# Supplementary material for: Phenol-mediated decarboxylative proton transfer of γ-methylidene-δ-valerolactones: an approach towards (E)-2,4-pentadienoates
Source: Royal Society of Chemistry journal article supplement (doi:10.1039/d3qo01766d), 2024-01-01

## Supporting Information

### Phenol-mediated decarboxylative proton transfers of $\gamma$ -methylidene- $\delta$ -valerolactone: an approach to (*E*)-2,4-pentadienoates

Wei Feng, Xiaoying Wu, Ran Song\*, Daoshan Yang, Wen Si\*, and Jian Lv\*

Key Laboratory of Optic-electric Sensing and Analytic Chemistry for Life Science, MOE, College of Chemistry and Molecular Engineering, Qingdao University of Science & Technology, Qingdao 266042, China

\*Email: lvjian@iccas.ac.cn (for J. Lv); siwen@qust.edu.cn (for W. Si); songran@qust.edu.cn (for R. Song)

## Table of Contents

|                                                            |     |
|------------------------------------------------------------|-----|
| I. General Procedure Information and Materials.....        | S1  |
| II. Optimization of Reaction Conditions.....               | S2  |
| III. Experimental Procedure and Characterization Data..... | S4  |
| IV. Control Experiments.....                               | S31 |
| V. X-ray Crystal Data.....                                 | S37 |
| VI. Reference.....                                         | S38 |
| VII. NMR Spectrum.....                                     | S39 |

## I. General Procedure Information and Materials

All commercial reagents were used without further purification unless otherwise noted. Solvents were freshly dried according to *the purification handbook Purification of Laboratory Chemicals* before using. All of  $\gamma$ -methylidene-  $\delta$ -valerolactones (GMDVs) **1aa-1da** were prepared according to literature procedure.<sup>1-4</sup> Proton and carbon magnetic resonance spectra ( $^1\text{H}$  NMR and  $^{13}\text{C}$  NMR) were recorded on a Bruker Avance 500MHz spectrometer. Tetramethylsilane (TMS) served as the internal standard for  $^1\text{H}$  NMR, and  $\text{CDCl}_3$  served as the internal standard for  $^{13}\text{C}$  NMR.  $^1\text{H}$  NMR data were reported as follows: chemical shift, multiplicity (s = singlet, d = doublet, t = triplet, m = multiplet, td = triplet of doublet, dt = doublet of triplet, dd = doublet of doublet), coupling constants (Hz), and integration. The X-ray single-crystal diffraction was performed on Saturn 724+ instrument. High resolution mass spectra were obtained on an Ultima Global spectrometer with an ESI source.

## II. Optimization of Reaction Conditions

Table S1. Optimization of the Phenol Derivatives <sup>a</sup>

| 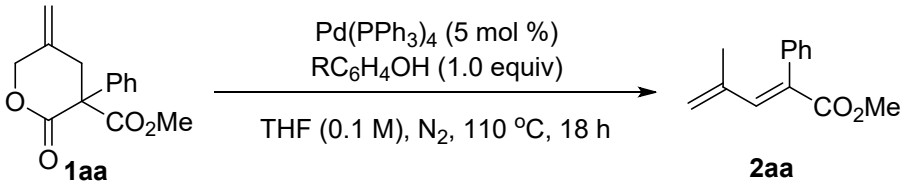 |                         |                        |
|------------------------------------------------------------------------------------|-------------------------|------------------------|
| entry                                                                              | R                       | yield (%) <sup>b</sup> |
| 1                                                                                  | H                       | 25                     |
| 2                                                                                  | 2-CF <sub>3</sub>       | 70                     |
| 3                                                                                  | 4-CF <sub>3</sub>       | 77                     |
| <b>4</b>                                                                           | <b>4-NO<sub>2</sub></b> | <b>82</b>              |
| 5                                                                                  | 3-OMe                   | 39                     |
| 6                                                                                  | 4-OMe                   | 21                     |
| 7                                                                                  | 2-Br                    | trace                  |
| 8                                                                                  | 3-Br                    | trace                  |
| 9                                                                                  | 4-Br                    | 16                     |
| 10                                                                                 | 4-F                     | 23                     |
| 11                                                                                 | 4-Cl                    | 36                     |
| 12                                                                                 | 2-CH <sub>3</sub>       | 10                     |

<sup>a</sup> Reaction conditions: **1aa** (0.1 mmol), Pd(PPh<sub>3</sub>)<sub>4</sub> (5 mol %) and RC<sub>6</sub>H<sub>4</sub>OH (1.0 equiv) in dry THF (1.0 mL) under the N<sub>2</sub> atmosphere at 110 °C for 18 h. <sup>b</sup> Isolated yield, *E/Z* = 83:17.

**Table S2. Optimization of the Ligand <sup>a</sup>**

| 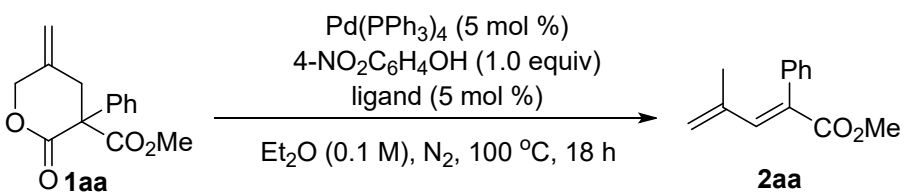 |           |                        |                         |
|------------------------------------------------------------------------------------|-----------|------------------------|-------------------------|
| entry                                                                              | ligand    | yield (%) <sup>b</sup> | <i>E/Z</i> <sup>c</sup> |
| <b>1</b>                                                                           | <b>L1</b> | <b>92%</b>             | <b>95:5</b>             |
| 2                                                                                  | L2        | 92%                    | 90:10                   |
| 3                                                                                  | L3        | trace                  | 97:3                    |
| 4                                                                                  | L4        | 96%                    | 84:16                   |
| 5                                                                                  | L5        | 90%                    | 95:5                    |

<sup>a</sup> Reaction conditions: **1aa** (0.1 mmol), Pd(PPh<sub>3</sub>)<sub>4</sub> (5 mol %), ligand (5 mol %), and 4-NO<sub>2</sub>C<sub>6</sub>H<sub>4</sub>OH (1.0 equiv) in dry Et<sub>2</sub>O (1 mL) under the N<sub>2</sub> atmosphere at 100 °C for 18 h. <sup>b</sup> Isolated yield. <sup>c</sup> Determined by <sup>1</sup>H NMR.

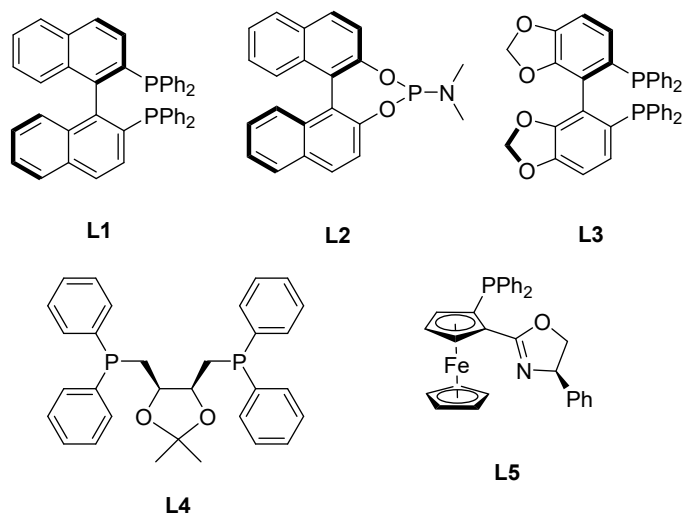

### III. Experimental Procedure and Characterization Data

#### A) Preparation of $\gamma$ -Methylidene- $\delta$ -valerolactones<sup>1-4</sup>

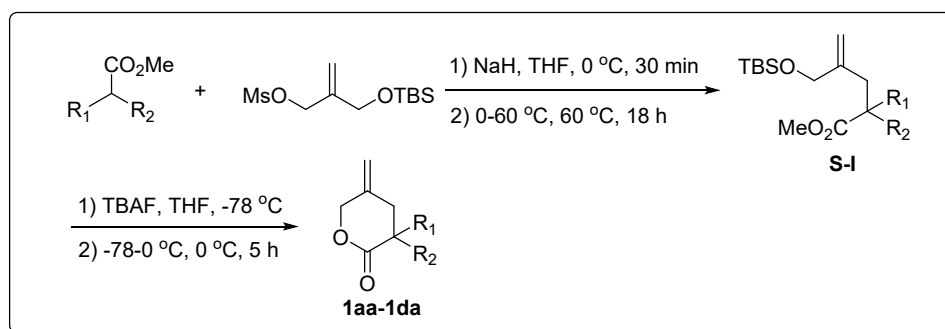

**General procedure I:** A solution of dimethyl phenylmalonate (2.08 g, 10.0 mmol) in THF (15 mL) was added to a suspension of NaH (420 mg, 10.5 mmol; 60 wt% in mineral oil) in THF (5 mL) at 0 °C. The mixture was stirred for 30 min at 0 °C and a solution of 2-(tert-butyldimethylsiloxy)methyl-2-propen-1-yl methanesulfonate (3.23 g, 11.5 mmol) in THF (12 mL) was then added to the reaction mixture. The resulting mixture was stirred for 18 h at 60 °C and quenched with water. After extraction with EtOAc, the combined organic layer was washed with NaCl (saturated aqueous), dried over Na<sub>2</sub>SO<sub>4</sub>, filtered, and concentrated under vacuum. The crude product was purified by flash column chromatography on silica gel eluting with petroleum ether/ethyl acetate (20:1, v/v) to afford the product **S-I**.

TBAF (1.1 equiv; 1.0 M solution in THF) was added to a solution of **S-I** in THF at -78 °C. The mixture was stirred for 5 h while gradually raising the temperature to 0 °C and the reaction was quenched with water. After extraction with EtOAc, the organic layer was washed with NaCl (saturated aqueous), dried over Na<sub>2</sub>SO<sub>4</sub>, filtered, and concentrated under vacuum. The crude product was purified by flash column chromatography on silica gel eluting with petroleum ether/ethyl acetate (5:1, v/v) to afford the products **1aa-1da**.

To a stirred solution of **S-I** in DCM (40 mL) was added TsOH·H<sub>2</sub>O (2.0 equiv) at rt. The mixture was stirred at room temperature overnight. After filtration, the solvent was removed under reduced pressure to give the crude product. The crude product was

purified by column chromatography with PE/EA = 1/10 to afford the desired product **1ea** as a known compound.

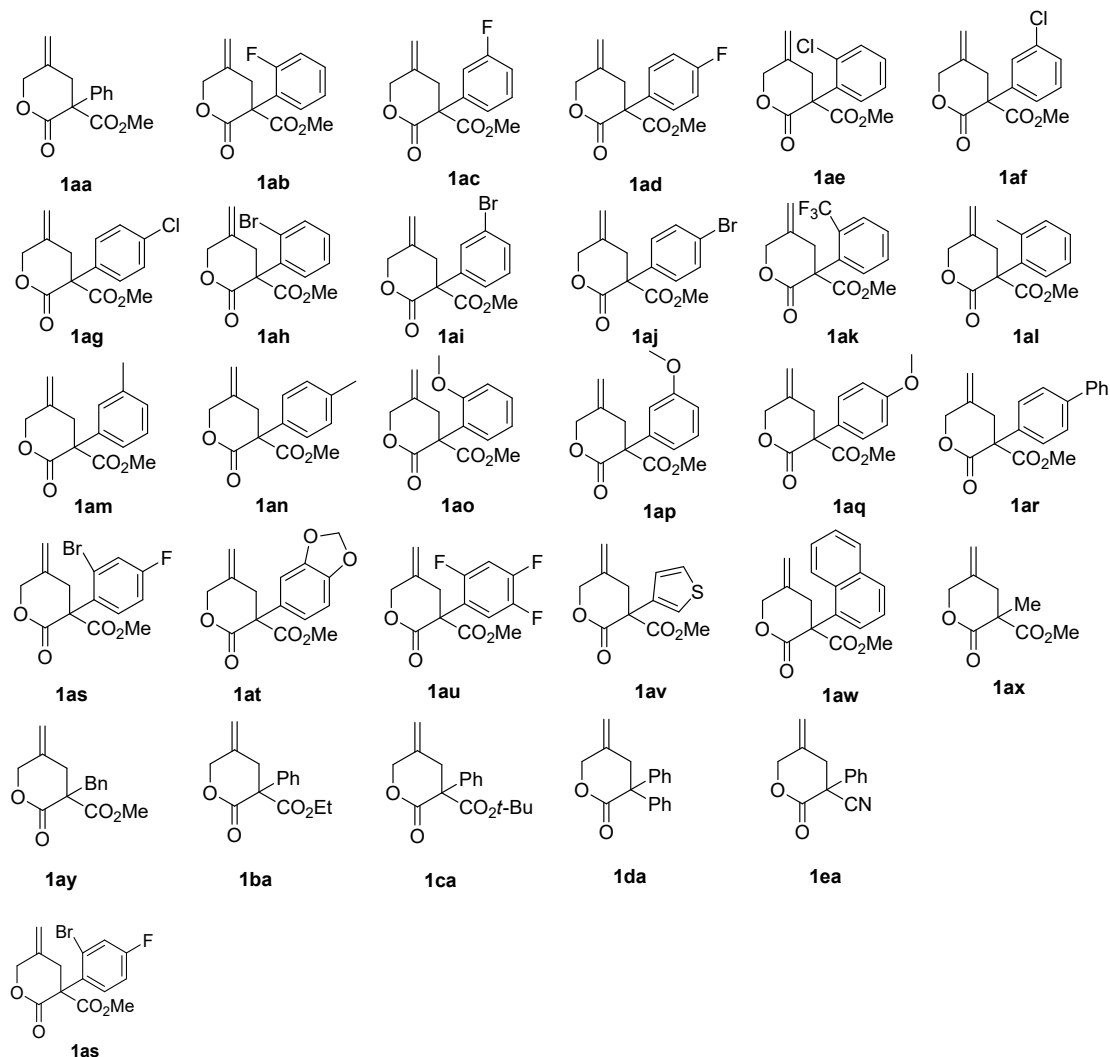

**1as**: Prepared according to the general procedure I above, and purified by a flash chromatography column with PE/EA (5:1, v/v) as the eluent. White solid (46% yield). Melting point: 140.6-150.8 °C.  $^1\text{H}$  NMR (500 MHz,  $\text{CDCl}_3$ )  $\delta$  7.38 (dd,  $J$  = 8.0, 2.5 Hz, 1H), 7.11 (dd,  $J$  = 9.0, 6.0 Hz, 1H), 7.04-7.00 (m, 1H), 4.94-4.91 (m, 3H), 4.83 (d,  $J$  = 14.0 Hz, 1H), 3.81 (s, 3H), 3.63 (d,  $J$  = 15.0 Hz, 1H), 3.40 (d,  $J$  = 15.0 Hz, 1H).  $^{13}\text{C}$  NMR (126 MHz,  $\text{CDCl}_3$ )  $\delta$  169.1, 167.5, 161.6 (d,  $^1J_{\text{C-F}}$  = 253.3 Hz), 135.0, 131.9 (d,  $^4J_{\text{C-F}}$  = 3.8 Hz), 130.8 (d,  $^3J_{\text{C-F}}$  = 8.8 Hz), 123.3 (d,  $^3J_{\text{C-F}}$  = 9.3 Hz), 122.5 (d,  $^2J_{\text{C-F}}$  = 23.9 Hz), 114.7 (d,  $^2J_{\text{C-F}}$  = 21.4 Hz), 113.3, 72.6, 62.7, 53.6, 36.8. HRMS (ESI)  $[\text{M}+\text{Na}]^+$  calcd for  $\text{C}_{14}\text{H}_{12}\text{BrFO}_4\text{Na}$  : 364.9795, found: 364.9796.

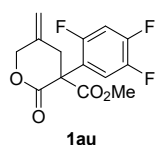

**1au:** Prepared according to the general procedure I above, and purified by a flash chromatography column with PE/EA (5:1, v/v) as the eluent. White solid (36% yield). Melting point: 100.3-110.5 °C.  $^1\text{H}$  NMR (500 MHz,  $\text{CDCl}_3$ )  $\delta$  7.06 – 6.94 (m, 2H), 5.04 (d,  $J$  = 7.0 Hz, 2H), 4.92 (d,  $J$  = 14.0 Hz, 1H), 4.86 (d,  $J$  = 14.5 Hz, 1H), 3.81 (s, 3H), 3.31 (d,  $J$  = 14.5 Hz, 1H), 3.19 (d,  $J$  = 14.5 Hz, 1H).  $^{13}\text{C}$  NMR (126 MHz,  $\text{CDCl}_3$ )  $\delta$  168.7, 166.7, 155.7 (ddd,  $^1J_{\text{C-F}}$  = 247.8 Hz,  $^3J_{\text{C-F}}$  = 9.3 Hz,  $^4J_{\text{C-F}}$  = 2.8 Hz), 149.9 (dt,  $^1J_{\text{C-F}}$  = 254.4 Hz,  $^3J_{\text{C-F}}$  = 13.2 Hz), 146.5 (ddd,  $^1J_{\text{C-F}}$  = 245.7 Hz,  $^3J_{\text{C-F}}$  = 12.5 Hz,  $^4J_{\text{C-F}}$  = 3.3 Hz), 134.8, 121.0 (dt,  $^3J_{\text{C-F}}$  = 14.6 Hz,  $^4J_{\text{C-F}}$  = 4.9 Hz), 116.9 (dd,  $^2J_{\text{C-F}}$  = 21.1 Hz,  $^4J_{\text{C-F}}$  = 5.0 Hz), 113.6, 106.6 (dd,  $^2J_{\text{C-F}}$  = 28.7, 21.1 Hz), 72.4, 58.4, 53.6, 37.1 (d,  $^4J_{\text{C-F}}$  = 4.0 Hz). HRMS (ESI)  $[\text{M}+\text{Na}]^+$  calcd for  $\text{C}_{14}\text{H}_{11}\text{F}_3\text{O}_4\text{Na}$  : 323.0502, found: 323.0508.

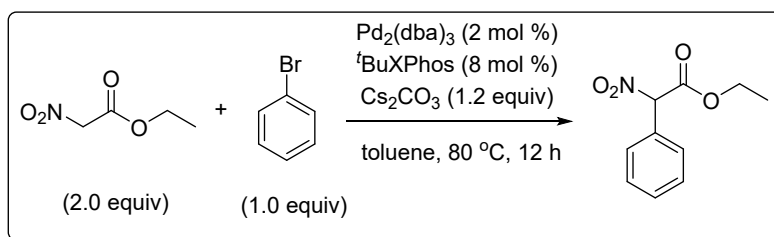

**Synthesis of ethyl  $\alpha$ -nitrobenzeneacetate:** In a nitrogen atmosphere, to an oven-dried 250ml eggplant shaped bottle was added  $\text{Pd}_2(\text{dba})_3$  (366 mg, 0.4 mmol),  $t\text{-BuXPhos}$  (680 mg, 1.6 mmol), and  $\text{Cs}_2\text{CO}_3$  (7.8 g, 24.0 mmol). Next, toluene (150 mL), ethyl nitroacetate (4.5 mL, 40.0 mmol), and bromobenzene (2.1 mL, 20.0 mmol) were added to give a heterogenous reaction mixture. The solution was then heated to 80 °C and stirred vigorously for 12 h. After cooling, the reaction mixture was diluted with EtOAc and acidified with HCl (1 M). The aqueous layer was extracted with additional EtOAc ( $\times 3$ ) and washed with brine. The combined organic layers were dried ( $\text{Na}_2\text{SO}_4$ ) and concentrated in vacuo. The crude residue was purified by a flash chromatography column with PE/EA (30:1, v/v) as the eluent. Afford the desired ethyl  $\alpha$ -nitrobenzeneacetate as a yellow oil (3.88 g, 18.6 mmol, 86% yield). The  $^1\text{H}$  NMR is in accordance with the literature.<sup>6</sup>

$^1\text{H}$  NMR (500 MHz,  $\text{CDCl}_3$ )  $\delta$  7.51- 7.44 (m, 5H), 6.18 (s, 1H), 4.40 – 4.26 (m, 2H), 1.29 (t,  $J$  = 7.0 Hz, 3H) ppm.

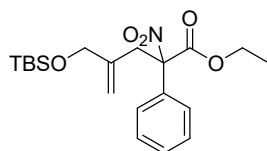

Synthesis of ethyl 4-(((*tert*-butyldimethylsilyl)oxy)methyl)-2-nitro-2-phenylpent-4-enoate: A solution of ethyl  $\alpha$ -nitrobenzeneacetate (3.88 g, 18.6 mmol) in THF (28 mL) was added to a suspension of NaH (782 mg, 19.5 mmol; 60 wt% in mineral oil) in THF (9 mL) at 0 °C. The mixture was stirred for 15 min at 0 °C and a solution of 2-((*tert*-butyldimethylsiloxy)methyl-2-propen-1-yl) methanesulfonate (6.01 g, 21.4 mmol) in THF (23 mL) was added to it. The resulting mixture was stirred for 36 h at 60 °C and was quenched with water. After extraction with EtOAc, the organic layer was washed with NaCl (saturated aqueous), dried over Na<sub>2</sub>SO<sub>4</sub>, filtered, and concentrated in vacuum. The residue was chromatographed on silica gel with PE/EA (50:1, v/v) to afford the product as a yellow oil (1.19 g, 3.1 mmol; 16% yield). The product was prepared according to the reported literature procedures.<sup>1</sup> <sup>1</sup>H NMR (500 MHz, CDCl<sub>3</sub>)  $\delta$  7.46 – 7.38 (m, 5H), 5.23 (d,  $J$  = 1.7 Hz, 1H), 5.10 (d,  $J$  = 1.4 Hz, 1H), 4.78 (s, 2H), 4.35 (q,  $J$  = 7.2 Hz, 2H), 4.13 (s, 2H), 1.35 (t,  $J$  = 7.1 Hz, 3H), 0.89 (s, 9H), 0.03 (s, 6H) ppm. <sup>13</sup>C NMR (126 MHz, CDCl<sub>3</sub>)  $\delta$  163.6, 149.6, 143.9, 129.6, 129.5, 129.1, 127.9, 113.1, 76.5, 63.8, 62.1, 25.9, 18.4, 14.2, -5.5 ppm.

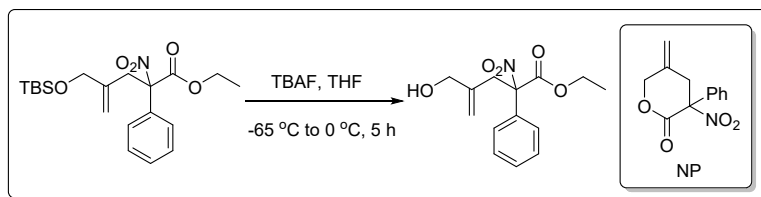

**Method A:** TBAF (1.1 mL, 1.1 mmol; 1.0 M solution in THF) was added to a solution of ethyl 4-(((*tert*-butyldimethylsilyl)oxy)methyl)-2-nitro-2-phenylpent-4-enoate (393 mg, 1.0 mmol) in THF (3 mL) at  $-65\text{ }^{\circ}\text{C}$ . The mixture was stirred for 5 h while gradually raising the temperature to  $0\text{ }^{\circ}\text{C}$  and the reaction was quenched with water. After extraction with EtOAc, the organic layer was washed with NaCl (saturated aqueous), dried over  $\text{Na}_2\text{SO}_4$ , filtered, and concentrated under vacuum. The residue was chromatographed on silica gel with PE/EA (2:1, v/v) to afford ethyl 4-(hydroxymethyl)-2-nitro-2-phenylpent-4-enoate as a colorless oil (165 mg, 0.59 mmol; 59% yield). No desired product was obtained.

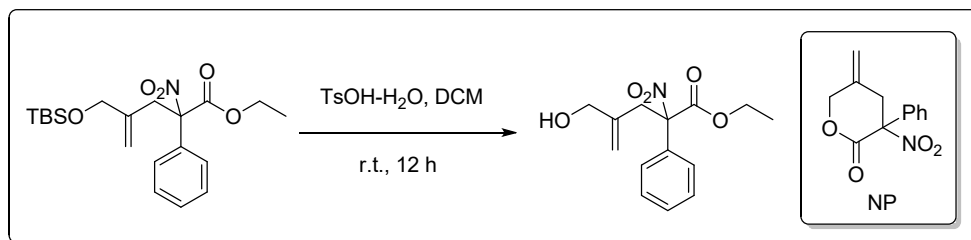

**Method B:** To a stirred solution of ethyl 4-(((*tert*-butyldimethylsilyl)oxy)methyl)-2-nitro-2-phenylpent-4-enoate (393 mg, 1.0 equiv.) in DCM (8 mL) was added  $\text{TsOH}\cdot\text{H}_2\text{O}$  (2.0 equiv.) at rt. The mixture was stirred at rt overnight. After filtration, the solvent was removed under reduced pressure to give the crude product. The crude product was purified by column chromatography with PE/EA (2:1, v/v) to afford ethyl 4-(hydroxymethyl)-2-nitro-2-phenylpent-4-enoate as a colorless oil (136 mg, 0.49 mmol; 49% yield). No desired product was obtained.

Ethyl 4-(hydroxymethyl)-2-nitro-2-phenylpent-4-enoate:  $^1\text{H}$  NMR (500 MHz,  $\text{CDCl}_3$ )  $\delta$  7.45 – 7.39 (m, 5H), 5.21 (d,  $J = 1.5\text{ Hz}$ , 1H), 5.13 (d,  $J = 1.0\text{ Hz}$ , 1H), 4.80 (s, 2H), 4.33 (q,  $J = 7.0\text{ Hz}$ , 2H), 4.12 (s, 2H), 1.33 (t,  $J = 7.0\text{ Hz}$ , 3H) ppm.  $^{13}\text{C}$  NMR (126 MHz,  $\text{CDCl}_3$ )  $\delta$  163.4, 149.5, 144.3, 129.7, 129.2, 129.1, 128.0, 115.0, 77.4, 63.9, 62.2, 14.1 ppm.

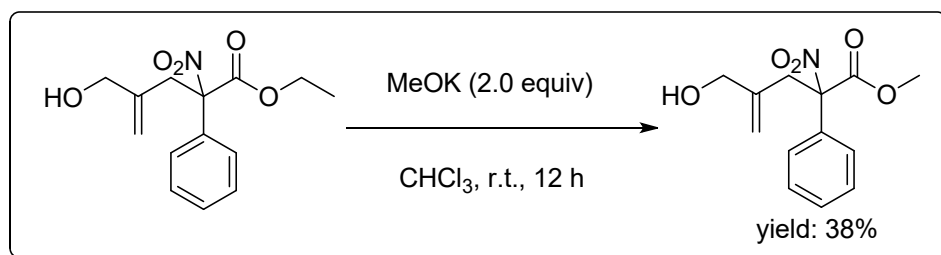

Colorless oil, 38 % yield. <sup>1</sup>H NMR (500 MHz, CDCl<sub>3</sub>) δ 7.42 (s, 5H), 5.23 (s, 1H), 5.15 (s, 1H), 4.82 (s, 2H), 4.14 (s, 2H), 3.88 (s, 3H). <sup>13</sup>C NMR (126 MHz, CDCl<sub>3</sub>) δ 163.7, 149.4, 144.9, 129.8, 129.1, 129.1, 128.1, 115.1, 76.8, 64.0, 53.0.

## B) Synthesis of 1,3-diene products **2**

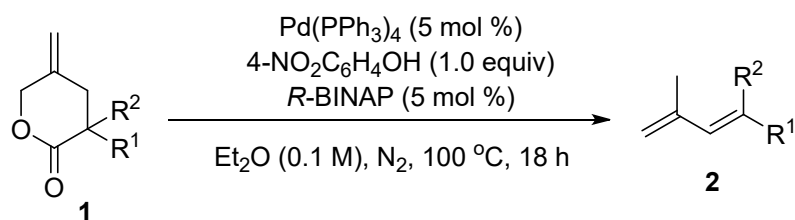

**General Procedure II:** Under a nitrogen atmosphere, to an oven dried 10 mL Schlenk flask equipped with a stirring bar was added GMDVs **1** (0.1 mmol), 4- $\text{NO}_2\text{C}_6\text{H}_4\text{OH}$  (0.1 mmol),  $\text{Pd(PPh}_3)_4$  (5 mol %), *R*-BINAP (5 mol %) and dry  $\text{Et}_2\text{O}$  (1.0 mL). The resultant mixture was degassed three times by freeze-pump-thaw cycles, and then stirred at 100 °C for 18 h. The reaction mixture was purified by flash column chromatography on silica gel eluting with petroleum ether/ethyl acetate, giving the corresponding product **2**.

**Large-scale Reaction:** Under a nitrogen atmosphere, to an oven dried 100 mL Schlenk flask equipped with a stirring bar was added GMDVs **1aa** (1.48g, 6.0 mmol), 4- $\text{NO}_2\text{C}_6\text{H}_4\text{OH}$  (6.0 mmol),  $\text{Pd(PPh}_3)_4$  (5 mol %), *R*-BINAP (5 mol %) and dry  $\text{Et}_2\text{O}$  (60.0 mL). The resultant mixture was degassed three times by freeze-pump-thaw cycles, and then stirred at 100 °C for 18 h. The reaction mixture was purified by flash column chromatography on silica gel eluting with petroleum ether/ethyl acetate, giving the corresponding product **2aa** (1.13g, 93%, *E/Z* = 90:10).

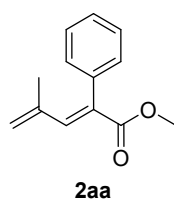

**2aa:** Prepared according to the general procedure II above, and purified by a flash chromatography column with PE/EA (50:1, v/v) as the eluent. Colorless oil (18.6 mg, 92% yield, *E/Z* = 95:5).  $^1\text{H}$  NMR (500 MHz,  $\text{CDCl}_3$  for major isomer **E-2aa**)  $\delta$  7.48 (s, 1H), 7.35 – 7.28 (m, 3H), 7.19-7.18 (m, 2H), 5.24 (s, 1H), 5.18 (s, 1H), 3.72 (s, 3H), 1.37 (s, 3H) ppm.  $^{13}\text{C}$  NMR (126 MHz,  $\text{CDCl}_3$ , for major isomer **E-2aa**)  $\delta$  168.5, 142.8, 141.0, 136.0, 131.9, 130.1, 127.7, 127.6, 124.97, 52.25, 21.18 ppm. HRMS (ESI)  $[\text{M}+\text{Na}]^+$  calcd for  $\text{C}_{13}\text{H}_{14}\text{O}_2\text{Na}$ : 225.0886, found: 225.0890.

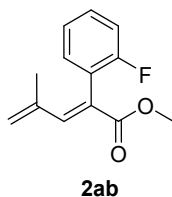

**2ab:** Prepared according to the general procedure II above, and purified by a flash chromatography column with PE/EA (50:1, v/v) as the eluent. Colorless oil (13.9 mg, 63% yield, *E/Z* = 96:4). <sup>1</sup>H NMR (500 MHz, CDCl<sub>3</sub>, for major isomer **E-2ab**) δ 7.59 (s, 1H), 7.35 – 7.29 (m, 1H), 7.17 – 7.11 (m, 2H), 7.06 (t, *J* = 9.0 Hz, 1H), 5.28 (s, 1H), 5.23 (s, 1H), 3.74 (s, 3H), 1.95 (s, 0.12H), 1.44 (s, 3H) ppm. <sup>13</sup>C NMR (126 MHz, CDCl<sub>3</sub> major isomer **E-2ab**) δ 167.6, 160.2 (d, <sup>1</sup>*J*<sub>C-F</sub> = 245.8 Hz), 144.8, 140.6, 132.1, 129.8 (d, <sup>3</sup>*J*<sub>C-F</sub> = 7.8 Hz), 125.5, 125.4, 123.8 (d, <sup>2</sup>*J*<sub>C-F</sub> = 17.2 Hz), 123.5 (d, <sup>4</sup>*J*<sub>C-F</sub> = 2.5 Hz), 115.2 (d, <sup>2</sup>*J*<sub>C-F</sub> = 22.0 Hz), 52.3, 20.6 ppm. HRMS (ESI) [M+Na]<sup>+</sup> calcd for C<sub>13</sub>H<sub>13</sub>FO<sub>2</sub>Na: 243.0792, found: 243.0794.

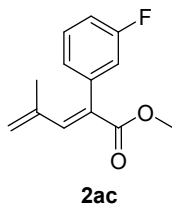

**2ac:** Prepared according to the general procedure II above, and purified by a flash chromatography column with PE/EA (50:1, v/v) as the eluent. Colorless oil (10.1 mg, 46% yield, *E/Z* = 83:17). <sup>1</sup>H NMR (500 MHz, CDCl<sub>3</sub>, for major isomer **E-2ac**) δ 7.49 (s, 1H), 7.29 (dd, *J* = 14.0, 7.8 Hz, 1H), 7.02 (td, *J* = 8.5, 2.0 Hz, 1H), 6.97 (d, *J* = 7.5 Hz, 1H), 6.92 (d, *J* = 9.5 Hz, 1H), 5.27 (s, 1H), 5.22 (s, 1H), 3.74 (s, 3H), 1.41 (s, 3H) ppm. <sup>13</sup>C NMR (126 MHz, CDCl<sub>3</sub>, for major isomer **E-2ac**) δ 168.0, 162.2 (d, <sup>1</sup>*J*<sub>C-F</sub> = 246.2 Hz), 143.4, 140.5, 138.1 (d, <sup>3</sup>*J*<sub>C-F</sub> = 8.0 Hz), 134.0, 130.5, 129.2 (d, <sup>3</sup>*J*<sub>C-F</sub> = 8.3 Hz), 125.9 (d, <sup>4</sup>*J*<sub>C-F</sub> = 2.1 Hz), 125.5, 117.2 (d, <sup>2</sup>*J*<sub>C-F</sub> = 21.5 Hz), 114.6 (d, *J* = 21.0 Hz), 113.16 (d, *J* = 22.9 Hz), 52.32, 21.12 ppm. HRMS (ESI) [M+Na]<sup>+</sup> calcd for C<sub>13</sub>H<sub>13</sub>FO<sub>2</sub>Na: 243.0792, found: 243.0787.

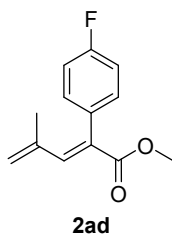

**2ad:** Prepared according to the general procedure II above, and purified by a flash chromatography column with PE/EA (50:1, v/v, for major isomer **E-2ad**) as the eluent. Colorless oil (8.4 mg, 38% yield, *E/Z* = 86:14).  $^1\text{H}$  NMR (500 MHz,  $\text{CDCl}_3$ )  $\delta$  7.49 (s, 1H), 7.18 – 7.13 (m, 2H), 7.05 – 7.00 (m, 2H), 5.26 (s, 1H), 5.21 (s, 1H), 3.74 (s, 3H), 1.39 (s, 3H) ppm.  $^{13}\text{C}$  NMR (126 MHz,  $\text{CDCl}_3$ )  $\delta$  168.3, 162.4 (d,  $^1J_{\text{C-F}} = 246.7$  Hz), 143.3, 140.7, 133.2, 131.8 (d,  $^4J_{\text{C-F}} = 3.5$  Hz), 131.72 (d,  $^3J_{\text{C-F}} = 8.0$  Hz), 130.8, 125.3, 114.75 (d,  $^2J_{\text{C-F}} = 21.5$  Hz), 52.3, 21.3 ppm. HRMS (ESI)  $[\text{M}+\text{Na}]^+$  calcd for  $\text{C}_{13}\text{H}_{13}\text{FO}_2\text{Na}$ : 243.0792, found: 243.0795.

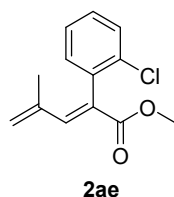

**2ae:** Prepared according to the general procedure II above, and purified by a flash chromatography column with PE/EA (50:1, v/v) as the eluent. Colorless oil (21.7 mg, 92% yield, *E/Z* = 99:1).  $^1\text{H}$  NMR (500 MHz,  $\text{CDCl}_3$ , for major isomer **E-2ae**)  $\delta$  7.55 (s, 1H), 7.39 (d,  $J = 8.0$  Hz, 1H), 7.26 (dt,  $J = 14.5, 7.5$  Hz, 2H), 7.17 (d,  $J = 7.5$  Hz, 1H), 5.28 (s, 1H), 5.23 (s, 1H), 3.73 (s, 3H), 1.38 (s, 3H) ppm.  $^{13}\text{C}$  NMR (126 MHz,  $\text{CDCl}_3$ )  $\delta$  167.6, 144.0, 140.7, 135.3, 134.4, 131.8, 129.3, 129.0, 126.2, 125.8, 52.4, 20.5 ppm. HRMS (ESI)  $[\text{M}+\text{Na}]^+$  calcd for  $\text{C}_{13}\text{H}_{13}\text{ClO}_2\text{Na}$ : 259.0496, found: 259.0492.

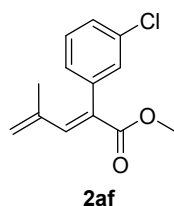

**2af:** Prepared according to the general procedure II above, and purified by a flash chromatography column with PE/EA (50:1, v/v) as the eluent. Colorless oil (17.9 mg, 76% yield, *E/Z* = 88:12).  $^1\text{H}$  NMR (500 MHz,  $\text{CDCl}_3$ , for major isomer **E-2af**)  $\delta$  7.49 (s, 1H), 7.31 – 7.25 (m, 2H), 7.19 (s, 1H), 7.08 (d,  $J = 7.3$  Hz, 1H), 5.27 (s, 1H), 5.23 (s, 1H), 3.74 (s, 3H), 1.40 (s, 3H) ppm.  $^{13}\text{C}$  NMR (126 MHz,  $\text{CDCl}_3$ )  $\delta$  167.0, 142.5, 139.5, 136.8, 132.6, 129.4, 129.1, 127.9, 127.3, 126.8, 124.7, 51.4, 20.3 ppm. HRMS (ESI)  $[\text{M}+\text{Na}]^+$  calcd for  $\text{C}_{13}\text{H}_{13}\text{ClO}_2\text{Na}$ : 259.0496, found: 259.0496.

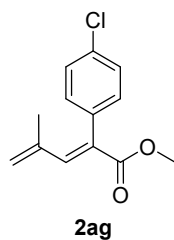

**2ag:** Prepared according to the general procedure II above, and purified by a flash chromatography column with PE/EA (50:1, v/v) as the eluent. Colorless oil (30.7 mg, 45% yield, *E/Z* = 83:17). <sup>1</sup>H NMR (500 MHz, CDCl<sub>3</sub>, for major isomer **E-2ag**) δ 7.49 (s, 1H), 7.17 – 7.12 (m, 2H), 7.05 – 7.01 (m, 2H), 5.26 (s, 1H), 5.21 (s, 1H), 3.74 (s, 3H), 1.39 (s, 3H) ppm. <sup>13</sup>C NMR (126 MHz, CDCl<sub>3</sub>) δ 167.32, 162.37, 160.41, 142.27, 139.72, 132.17, 130.86, 130.83, 130.75, 130.69, 130.44, 129.76, 127.03, 126.96, 124.25, 119.41, 114.70, 114.53, 113.84, 113.67, 51.30, 51.14, 30.43, 29.21, 20.27, 19.04 ppm. HRMS (ESI) [M+Na]<sup>+</sup> calcd for C<sub>13</sub>H<sub>13</sub>ClO<sub>2</sub>Na: 259.0496, found: 259.0497.

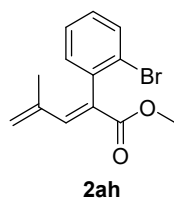

**2ah:** Prepared according to the general procedure II above, and purified by a flash chromatography column with PE/EA (50:1, v/v) as the eluent. Colorless oil (27.2 mg, 97% yield, *E/Z* = 99:1). <sup>1</sup>H NMR (500 MHz, CDCl<sub>3</sub>, for major isomer **E-2ah**) δ 7.58 (d, *J* = 8.0 Hz, 1H), 7.53 (s, 1H), 7.29 (t, *J* = 7.5 Hz, 1H), 7.19 (dd, *J* = 13.0, 7.5 Hz, 2H), 5.29 (s, 1H), 5.23 (s, 1H), 3.73 (s, 3H), 1.38 (s, 3H) ppm. <sup>13</sup>C NMR (126 MHz, CDCl<sub>3</sub>, for major isomer **E-2ah**) δ 166.4, 142.7, 139.7, 136.4, 131.2, 130.7, 129.8, 128.3, 125.8, 124.7, 123.7, 51.4, 19.6 ppm. HRMS (ESI) [M+Na]<sup>+</sup> calcd for C<sub>13</sub>H<sub>13</sub>BrO<sub>2</sub>Na: 302.9991, found: 302.9987.

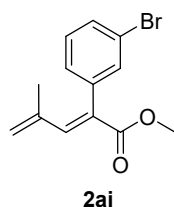

**2ai:** Prepared according to the general procedure II above, and purified by a flash chromatography column with PE/EA (50:1, v/v) as the eluent. Colorless oil (6.2 mg,

22% yield, *E/Z* = 95:5). <sup>1</sup>H NMR (500 MHz, CDCl<sub>3</sub>, for major isomer **E-2ai**) δ 7.49 (s, 1H), 7.46 (d, *J* = 8.0 Hz, 1H), 7.35 (s, 1H), 7.21 (t, *J* = 7.5 Hz, 1H), 7.13 (d, *J* = 7.5 Hz, 1H), 5.28 (s, 1H), 5.24 (s, 1H), 3.74 (s, 3H), 1.41 (s, 3H) ppm. <sup>13</sup>C NMR (126 MHz, CDCl<sub>3</sub>, for major isomer **E-2ai**) δ 168.0, 143.6, 140.5, 138.1, 133.0, 130.7, 130.3, 129.2, 128.8, 125.8, 121.7, 52.4, 21.3 ppm. HRMS (ESI) [M+H]<sup>+</sup> calcd for C<sub>13</sub>H<sub>14</sub>BrO<sub>2</sub>: 281.0172, found: 281.0178.

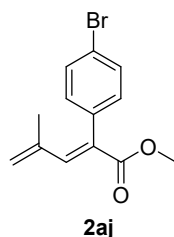

**2aj**: Prepared according to the general procedure II above, and purified by a flash chromatography column with PE/EA (50:1, v/v) as the eluent. Colorless oil (6.2 mg, 22% yield, *E/Z* = 95:5). <sup>1</sup>H NMR (400 MHz, CDCl<sub>3</sub>, for major isomer **E-2aj**) δ 7.49 (s, 1H), 7.47 (d, *J* = 9.5 Hz, 2H), 7.07 (d, *J* = 10.5 Hz, 2H), 5.26 (s, 1H), 5.22 (s, 1H), 3.74 (s, 3H), 1.41 (s, 3H) ppm. <sup>13</sup>C NMR (101 MHz, CDCl<sub>3</sub>) δ 168.1, 143.4, 140.6, 135.0, 131.8, 131.0, 130.5, 125.6, 121.9, 52.4, 21.4 ppm. HRMS (ESI) [M+Na]<sup>+</sup> calcd for C<sub>13</sub>H<sub>13</sub>BrO<sub>2</sub>Na: 302.9991, found: 302.9981.

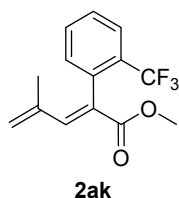

**2ak**: Prepared according to the general procedure II above, and purified by a flash chromatography column with PE/EA (50:1, v/v) as the eluent. Colorless oil (22.9 mg, 85% yield, *E/Z* = 99:1). <sup>1</sup>H NMR (500 MHz, CDCl<sub>3</sub>, for major isomer **E-2ak**) δ 7.68 (d, *J* = 7.5 Hz, 1H), 7.56 – 7.49 (m, 2H), 7.47 (d, *J* = 7.5 Hz, 1H), 7.26 (d, *J* = 6.5 Hz, 1H), 5.29 (s, 1H), 5.23 (s, 1H), 3.70 (s, 3H), 1.29 (s, 3H) ppm. <sup>13</sup>C NMR (126 MHz, CDCl<sub>3</sub>, for major isomer **E-2ak**) δ 167.7, 143.7, 140.5, 134.9, 132.3, 131.1, 129.37 (q, <sup>2</sup>*J*<sub>C-F</sub> = 30.2 Hz), 128.4, 128.1, 126.4, 125.99 (q, <sup>3</sup>*J*<sub>C-F</sub> = 5.0 Hz), 124.01 (q, <sup>1</sup>*J*<sub>C-F</sub> = 274.7 Hz) 52.3, 20.5 ppm. HRMS (ESI) [M+Na]<sup>+</sup> calcd for C<sub>14</sub>H<sub>13</sub>F<sub>3</sub>O<sub>2</sub>Na: 293.0760, found: 293.0761.

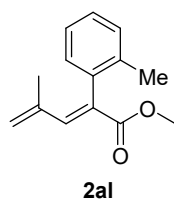

**2al:** Prepared according to the general procedure II above, and purified by a flash chromatography column with PE/EA (50:1, v/v) as the eluent. Colorless oil (19.5 mg, 90% yield, *E/Z* = 98:2).  $^1\text{H}$  NMR (500 MHz,  $\text{CDCl}_3$ , for major isomer **E-2al**)  $\delta$  7.51 (s, 1H), 7.19 (d,  $J$  = 16.5 Hz, 1H), 7.17 – 7.13 (m, 2H), 7.05 (d,  $J$  = 7.0 Hz, 1H), 5.25 (s, 1H), 5.18 (s, 1H), 3.71 (s, 3H), 2.16 (s, 3H), 1.31 (s, 3H) ppm.  $^{13}\text{C}$  NMR (126 MHz,  $\text{CDCl}_3$ , for major isomer **E-2al**)  $\delta$  168.4, 143.0, 141.1, 136.9, 135.7, 131.0, 130.1, 129.5, 128.0, 125.2, 125.2, 52.3, 20.6, 19.8 ppm. HRMS (ESI)  $[\text{M}+\text{Na}]^+$  calcd for  $\text{C}_{14}\text{H}_{16}\text{O}_2\text{Na}$ : 239.1043, found: 239.1044.

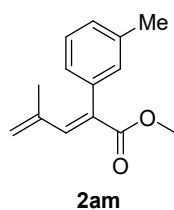

**2am:** Prepared according to the general procedure II above, and purified by a flash chromatography column with PE/EA (50:1, v/v) as the eluent. Colorless oil (16.4 mg, 76% yield, *E/Z* = 80:20).  $^1\text{H}$  NMR (500 MHz,  $\text{CDCl}_3$ , for major isomer **E-2am**)  $\delta$  7.47 (s, 1H), 7.22 (t,  $J$  = 8.0 Hz, 1H), 7.13 (d,  $J$  = 7.5 Hz, 1H), 6.99 (d,  $J$  = 8.5 Hz, 2H), 5.26 (s, 1H), 5.19 (s, 1H), 3.74 (s, 3H), 2.35 (s, 3H), 1.39 (s, 3H) ppm.  $^{13}\text{C}$  NMR (126 MHz,  $\text{CDCl}_3$ , for major isomer **E-2am**)  $\delta$  168.7, 142.6, 141.1, 137.2, 135.9, 131.9, 130.7, 128.4, 127.6, 127.1, 125.0, 52.3, 21.4, 21.2 ppm. HRMS (ESI)  $[\text{M}+\text{Na}]^+$  calcd for  $\text{C}_{14}\text{H}_{16}\text{O}_2\text{Na}$ : 239.1043, found: 239.1048.

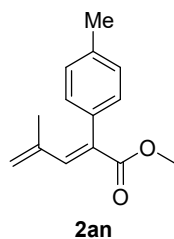

**2an:** Prepared according to the general procedure II above, and purified by a flash chromatography column with PE/EA (50:1, v/v) as the eluent. Colorless oil (21.2 mg,

98% yield, *E/Z* = 80:20). <sup>1</sup>H NMR (500 MHz, CDCl<sub>3</sub>, for major isomer **E-2an**) δ 7.46 (s, 1H), 7.16 – 7.11 (m, 2H), 7.07 (d, *J* = 7.5 Hz, 2H), 5.24 (s, 1H), 5.17 (s, 1H), 3.72 (s, 3H), 2.36 (s, 3H), 1.39 (s, 3H) ppm. <sup>13</sup>C NMR (126 MHz, CDCl<sub>3</sub>, for major isomer **E-2an**) δ 167.7, 141.6, 140.1, 136.3, 132.0, 128.90, 128.4, 127.4, 125.0, 123.6, 51.2, 51.0, 20.3, 20.2, ppm. HRMS (ESI) [M+Na]<sup>+</sup> calcd for C<sub>14</sub>H<sub>16</sub>O<sub>2</sub>Na: 239.1043, found: 239.1043.

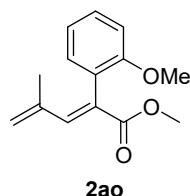

**2ao:** Prepared according to the general procedure II above, and purified by a flash chromatography column with PE/EA (50:1, v/v) as the eluent. Colorless oil (22.9 mg, 99% yield, *E/Z* = 96:4). <sup>1</sup>H NMR (500 MHz, CDCl<sub>3</sub>, for major isomer **E-2ao**) δ 7.48 (s, 1H), 7.32 (t, *J* = 8.0 Hz, 1H), 7.06 (d, *J* = 7.0 Hz, 1H), 6.93 (t, *J* = 7.5 Hz, 1H), 6.89 (d, *J* = 8.5 Hz, 1H), 5.24 (s, 1H), 5.17 (s, 1H), 3.78 (s, 3H), 3.71 (s, 3H), 1.41 (s, 3H) ppm. <sup>13</sup>C NMR (126 MHz, CDCl<sub>3</sub>, for major isomer **E-2ao**) δ 167.5, 156.5, 141.9, 140.1, 130.4, 128.4, 127.7, 124.4, 123.4, 119.1, 109.5, 54.6, 51.1, 19.7 ppm. HRMS (ESI) [M+Na]<sup>+</sup> calcd for C<sub>14</sub>H<sub>16</sub>O<sub>3</sub>Na: 255.0992, found: 255.1000.

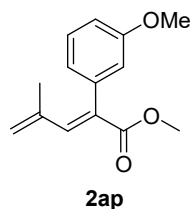

**2ap:** Prepared according to the general procedure II above, and purified by a flash chromatography column with PE/EA (50:1, v/v) as the eluent. Colorless oil (30.7 mg, 46% yield, *E/Z* = 97:3). <sup>1</sup>H NMR (500 MHz, CDCl<sub>3</sub>, for major isomer **E-2ap**) δ 7.47 (s, 1H), 7.24 (t, *J* = 8.0 Hz, 1H), 6.87 (d, *J* = 8.0 Hz, 1H), 6.78 (d, *J* = 7.5 Hz, 1H), 6.74 (s, 1H), 5.27 (s, 1H), 5.20 (s, 1H), 3.80 (s, 3H), 3.73 (s, 3H), 1.42 (s, 3H) ppm. <sup>13</sup>C NMR (126 MHz, CDCl<sub>3</sub>, for major isomer **E-2ap**) δ 167.4, 158.0, 141.8, 140.0, 136.3, 130.6, 127.7, 124.0, 121.6, 114.8, 112.1, 54.2, 51.3, 20.0 ppm. HRMS (ESI) [M+Na]<sup>+</sup> calcd for C<sub>14</sub>H<sub>16</sub>O<sub>3</sub>Na: 255.0992, found: 255.0985.

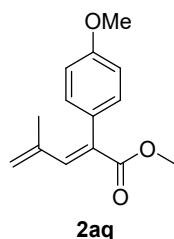

**2aq:** Prepared according to the general procedure II above, and purified by a flash chromatography column with PE/EA (50:1, v/v) as the eluent. Colorless oil (22.7 mg, 98% yield, *E/Z* = 80:20).  $^1\text{H}$  NMR (500 MHz,  $\text{CDCl}_3$ , for major isomer **E-2aq**)  $\delta$  7.46 (s, 1H), 7.11 (d,  $J$  = 8.5 Hz, 2H), 6.87 (d,  $J$  = 8.5 Hz, 2H), 5.25 (s, 1H), 5.19 (s, 1H), 3.82 (s, 3H), 3.74 (s, 3H), 1.41 (s, 3H) ppm.  $^{13}\text{C}$  NMR (126 MHz,  $\text{CDCl}_3$ , for major isomer **E-2aq**)  $\delta$  167.8, 158.1, 141.7, 140.1, 130.2, 127.1, 126.4, 123.6, 112.2, 54.2, 51.2, 20.2 ppm. HRMS (ESI)  $[\text{M}+\text{Na}]^+$  calcd for  $\text{C}_{14}\text{H}_{16}\text{O}_3\text{Na}$ : 255.0992, found: 255.0998.

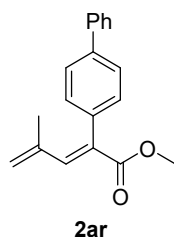

**2ar:** Prepared according to the general procedure II above, and purified by a flash chromatography column with PE/EA (50:1, v/v) as the eluent. Colorless oil (19.5 mg, 70% yield, *E/Z* = 91:9).  $^1\text{H}$  NMR (500 MHz,  $\text{CDCl}_3$ , for major isomer **E-2ar**)  $\delta$  7.56 (d,  $J$  = 7.5 Hz, 2H), 7.50 (d,  $J$  = 8.5 Hz, 2H), 7.44 (s, 1H), 7.37 (t,  $J$  = 8.0 Hz, 2H), 7.28 (d,  $J$  = 7.5 Hz, 1H), 7.19 (d,  $J$  = 8.0 Hz, 2H), 5.21 (s, 1H), 5.14 (s, 1H), 3.69 (s, 3H), 1.37 (s, 3H) ppm.  $^{13}\text{C}$  NMR (126 MHz,  $\text{CDCl}_3$ , for major isomer **E-2ar**)  $\delta$  168.5, 143.0, 141.0, 140.7, 140.4, 135.0, 131.5, 130.5, 128.8, 127.4, 127.1, 126.4, 125.0, 52.3, 21.3 ppm. HRMS (ESI)  $[\text{M}+\text{H}]^+$  calcd for  $\text{C}_{19}\text{H}_{19}\text{O}_2$ : 279.1380, found: 279.1385.

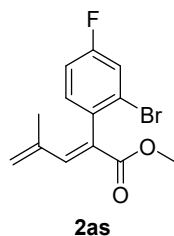

**2as:** Prepared according to the general procedure II above, and purified by a flash chromatography column with PE/EA (50:1, v/v) as the eluent. Colorless oil (19.4 mg, 65% yield, *E/Z* > 99:1).  $^1\text{H}$  NMR (500 MHz,  $\text{CDCl}_3$ , for major isomer **E-2as**)  $\delta$  7.54 (s, 1H),

7.33 (dd,  $J = 8.0, 2.5$  Hz, 1H), 7.16 – 7.13 (m, 1H), 7.04 – 7.00 (m, 1H), 5.30 (s, 1H), 5.25 (s, 1H), 3.73 (s, 3H), 1.39 (s, 3H) ppm.  $^{13}\text{C}$  NMR (126 MHz,  $\text{CDCl}_3$ , for major isomer **E-2as**)  $\delta$  167.3, 162.0 (d,  $^1J_{\text{C-H}} = 252.0$  Hz), 144.3, 140.4, 133.4 (d,  $^4J_{\text{C-H}} = 2.5$  Hz), 132.5 (d,  $^3J_{\text{C-H}} = 8.8$  Hz), 129.8, 126.2, 124.9 (d,  $^3J_{\text{C-H}} = 10.1$  Hz), 119.6 (d,  $^2J_{\text{C-H}} = 23.9$  Hz), 114.2 (d,  $^2J_{\text{C-H}} = 21.4$  Hz), 52.4, 20.7 ppm. HRMS (ESI)  $[\text{M}+\text{Na}]^+$  calcd for  $\text{C}_{13}\text{H}_{12}\text{BrFO}_2\text{Na}$ : 320.9897, found: 320.9897.

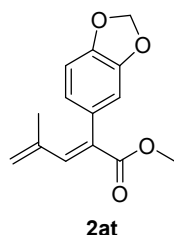

**2at:** Prepared according to the general procedure above, and purified by a flash chromatography column with PE/EA (50:1, v/v) as the eluent. Colorless oil (20.9 mg, 85% yield,  $E/Z = 83:17$ ).  $^1\text{H}$  NMR (500 MHz,  $\text{CDCl}_3$ , for major isomer **E-2at**)  $\delta$  7.44 (s, 1H), 6.77 (d,  $J = 8.0$  Hz, 1H), 6.68 (s, 1H), 6.63 (dd,  $J = 8.0, 1.5$  Hz, 1H), 5.97 (s, 2H), 5.26 (s, 1H), 5.20 (s, 1H), 3.74 (s, 3H), 1.46 (s, 3H) ppm.  $^{13}\text{C}$  NMR (126 MHz,  $\text{CDCl}_3$ , for major isomer **E-2at**)  $\delta$  168.5, 147.2, 147.1, 143.0, 141.0, 131.3, 129.5, 124.9, 123.7, 110.6, 107.7, 101.1, 52.3, 21.1 ppm. HRMS (ESI)  $[\text{M}+\text{Na}]^+$  calcd for  $\text{C}_{14}\text{H}_{14}\text{O}_4\text{Na}$ : 269.0784, found: 269.0791.

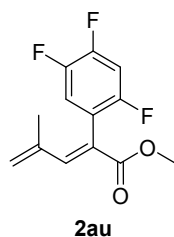

**2au:** Prepared according to the general procedure above, and purified by a flash chromatography column with PE/EA (50:1, v/v) as the eluent. Colorless oil (20.7 mg, 81% yield,  $E/Z = 96:4$ ).  $^1\text{H}$  NMR (500 MHz,  $\text{CDCl}_3$ , for major isomer **E-2au**)  $\delta$  7.58 (s, 1H), 7.03 – 6.88 (m, 2H), 5.28 (s, 2H), 3.74 (s, 3H), 1.50 (s, 3H) ppm.  $^{13}\text{C}$  NMR (126 MHz,  $\text{CDCl}_3$ , for major isomer **E-2au**)  $\delta$  166.9, 155.7 (ddd,  $^1J_{\text{C-F}} = 245.7$  Hz,  $^3J_{\text{C-F}} = 8.8$  Hz,  $^4J_{\text{C-F}} = 2.5$  Hz), 149.9 (ddd,  $^1J_{\text{C-F}} = 253.3$  Hz,  $^2J_{\text{C-F}} = 13.9, 12.6$  Hz), 146.5 (ddd,  $^1J_{\text{C-F}} = 245.7$  Hz,  $^2J_{\text{C-F}} = 12.6$  Hz,  $^4J_{\text{C-F}} = 3.8$  Hz), 145.8, 140.0, 126.2, 123.4, 120.0 (ddd,  $^2J_{\text{C-F}} = 20.2$  Hz,  $^3J_{\text{C-F}} = 6.3$  Hz,  $^4J_{\text{C-F}} = 5.0$  Hz), 119.7 (dd,  $^2J_{\text{C-F}} = 18.9$  Hz,  $^4J_{\text{C-F}} = 3.8$  Hz), 105.3 (dd,  $^2J_{\text{C-F}} = 29.0$ ,

21.4 Hz), 52.4, 20.6 ppm. HRMS (ESI)  $[M+H]^+$  calcd for  $C_{13}H_{13}F_3O_2$ : 257.0784, found: 257.0782.

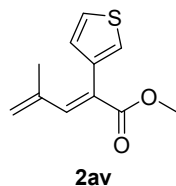

**2av**: Prepared according to the general procedure above, and purified by a flash chromatography column with PE/EA (50:1, v/v) as the eluent. Yellow oil (19.5 mg, 99% yield,  $E/Z = 75:25$ ).  $^1H$  NMR (500 MHz,  $CDCl_3$ )  $\delta$  7.48 (s, 1H), 7.31 – 7.27 (m, 1.33H), 7.19 (dd,  $J = 9.0, 3.0$  Hz, 0.66H), 7.11 (d,  $J = 1.5$  Hz, 1H), 6.98 (d,  $J = 5.0$  Hz, 1H), 6.57 (s, 0.33H), 5.27 (s, 1H), 5.22 (s, 1H), 5.16 (s, 0.33H), 5.12 (s, 0.33H), 3.84 (s, 1H), 3.75 (s, 3H), 1.91 (s, 1H), 1.48 (s, 3H) ppm.  $^{13}C$  NMR (126 MHz,  $CDCl_3$ )  $\delta$  168.8, 167.2, 142.7, 140.0, 139.6, 137.0, 134.3, 130.6, 128.6, 127.5, 125.7, 125.2, 124.1, 123.9, 123.7, 123.4, 120.9, 119.1, 51.3, 51.1, 19.6, 19.0 ppm. HRMS (ESI)  $[M+Na]^+$  calcd for  $C_{11}H_{12}O_2SNa$ : 231.0450, found: 231.0458.

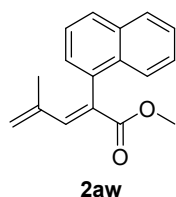

**2aw**: Prepared according to the general procedure above, and purified by a flash chromatography column with PE/EA (50:1, v/v) as the eluent. Colorless oil (19.2 mg, 76% yield,  $E/Z = 98:2$ ).  $^1H$  NMR (500 MHz,  $CDCl_3$ , for major isomer **E-2aw**)  $\delta$  7.86 (dd,  $J = 12.5, 5.0$  Hz, 2H), 7.76 (s, 1H), 7.72 (d,  $J = 8.5$  Hz, 1H), 7.50 – 7.43 (m, 3H), 7.30 (d,  $J = 7.0$  Hz, 1H), 5.31 (s, 1H), 5.16 (s, 1H), 3.66 (s, 3H), 1.13 (s, 3H) ppm.  $^{13}C$  NMR (126 MHz,  $CDCl_3$ , for major isomer **E-2aw**)  $\delta$  167.7, 143.5, 140.1, 132.8, 132.2, 131.7, 128.7, 127.3, 127.2, 126.7, 125.3, 124.8, 124.5, 123.9, 51.3, 19.4 ppm. HRMS (ESI)  $[M+Na]^+$  calcd for  $C_{17}H_{16}O_2Na$ : 275.1043, found: 275.1033.

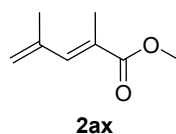

**2ax:** Prepared according to the general procedure above, and purified by a flash chromatography column with PE/EA (50:1, v/v) as the eluent. Colorless oil (8.4 mg, 60% yield, *E/Z* = 99:1). <sup>1</sup>H NMR (500 MHz, CDCl<sub>3</sub>) δ 7.10 (s, 1H), 5.21 (s, 1H), 5.06 (s, 1H), 3.75 (s, 3H), 2.01 (s, 3H), 1.93 (s, 3H) ppm. <sup>13</sup>C NMR (126 MHz, CDCl<sub>3</sub>) δ 168.3, 139.7, 139.7, 126.3, 118.7, 50.9, 21.8, 12.8 ppm. HRMS (ESI) [M+Na]<sup>+</sup> calcd for C<sub>8</sub>H<sub>12</sub>O<sub>2</sub>Na: 163.0730, found: 163.0735.

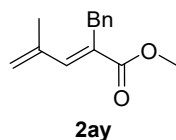

**2ay:** Prepared according to the general procedure above, and purified by a flash chromatography column with PE/EA (50:1, v/v) as the eluent. Colorless oil (20.7 mg, 96% yield, *E/Z* = 97:3). <sup>1</sup>H NMR (500 MHz, CDCl<sub>3</sub>, for major isomer **E-2ay**) δ 7.34 (s, 1H), 7.29 – 7.24 (m, 2H), 7.16 (dd, *J* = 13.5, 7.5 Hz, 3H), 5.19 – 5.16 (m, 1H), 5.12 (s, 1H), 3.90 (s, 2H), 3.70 – 3.67 (m, 3H), 1.95 (s, 3H), ppm. <sup>13</sup>C NMR (126 MHz, CDCl<sub>3</sub>, for major isomer **E-2ay**) δ 165.3, 139.3, 139.2, 134.6, 131.8, 125.5, 125.4, 124.2, 122.1, 78.91, 26.1, 19.4, 18.9 ppm. HRMS (ESI) [M+Na]<sup>+</sup> calcd for C<sub>14</sub>H<sub>16</sub>O<sub>2</sub>Na: 239.1043, found: 239.1040.

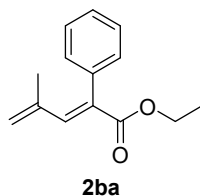

**2ba:** Prepared according to the general procedure above, and purified by a flash chromatography column with PE/EA (50:1, v/v) as the eluent. Colorless oil (17.1 mg, 79% yield, *E/Z* = 80:20). <sup>1</sup>H NMR (500 MHz, CDCl<sub>3</sub>) δ 7.47 (s, 1H), 7.39 (d, *J* = 8.0 Hz, 0.5H), 7.35 (d, *J* = 7.5 Hz, 0.5H), 7.32 (d, *J* = 6.0 Hz, 3H), 7.29 (s, 0.25H), 7.20 (d, *J* = 6.5 Hz, 2H), 6.54 (s, 0.25H), 5.25 (s, 1H), 5.19 (s, 1.25H), 5.13 (s, 0.25H), 4.32 (q, *J* = 7.0 Hz, 0.5H), 4.21 (q, *J* = 7.0 Hz, 2H), 1.96 (s, 0.75H), 1.39 (s, 3H), 1.34 (t, *J* = 7.1 Hz, 0.75H), 1.25 (t, *J* = 7.0 Hz, 3H) ppm. <sup>13</sup>C NMR (126 MHz, CDCl<sub>3</sub>) δ 169.6, 168.0, 142.4, 141.0, 140.9, 137.0, 136.1, 133.8, 132.6, 132.3, 130.1, 128.6, 128.1, 127.6, 127.5, 126.1, 124.7, 120.2, 61.2, 61.0, 21.2, 20.2, 14.2, 14.0 ppm. HRMS (ESI) [M+Na]<sup>+</sup> calcd for C<sub>14</sub>H<sub>16</sub>O<sub>2</sub>Na: 239.1043, found: 239.1039.

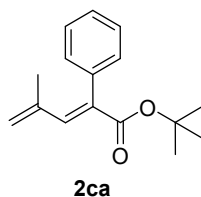

**2ca:** Prepared according to the general procedure above, and purified by a flash chromatography column with PE (50:1, v/v) as the eluent. Colorless oil (19.5 mg, 89% yield, *E/Z* = 80:20).  $^1\text{H}$  NMR (500 MHz,  $\text{CDCl}_3$ )  $\delta$  7.40 (d,  $J$  = 7.5 Hz, 0.6H), 7.36 (s, 1H), 7.33 (d,  $J$  = 8.0 Hz, 0.8H), 7.30 (d,  $J$  = 7.0 Hz, 3H), 7.18 (dd,  $J$  = 7.5, 1.5 Hz, 2H), 6.43 (s, 0.28H), 5.21 (s, 1H), 5.17 (s, 1H), 5.15 (s, 0.28H), 5.10 (s, 0.28H), 2.00 (s, 0.84H), 1.54 (s, 2.52H), 1.46 (s, 9H), 1.38 (s, 3H) ppm.  $^{13}\text{C}$  NMR (126 MHz,  $\text{CDCl}_3$ )  $\delta$  167.7, 141.5, 139.4, 138.9, 128.8, 127.4, 126.9, 124.9, 118.95, 51.0, 31.9, 21.5 ppm. HRMS (ESI)  $[\text{M}+\text{H}]^+$  calcd for  $\text{C}_{16}\text{H}_{21}\text{O}_2$ : 245.1536, found: 245.1532.

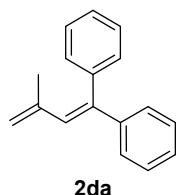

**2da:** Prepared according to the general procedure above, and purified by a flash chromatography column with PE as the eluent. White solid (7.9 mg, 36% yield). Melting point: 35.1-38.6 °C.  $^1\text{H}$  NMR (500 MHz,  $\text{CDCl}_3$ )  $\delta$  7.34 – 7.32 (m, 3H), 7.26 – 7.20 (m, 7H), 6.66 (s, 1H), 5.00 (s, 1H), 4.96 (s, 1H), 1.48 (s, 3H) ppm.  $^{13}\text{C}$  NMR (126 MHz,  $\text{CDCl}_3$ )  $\delta$  143.3, 142.4, 141.5, 140.7, 130.7, 130.3, 128.1, 127.9, 127.5, 127.2, 119.1, 22.1 ppm. HRMS (ESI)  $[\text{M}+\text{Na}]^+$  calcd for  $\text{C}_{17}\text{H}_{16}\text{Na}$ : 243.1144, found: 243.1145.

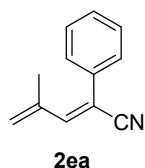

**2ea:** Prepared according to the general procedure above, and purified by a flash chromatography column with PE/EA (50:1, v/v) as the eluent. Colorless oil (6.2 mg, 37% yield, *E/Z* 99:1).  $^1\text{H}$  NMR (500 MHz,  $d^6$ -DMSO)  $\delta$  7.65 – 7.60 (m, 2H), 7.53 (s, 1H), 7.46 – 7.38 (m, 3H), 5.65 (s, 1H), 5.50 (s, 1H), 2.17 (s, 3H) ppm.  $^{13}\text{C}$  NMR (126 MHz,  $d^6$ -DMSO)  $\delta$  145.7, 140.5, 134.4, 129.6, 127.8, 126.3, 118.1, 110.1, 20.4 ppm. HRMS (ESI)  $[\text{M}+\text{H}]^+$  calcd for  $\text{C}_{12}\text{H}_{12}\text{N}$ : 170.0964, found: 170.0965.

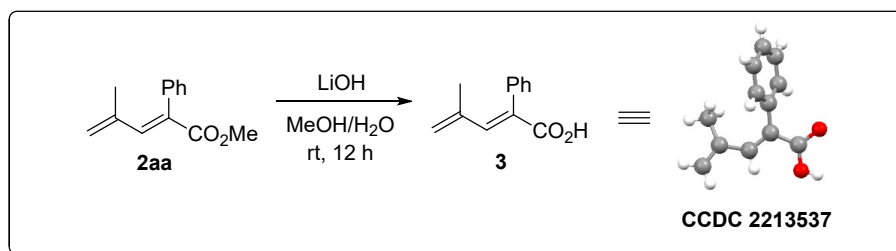

**C) Synthesis of hydrolysis product 3 (CCDC 2213537):** To a flame dried round bottom flask was added compound **2aa** (0.1 mmol) and LiOH (0.2 mmol). Then 1.1ml MeOH-H<sub>2</sub>O (0.09M, 10:1) was added at room temperature and the reaction mixture was then stirred overnight. The mixture was acidified with hydrochloric acid after the completion of the reaction. Then the reaction mixture was extracted with EtOAc, dried over anhydrous sodium sulfate, concentrated under vacuum and purified by flash column chromatography with PE/EtOAc (2:1, v/v) to afford the corresponding product **3** in 92% yield as a white solid. Melting point: 91.2-105.3 °C. <sup>1</sup>H NMR (500 MHz, CDCl<sub>3</sub>) δ 7.57 (s, 1H), 7.33 – 7.32 (m, 3H), 7.20 – 7.19 (m, 2H), 5.30 (s, 1H), 5.25 (s, 1H), 1.38 (s, 3H) ppm. <sup>13</sup>C NMR (126 MHz, CDCl<sub>3</sub>) δ 144.7, 141.0, 135.4, 132.5, 131.1, 130.1, 127.8, 127.7, 126.1, 21.1 ppm. HRMS (ESI) [M+H]<sup>+</sup> calcd for C<sub>12</sub>H<sub>13</sub>O<sub>2</sub>: 189.0910, found: 189.0910.

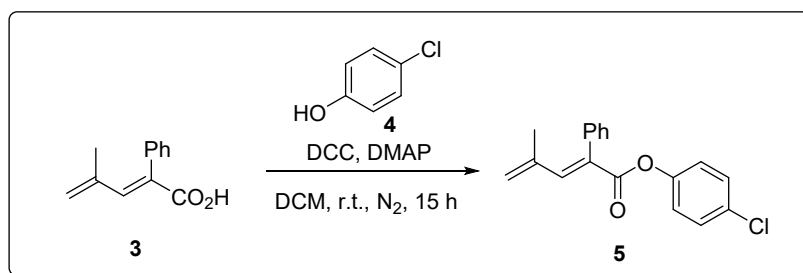

**D) Synthesis of esterification product 5:** Under nitrogen atmosphere, to an oven-dried round-bottom flask was added compound **3** (1 equiv), 4-ClC<sub>6</sub>H<sub>4</sub>OH **4** (0.8 equiv.), 4-dimethylaminopyridine (0.1 equiv.) and dichloromethane (0.5 mmol/ml). Then the reaction mixture was cooled to 0 °C and N,N-dicyclohexylcarbodiimide (0.8 equiv) was added. The reaction mixture was allowed to stir at ambient temperature overnight. After that, the reaction mixture was quenched with aqueous NaHCO<sub>3</sub>, extracted with EtOAc, dried over anhydrous sodium sulfate, concentrated the mixture under vacuum and then purified by flash column chromatography with PE/EA (50:1, v/v) to afford a white solid **5** in 86% yield. Melting point: 65.5-75.4 °C. <sup>1</sup>H NMR (500 MHz, CDCl<sub>3</sub>): δ 7.67 (s, 1H), 7.38 – 7.36 (m, 3H), 7.34 – 7.29 (m, 4H), 7.05 (d, *J* = 8.5 Hz, 2H), 5.36 (s, 1H), 5.29 (s, 1H), 1.44 (s, 3H) ppm. <sup>13</sup>C NMR (126 MHz, CDCl<sub>3</sub>): δ 165.2, 148.6, 143.6, 139.9, 134.4, 130.0, 130.0, 129.1, 128.3, 126.9, 126.8, 125.2, 121.9, 20.1 ppm. HRMS (ESI) [M+Na]<sup>+</sup> calcd for C<sub>18</sub>H<sub>15</sub>ClO<sub>2</sub>Na: 321.0653, found: 321.0651.

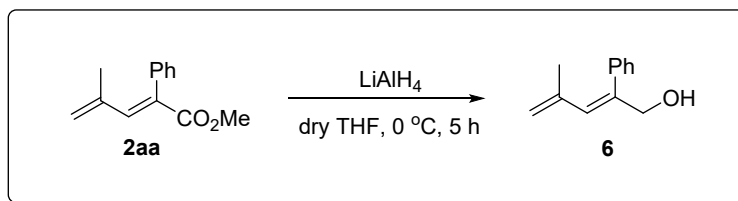

**E) Synthesis of reduction product 6:** Compound **2aa** was dissolved in THF (0.25 M), and the resulting solution was cooled to 0 °C. LiAlH<sub>4</sub> (1.5 equiv) was added portion wise, and the resulting mixture was allowed to stir for 5h. The reaction mixture was quenched by Fieser method, filtered through celite, and concentrated in vacuo. The residue was purified by column chromatography with PE/EA (3:1, v/v) to afford the colorless oil **6** in 52% yield. <sup>1</sup>H NMR (500 MHz, CDCl<sub>3</sub>) δ 7.37 – 7.30 (m, 3H), 7.24 (d, *J* = 7.0 Hz, 2H), 6.34 (s, 1H), 4.94 (s, 1H), 4.92 (s, 1H), 4.34 (s, 2H), 1.46 (s, 3H) ppm. <sup>13</sup>C NMR (126 MHz, CDCl<sub>3</sub>) δ 140.5, 139.7, 138.1, 128.0, 127.9, 127.1, 126.3, 117.2, 67.9, 21.1 ppm. HRMS (ESI) [M+Na]<sup>+</sup> calcd for C<sub>12</sub>H<sub>14</sub>Na: 197.0937, found: 197.0939.

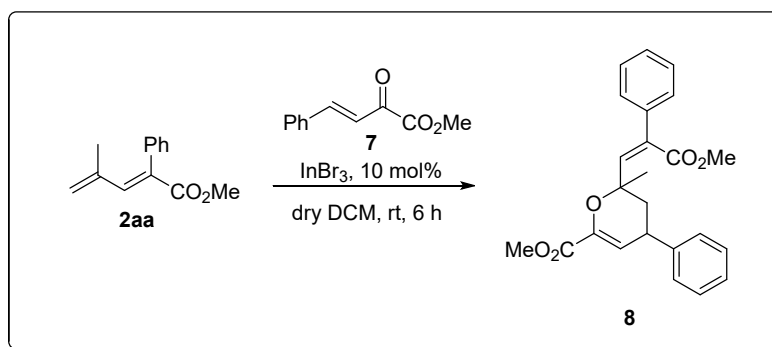

**F) Synthesis of product 8:** Under a nitrogen atmosphere, to an oven-dried 10 mL Schlenk flask equipped with a stirring bar was added **2aa** (0.1 mmol), **7** (0.1 mmol),  $\text{InBr}_3$  (10 mol%) and dry DCM (1.0 mL). The resultant mixture was degassed three times by freeze-pump-thaw cycles. The reaction mixture was stirred at room temperature for 6 hours, then purified by flash column chromatography on silica gel eluting with petroleum ether/ethyl acetate (10:1, v:v), giving the colorless oil **8** in 58% yield (*d.r.* = 2:1).  $^1\text{H}$  NMR (500 MHz,  $\text{CDCl}_3$ )  $\delta$  7.34 – 7.28 (m, 5H), 7.26 – 7.19 (m, 2H), 7.15 (s, 0.7H), 7.13 – 7.08 (m, 3H), 7.07 (s, 0.3H), 6.07 (d,  $J$  = 1.5 Hz, 1H), 3.72 (s, 3H), 3.65 (d,  $J$  = 12.0 Hz, 3H), 3.55 – 3.48 (m, 0.3H), 3.46 – 3.42 (m, 0.7H), 1.98 (dd,  $J$  = 13.5, 6.0 Hz, 0.3H), 2.00 – 1.81 (m, 1.7H), 1.55 (s, 1H), 1.28 (s, 2H) ppm.  $^{13}\text{C}$  NMR (126 MHz,  $\text{CDCl}_3$ )  $\delta$  167.7, 163.2, 162.9, 146.7, 145.7, 143.1, 142.9, 142.7, 142.3, 134.9, 134.4, 134.2, 133.3, 129.6, 129.4, 128.8, 128.7, 128.6, 127.7, 127.7, 127.7, 127.6, 127.2, 126.9, 126.2, 114.1, 112.2, 78.8, 78.2, 52.5, 52.3, 52.1, 52.0, 41.3, 40.2, 36.7, 35.6, 28.3, 23.4 ppm. HRMS (ESI)  $[\text{M}+\text{Na}]^+$  calcd for  $\text{C}_{24}\text{H}_{24}\text{O}_5\text{Na}$ : 415.1516, found: 415.1511.

## G) Synthesis 1aa[d]

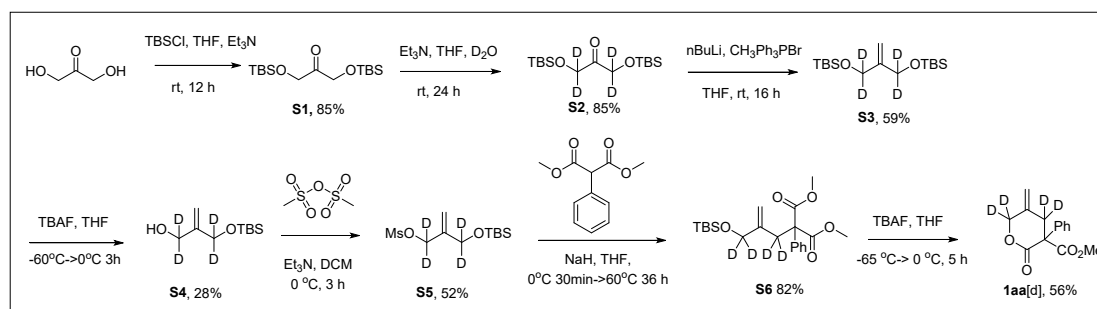

**a) Synthesis of S1:** Triethylamine (32 mL, 230 mmol) was added to a solution of 1,3-Dihydroxyacetone (10.0 g, 110 mmol) in THF (250 mL) at 0 °C. TBSCl (34.5 g, 230 mmol) was slowly added to the mixture and this was stirred for 12 h at room temperature. After dilution with water, this was extracted with EtOAc (5 times). The organic layer was washed with saturated NaCl aq, dried over Na<sub>2</sub>SO<sub>4</sub> and concentrated under vacuum. The residue was chromatographed on silica gel with EtOAc/PE (1:200, v/v) to afford **S1** as a colorless oil (30.0 g, 94.3 mmol; 85% yield).

**b) Synthesis of S2:** Add D<sub>2</sub>O (10 mL, 0.5 mol) and Et<sub>3</sub>N (60 mL, 432.5 mmol) to a solution of **S1** (30.0 g, 94.3 mmol) in THF (250 mL). Stir the solution at room temperature for 24 hours and subsequently reduced to a minimum volume. Treat the residue two more times (3 times in total) under the same conditions with the same reagents to obtain the residue. After dilution with water, this was extracted with EtOAc (5 times). The organic layer was washed with saturated NaCl aq, dried over Na<sub>2</sub>SO<sub>4</sub> and concentrated under vacuum. The residue was chromatographed on silica gel with EtOAc/PE (1:200, v/v) to afford **S2** as a colorless oil (25.6 g, 80.2 mmol; 85% yield, >85% D).

**c) Synthesis of S3:** To a flask charged with methyltriphenylphosphonium bromide (57 g, 160 mmol) in 250 mL of anhydrous THF at 0 °C was added *n*-butyllithium (64 mL, 2.5 M in hexanes, 160 mmol). The reaction was allowed to warm to room temperature spontaneously and then stirred for 1 h. **S2** (25.6 g, 80.2 mmol) in anhydrous THF (50 mL) was added dropwise at room temperature. After stirring for 9 h, the reaction mixture was quenched with saturated aqueous NH<sub>4</sub>Cl, and then extracted with EtOAc for (3 times). The combined organic layer was washed with brine and dried over

anhydrous Na<sub>2</sub>SO<sub>4</sub>. After filtration, the solvent was removed under reduced pressure, and the residue was purified by column chromatography on silica gel with EtOAc/PE (1:400, v/v) to afford **S3** as a colorless oil (15.2 g, 47.5 mmol; 59% yield).

**d) Synthesis of S4:** TBAF (47.5 mL, 47.5 mmol; 1.0 M solution in THF) was slowly added to a solution of **S3** (15.2 g, 47.5 mmol) in THF (110 mL) at -78 °C. The mixture was stirred for 3 h while gradually raising the temperature to 0 °C, and the reaction was quenched with water. After extraction with EtOAc, the organic layer was washed with saturated NaCl aq, dried over Na<sub>2</sub>SO<sub>4</sub> and concentrated under vacuum. The residue was chromatographed on silica gel with EtOAc/PE (1:8, v/v) to afford **S4** as a colorless oil (2.52 g, 13.3 mmol; 28% yield).

**e) Synthesis of S5:** Triethylamine (2.42 mL, 17.5 mmol) was added to a solution of **S4** (2.52 g, 13.3 mmol) in CH<sub>2</sub>Cl<sub>2</sub> (10 mL) at 0 °C. Methanesulfonic anhydride (2.63 g, 15.1 mmol) was slowly added to the mixture and this was stirred for 1 h at 0 °C. Add another part of methanesulfonic anhydride (0.1 equivt) and triethylamine (0.2 equiv). The reaction was quenched with saturated NaHCO<sub>3</sub> aq and extracted with CH<sub>2</sub>Cl<sub>2</sub>. The organic layer was dried over Na<sub>2</sub>SO<sub>4</sub> and concentrated under vacuum. The residue was chromatographed on silica gel with EtOAc/PE (1/8, v/v) to afford **S5** as a colorless oil (1.95 g, 6.92 mmol; 52% yield).

**f) Synthesis of S6:** A solution of dimethyl phenylmalonate (1.26 g, 6.0 mmol) in THF (9 mL) was added to a suspension of NaH (252 mg, 6.3 mmol; 60 wt% in mineral oil) in THF (3 mL) at 0 °C. The mixture was stirred for 15 min at 0 °C and a solution of **S5** (1.95 g, 6.92 mmol) in THF (12 mL) was added to it. The resulting mixture was stirred for 36 h at 60 °C and was quenched with water. After extraction with EtOAc, the organic layer was washed with NaCl (saturated aqueous), dried over Na<sub>2</sub>SO<sub>4</sub>, filtered, and concentrated under vacuum. The residue was chromatographed on silica gel with EtOAc/PE (1/15, v/v) to afford **S6** as a colorless oil (2.25 g, 5.67 mmol; 82% yield).

**g) Synthesis of 1aa[d]:** TBAF (6.26 mL, 6.26 mmol; 1.0 M solution in THF) was added to a solution of **S6** (2.25 g, 5.67 mmol) in THF (14.5 mL) at -65 °C. The mixture was stirred for 4.5 h while gradually raising the temperature to 0 °C and the reaction was

quenched with water. After extraction with EtOAc, the organic layer was washed with NaCl (saturated aqueous), dried over Na<sub>2</sub>SO<sub>4</sub>, filtered, and concentrated under vacuum. The residue was chromatographed on silica gel with EtOAc/PE (1:5 to 1:3) to afford **1aa[d]** as a white solid (790 mg, 3.16 mmol; 56% yield, >85% D).

**<sup>1</sup>H NMR of 1aa[d]:**

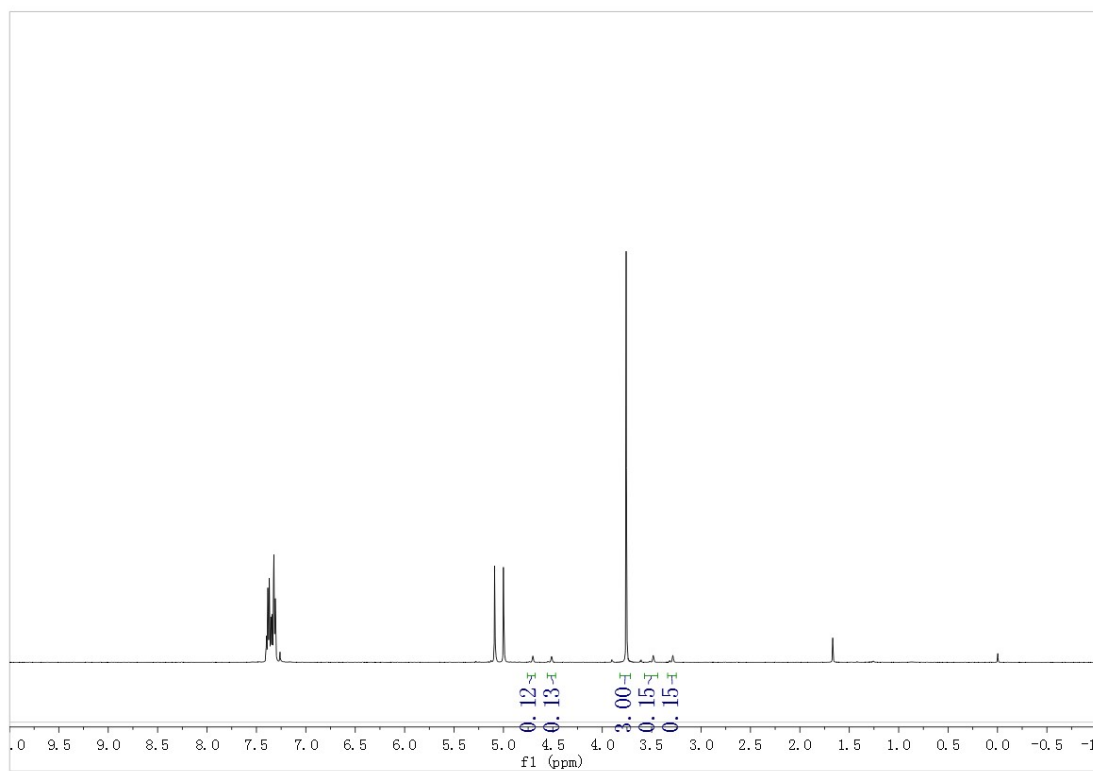

#### IV. Control Experiments

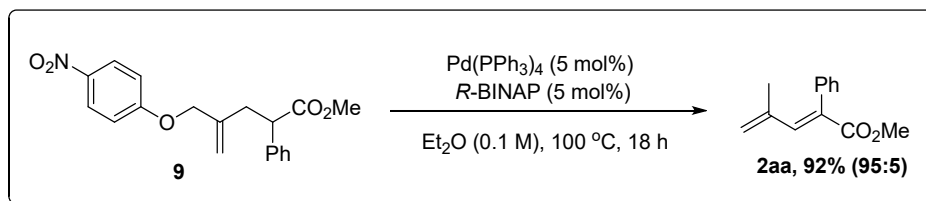

**A)  $\text{Pd(PPh}_3)_4$  catalyzed reaction of compound **9** as starting material:** Under a nitrogen atmosphere, to an oven dried 10 mL Schlenk flask equipped with a stirring bar was added compound **9** (0.1 mmol),  $\text{Pd(PPh}_3)_4$  (5 mol %),  $R\text{-BINAP}$  (5 mol %) and dry  $\text{Et}_2\text{O}$  (1.0 mL). The resultant mixture was degassed three times by freeze-pump-thaw cycles, and then stirred at  $100\text{ }^\circ\text{C}$  for 18 h. The reaction mixture was purified by flash column chromatography on silica gel eluting with petroleum ether/ethyl acetate, giving the corresponding product **2aa** (92% yield, 95:5 *E/Z*).

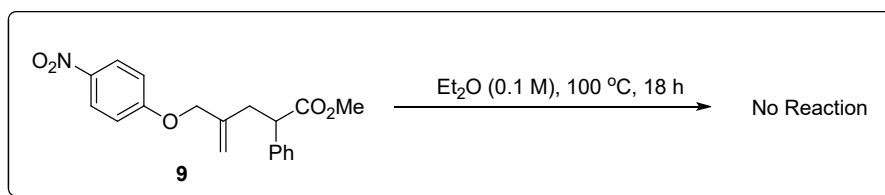

**B) Reaction of 9 in the absence of  $\text{Pd}(\text{PPh}_3)_4$  and *R*-BINAPL** Under a nitrogen atmosphere, to an oven dried 10 mL Schlenck flask equipped with a stirring bar was added compound **9** (0.1 mmol) and dry  $\text{Et}_2\text{O}$  (1.0 mL). The resultant mixture was degassed three times by freeze-pump-thaw cycles, and then stirred at  $100\text{ }^\circ\text{C}$  for 18 h, and no reaction was observed.

### C) Deuterium-labeling experiment

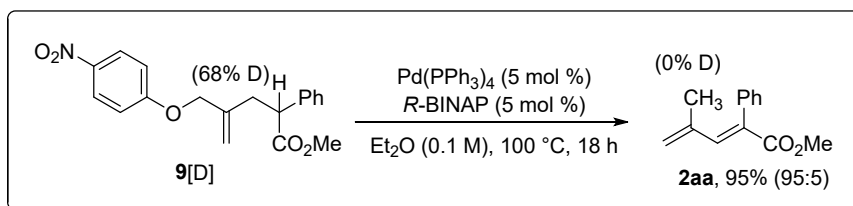

**a) With allyl phenyl ether 9[D]:** Under a nitrogen atmosphere, to an oven dried 10 mL Schlenck flask equipped with a stirring bar was added compound **9[D]** (0.1 mmol),  $\text{Pd(PPh}_3)_4$  (5 mol %),  $R\text{-BINAP}$  (5 mol %) and dry  $\text{Et}_2\text{O}$  (1.0 mL). The resultant mixture was degassed three times by freeze-pump-thaw cycles, and then stirred at 100 °C for 18 h. The reaction mixture was purified by flash column chromatography on silica gel eluting with petroleum ether/ethyl acetate, giving the corresponding product **2aa** (95% yield, 95:5 *E/Z*).

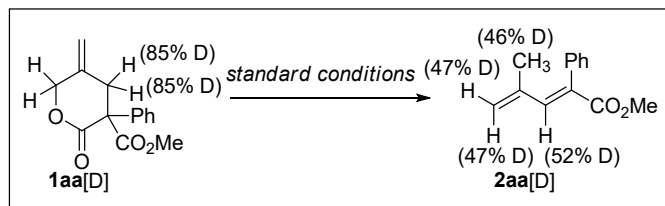

**b) With  $\gamma$ -methylidene- $\delta$ -valerolactone **1aa[D]**:** Under a nitrogen atmosphere, to an oven dried 10 mL Schlenk flask equipped with a stirring bar was added compound **1aa[D]** (0.1 mmol),  $\text{Pd}(\text{PPh}_3)_4$  (5 mol %), *R*-BINAP (5 mol %) and dry  $\text{Et}_2\text{O}$  (1.0 mL). The resultant mixture was degassed three times by freeze-pump-thaw cycles, and then stirred at 100 °C for 18 h. The reaction mixture was purified by flash column chromatography on silica gel eluting with petroleum ether/ethyl acetate (50:1, v/v), giving the corresponding product **2aa[D]** in 92% yield.

**$^1\text{H}$  NMR of **2aa[D]**:**

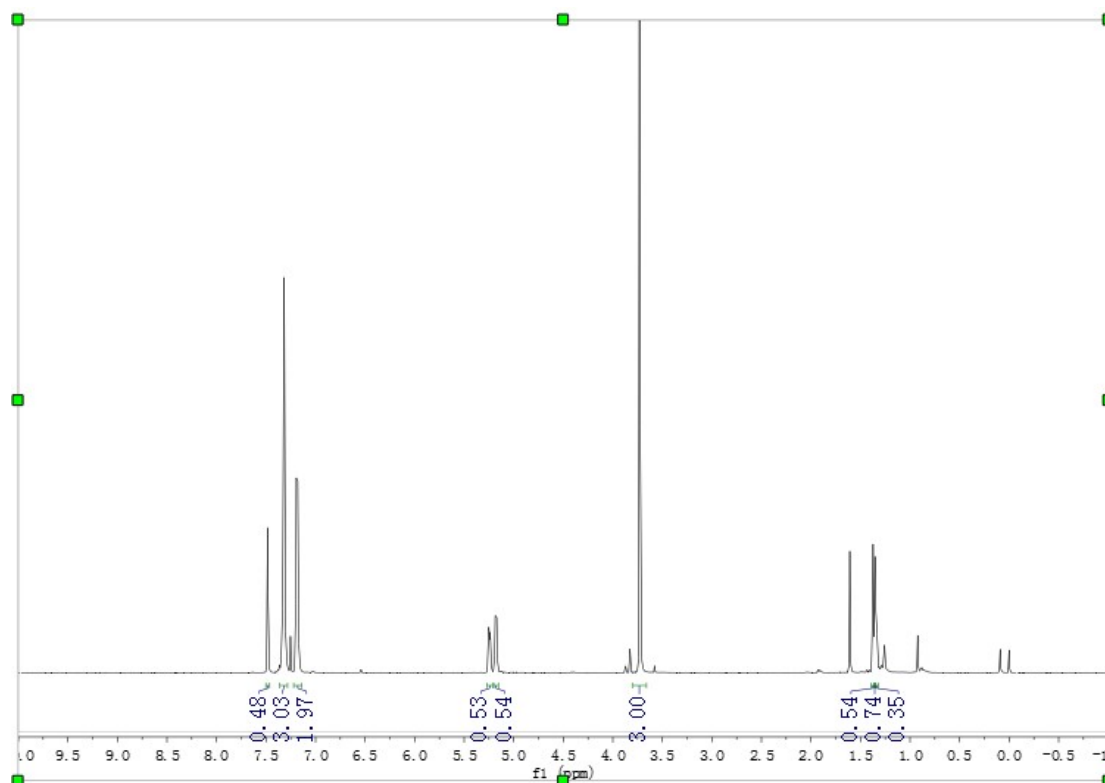

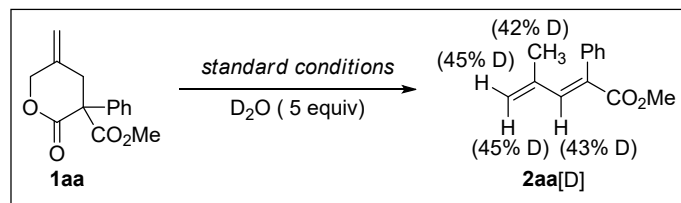

**c) With  $D_2O$  under the standard condition:** Under a nitrogen atmosphere, to an oven dried 10 mL Schlenk flask equipped with a stirring bar was added compound **1aa** (0.1 mmol),  $Pd(PPh_3)_4$  (5 mol %), *R*-BINAP (5 mol %),  $D_2O$  (0.5 mmol) and dry  $Et_2O$  (1.0 mL). The resultant mixture was degassed three times by freeze-pump-thaw cycles, and then stirred at 100 °C for 18 h. The reaction mixture was purified by flash column chromatography on silica gel eluting with petroleum ether/ethyl acetate (50:1, v/v), giving the corresponding product **2aa[D]** in 85% yield.

**$^1H$  NMR of **2aa[D]**:**

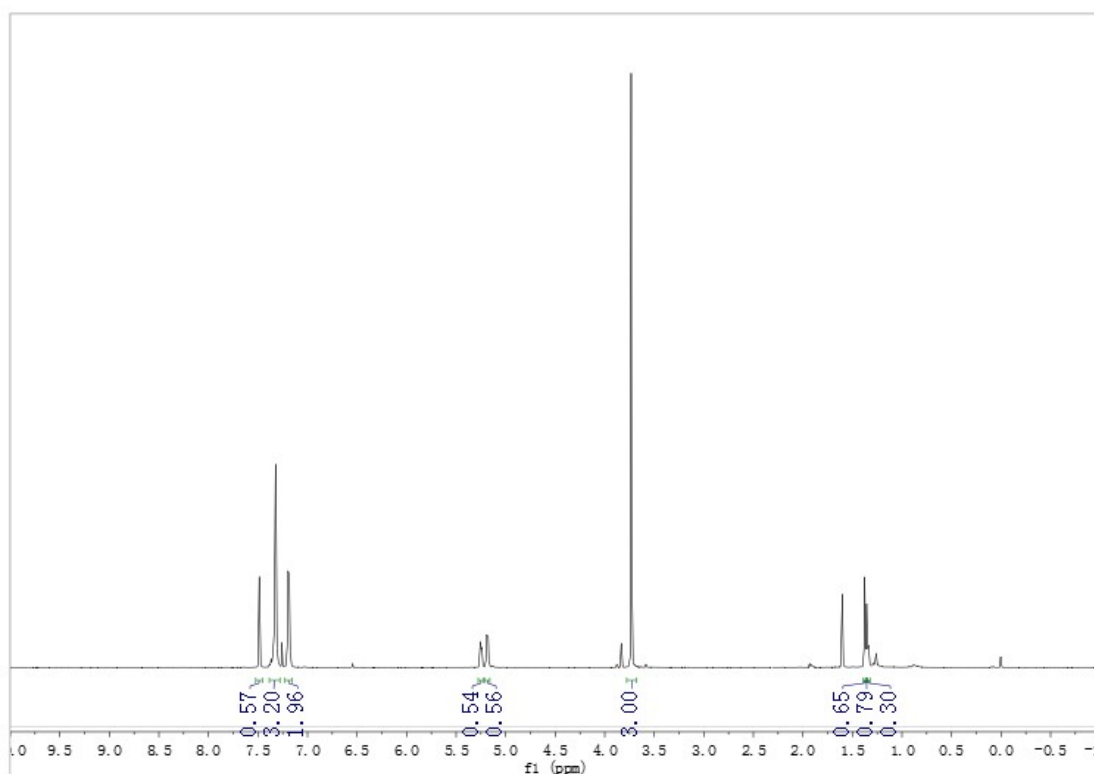

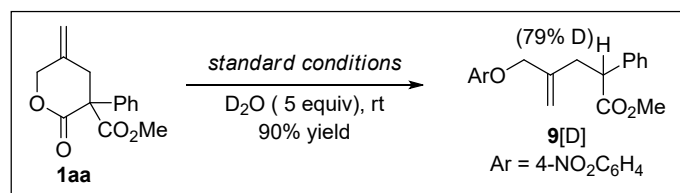

**d) With  $\text{D}_2\text{O}$  at room temperature under the standard condition:** Under a nitrogen atmosphere, to an oven dried 10 mL Schlenk flask equipped with a stirring bar was added compound **1aa** (0.1 mmol),  $\text{Pd}(\text{PPh}_3)_4$  (5 mol %), *R*-BINAP (5 mol %),  $\text{D}_2\text{O}$  (0.5 mmol) and dry  $\text{Et}_2\text{O}$  (1.0 mL). The resultant mixture was degassed three times by freeze-pump-thaw cycles, and then stirred at room temperature for 12 h. The reaction mixture was purified by flash column chromatography on silica gel eluting with petroleum ether/ethyl acetate (50:1, v/v), giving the corresponding product **9[D]** in 90% yield.

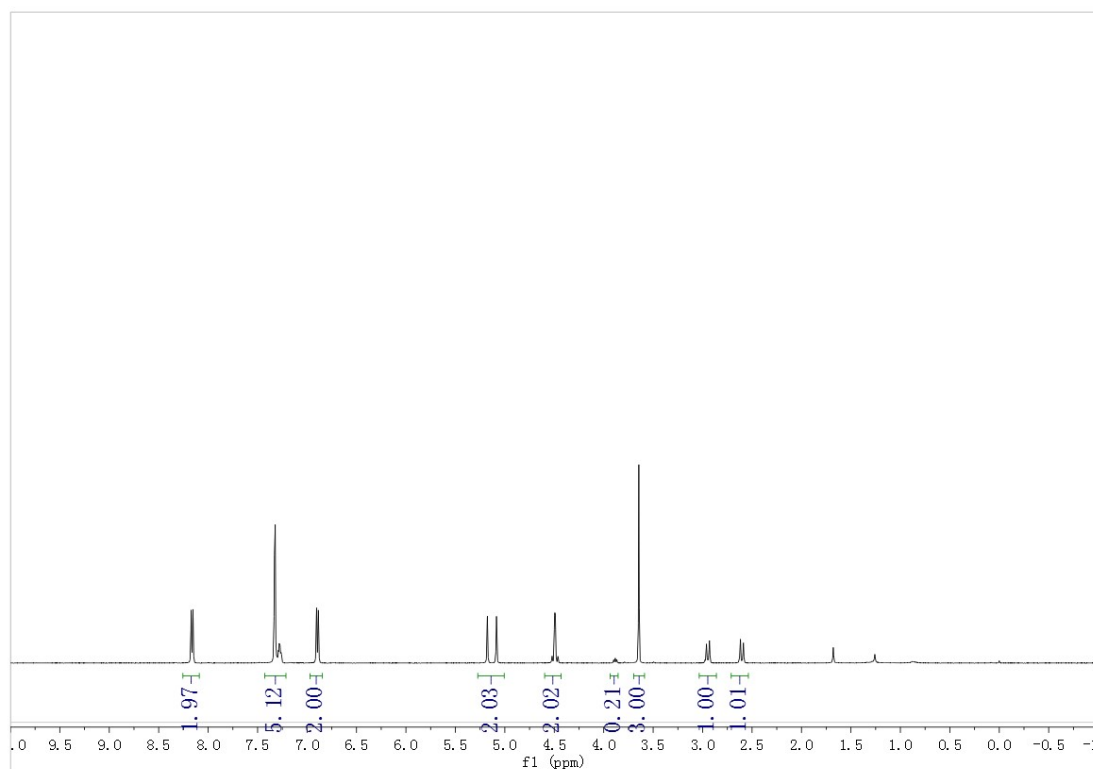

## V. X-ray Crystal Data

### A) X-Ray Structure of product 3 (CCDC 2213537)

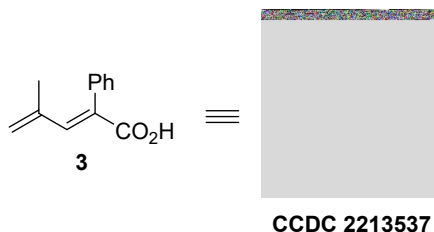

**Table S3** Crystal data and structure refinement for **3**

|                                             |                                                |
|---------------------------------------------|------------------------------------------------|
| Empirical formula                           | C <sub>12</sub> H <sub>12</sub> O <sub>2</sub> |
| Formula weight                              | 188.22                                         |
| Temperature/K                               | 298(2)                                         |
| Crystal system                              | Monoclinic                                     |
| Space group                                 | P2(1)/c                                        |
| a/Å                                         | 8.8302(8)                                      |
| b/Å                                         | 5.8264(6)                                      |
| c/Å                                         | 20.742(2)                                      |
| α/°                                         | 90.00                                          |
| β/°                                         | 98.926(2)                                      |
| γ/°                                         | 90.00                                          |
| Volume/Å <sup>3</sup>                       | 1054.24(18)                                    |
| Z                                           | 4                                              |
| ρ <sub>calc</sub> /cm <sup>3</sup>          | 1.186 Mg/m <sup>3</sup>                        |
| μ/mm <sup>-1</sup>                          | 0.080 mm <sup>-1</sup>                         |
| F(000)                                      | 400                                            |
| Crystal size/mm <sup>3</sup>                | 0.30 x 0.15 x 0.04 mm                          |
| Radiation                                   | MoKα(λ = 0.71073)                              |
| 2θ range for data collection/°              | 1.99 to 25.01                                  |
| Index ranges                                | -10 ≤ h ≤ 10, -6 ≤ k ≤ 6, -19 ≤ l ≤ 24         |
| Reflections collected                       | 4869                                           |
| Independent reflections                     | 1852 [R(int) = 0.1283]                         |
| Data/restraints/parameters                  | 1852 / 0 / 129                                 |
| Goodness-of-fit on F <sup>2</sup>           | 0.985                                          |
| Final R indexes [I > 2σ(I)]                 | R1 = 0.0702, wR2 = 0.1352                      |
| Final R indexes [all data]                  | R1 = 0.1774, wR2 = 0.1669                      |
| Largest diff. peak/hole / e Å <sup>-3</sup> | 0.176 and -0.162 e.Å <sup>-3</sup>             |
| Flack parameter                             | 0.054(6)                                       |

## VI. Reference

1. R. Shintani, M. Murakami, T. Hayashi,  $\gamma$ -Methylidene- $\delta$ -valerolactones as a Coupling Partner for Cycloaddition: Palladium-Catalyzed [4 + 3] Cycloaddition with Nitrones, *J. Am. Chem. Soc.*, 2007, **129**, 12356-12357.
2. R. Shintani, M. Murakami, T. Hayashi, Stereoselective Synthesis of Nipectic Acid Derivatives via Palladium-Catalyzed Decarboxylative Cyclization of  $\gamma$ -Methylidene- $\delta$ -valerolactones with Imines, *Org. Lett.*, 2009, **11**, 457-459.
3. S. Park, R. Shintani, T. Hayashi, Palladium-catalyzed Decarboxylative [4+1] Cyclization of  $\gamma$ -Methylidene- $\delta$ -valerolactones with Isocyanides, *Chem. Lett.*, 2009, **38**, 204-205.
4. R. Shintani, R. K. Ikehata, T. Hayashi, Synthesis of Nine-Membered Azlactones by Palladium-Catalyzed Ring-Expansion of  $\gamma$ -Methylidene- $\delta$ -valerolactones with Aziridines, *J. Org. Chem.*, 2011, **76**, 4776-4780.
5. C. Gao, X. Wang, J. Liu, X. Li, Highly Diastereo- and Enantioselective Synthesis of Tetrahydrobenzo[b]azocines via Palladium-Catalyzed [4+4] Cycloaddition. *ACS Catal.*, 2021, **11**, 2684-2690.
6. R. T. Davison, P. D. Parker, Vy M. Dong, Enantioselective Addition of  $\alpha$ -Nitroesters to Alkynes. *Angew. Chem. Int. Ed.* 2021, **60**, 4599-4603.

## VII. NMR Spectrum

**1as:**

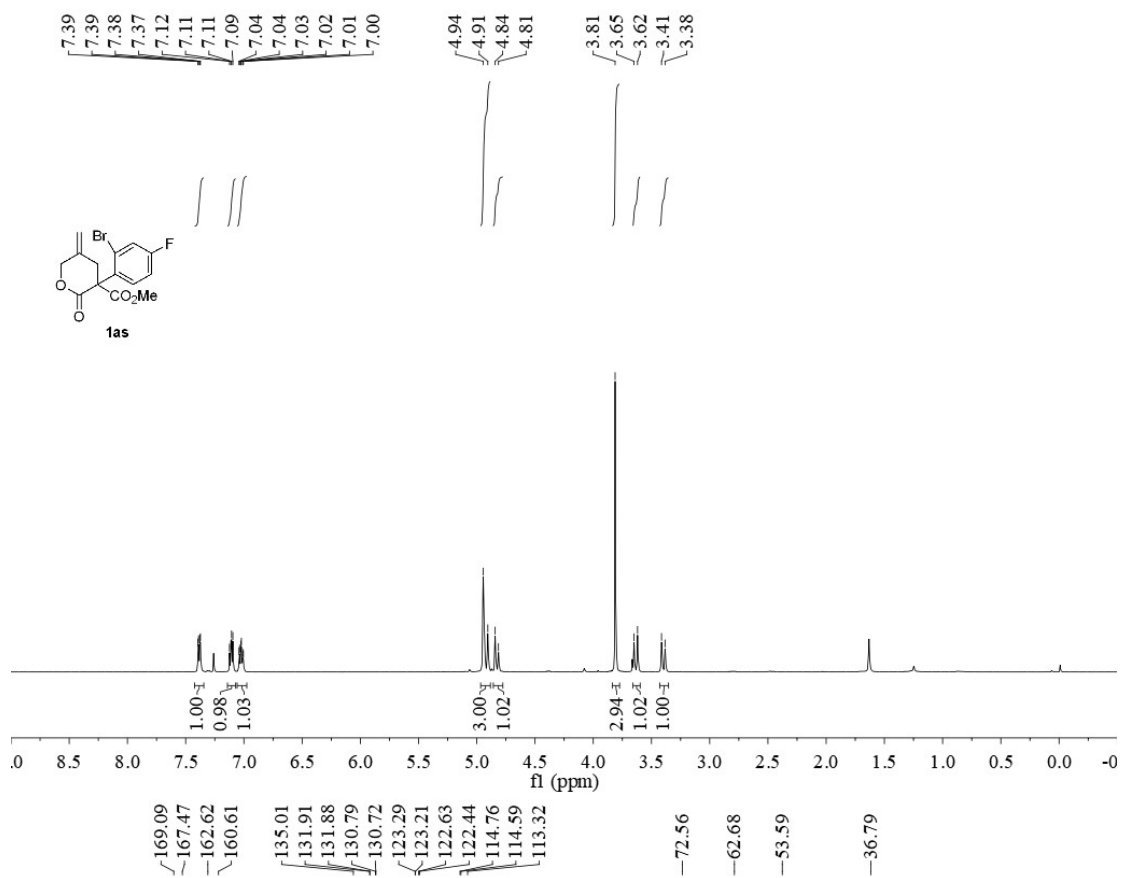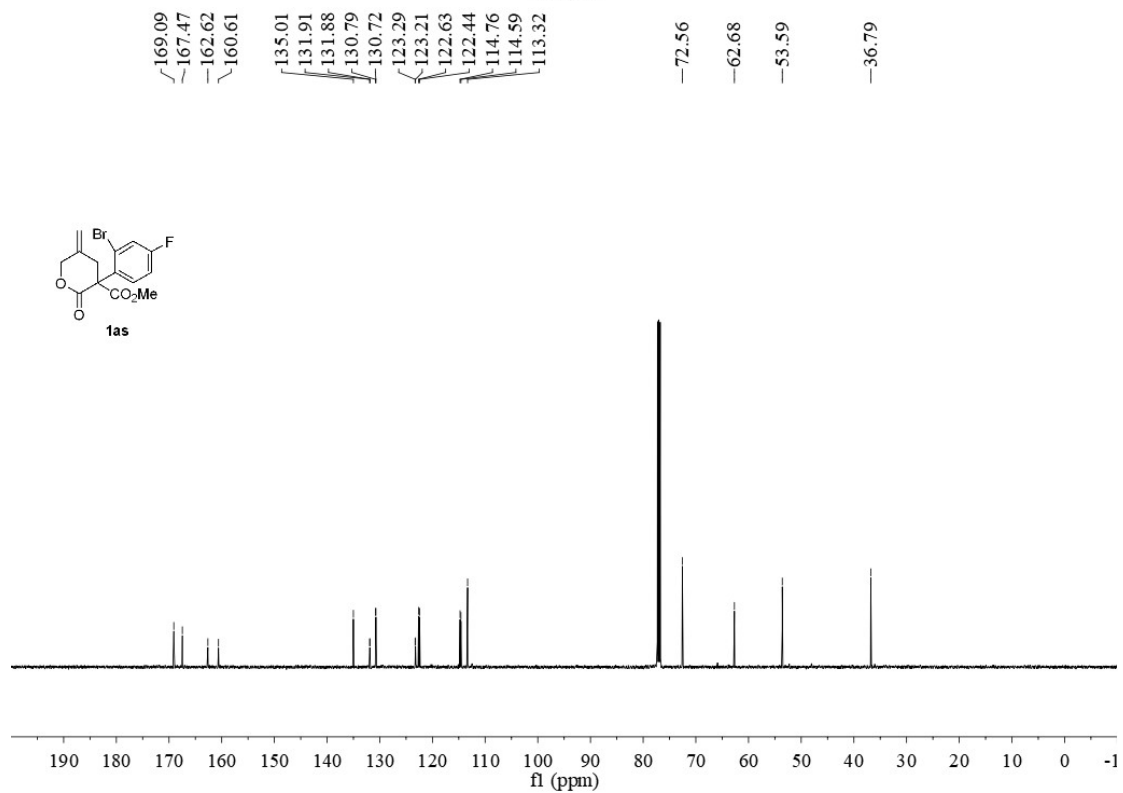

**1au:**

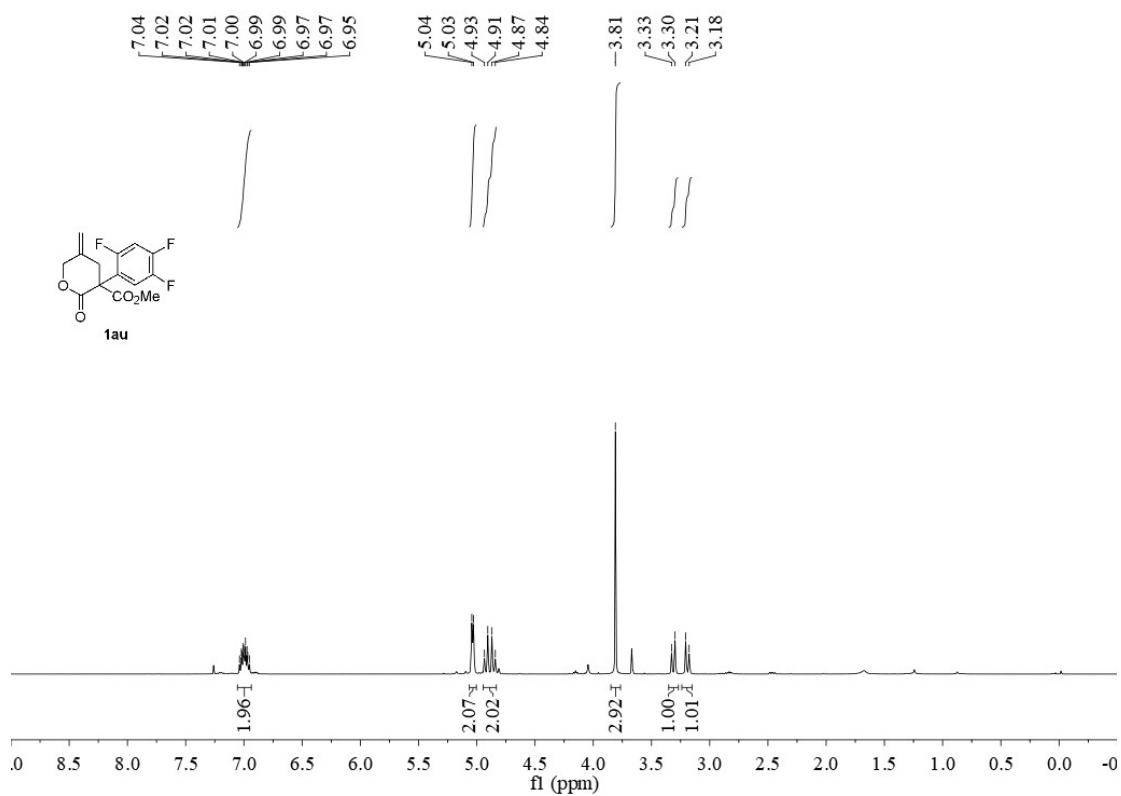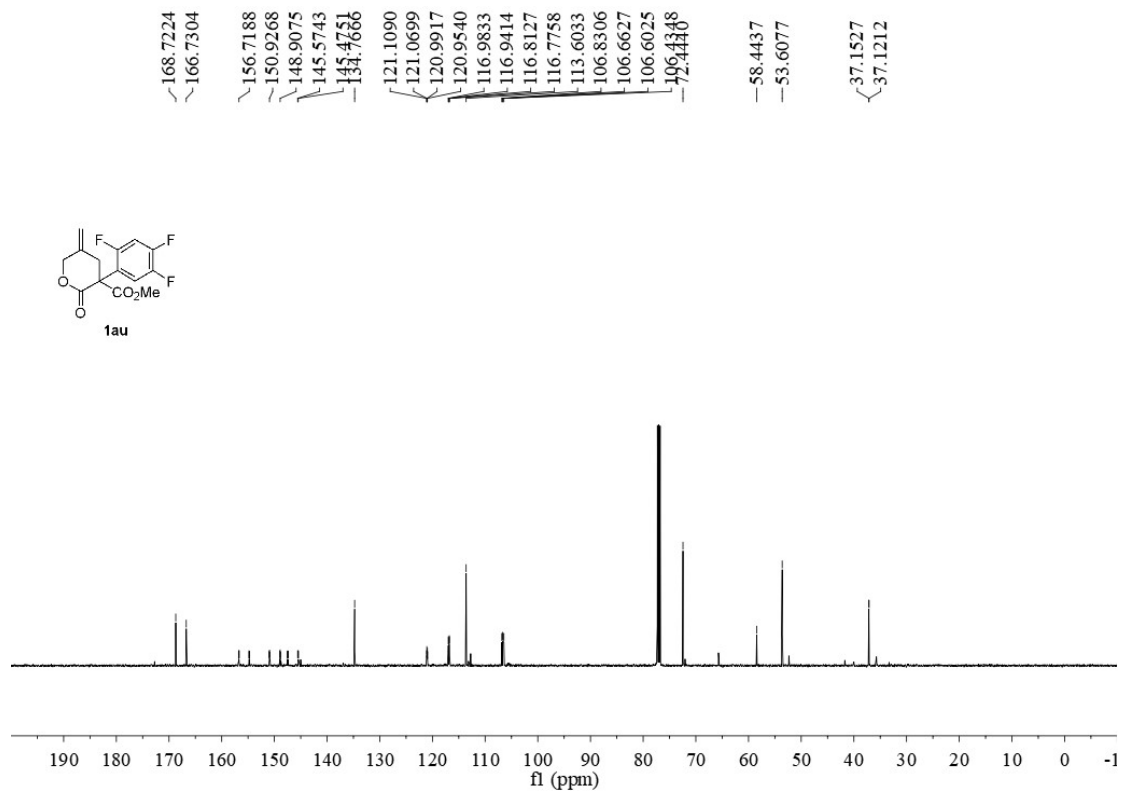

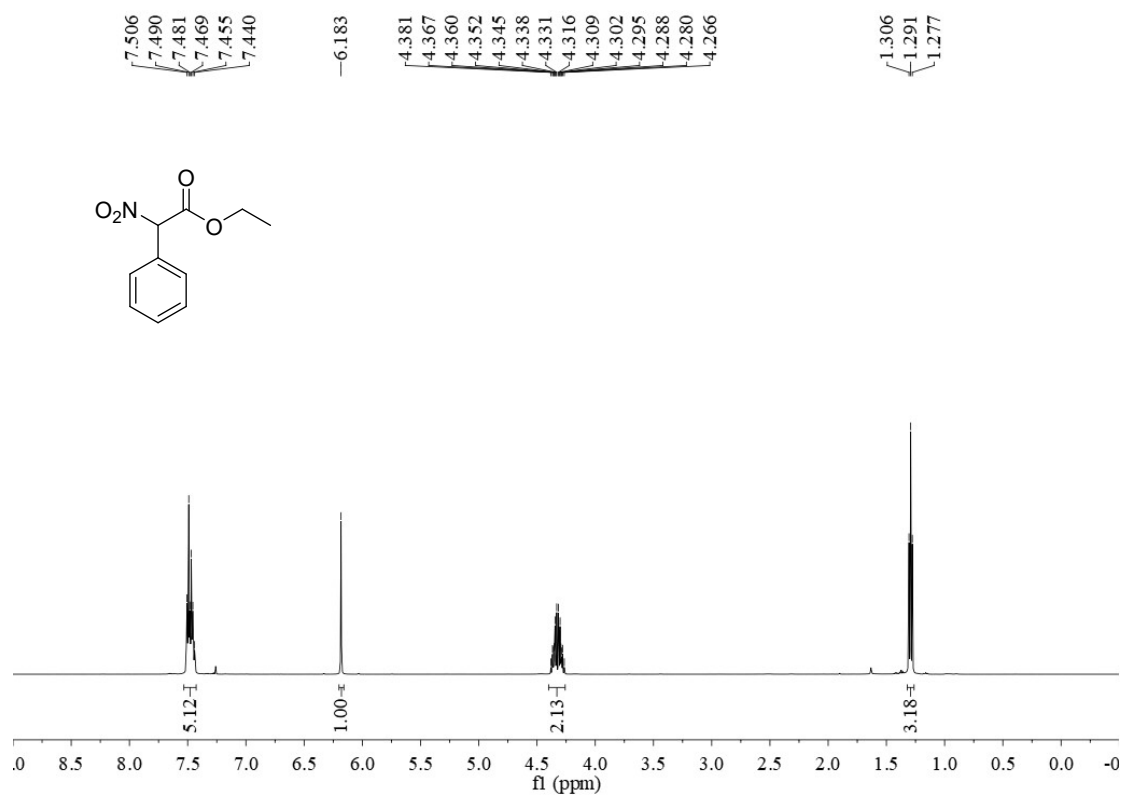



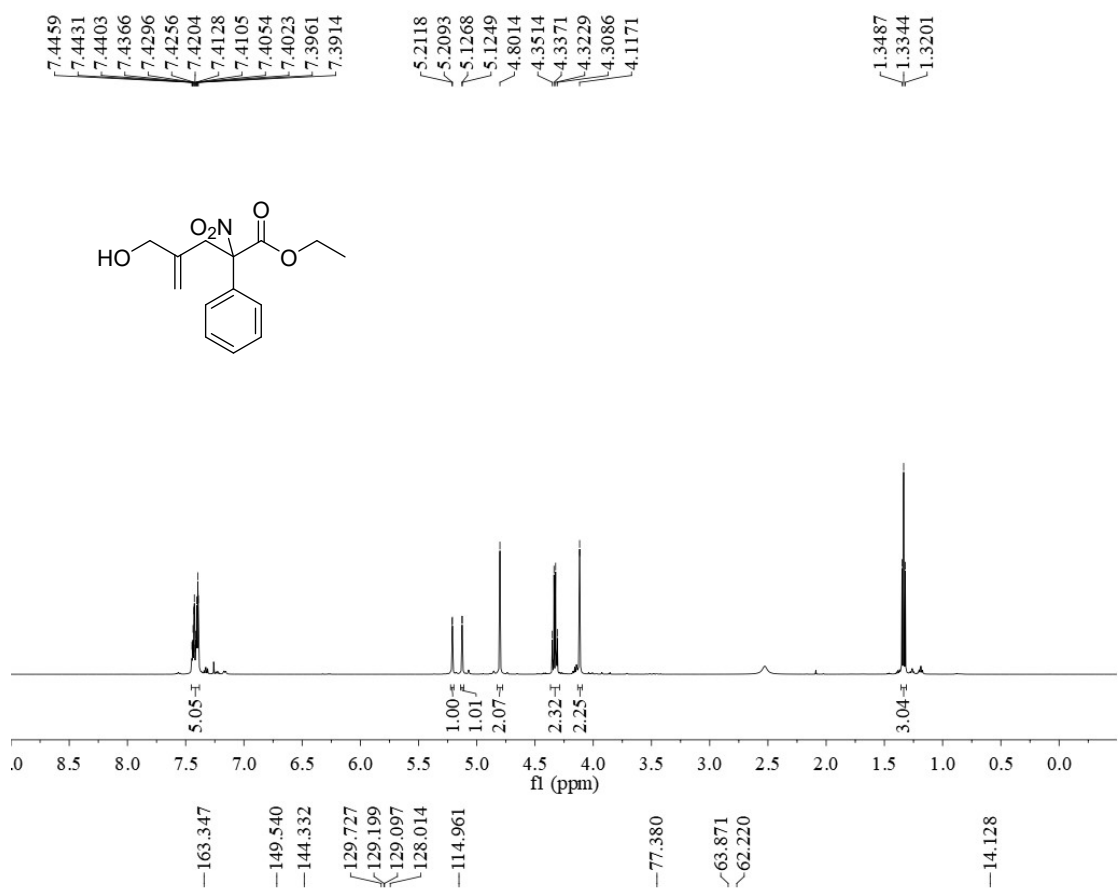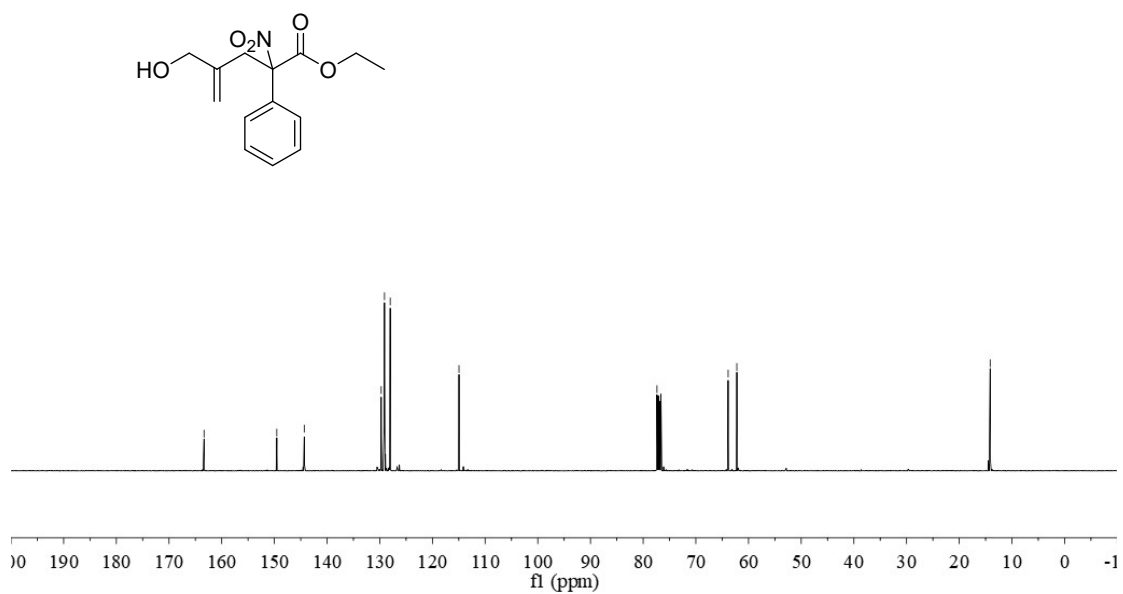

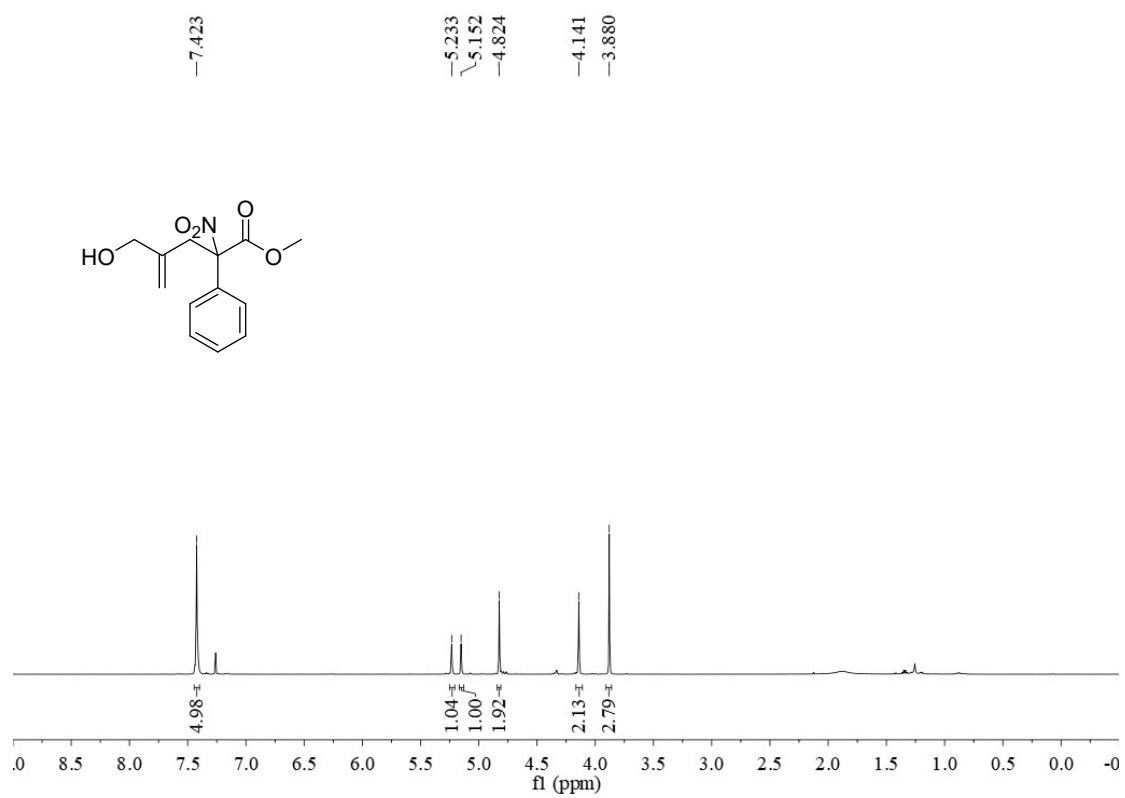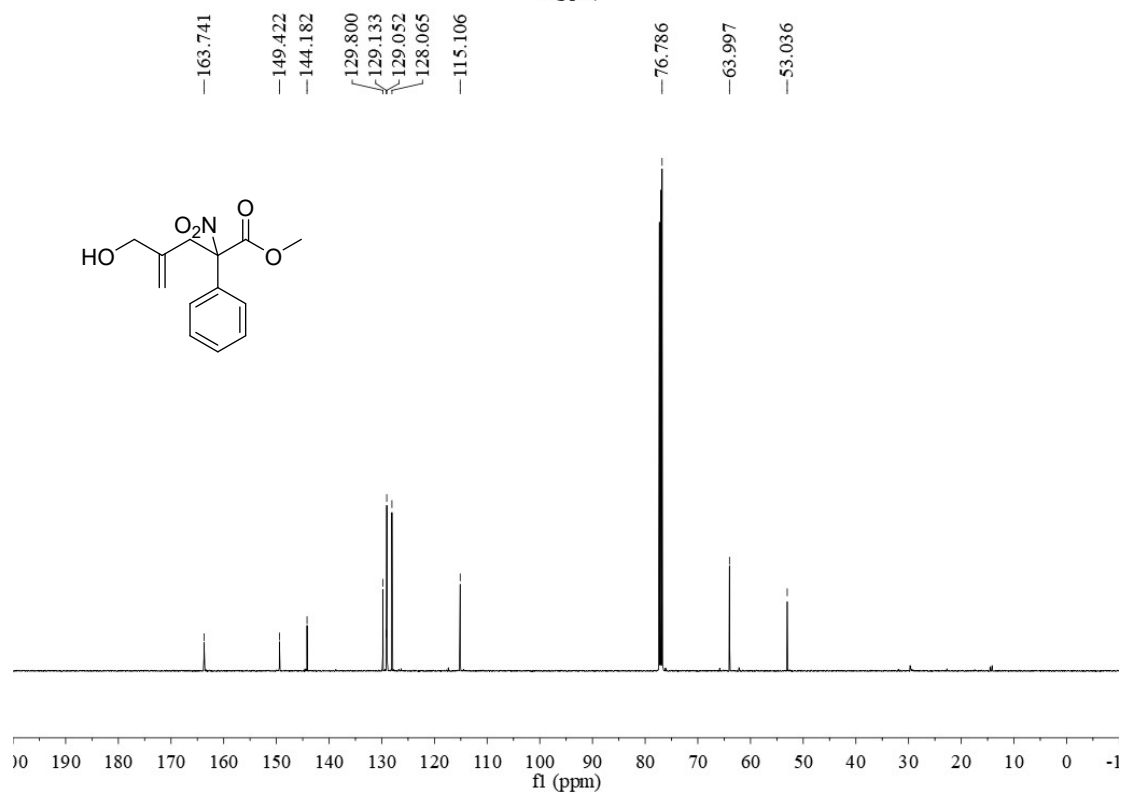

**2aa:**

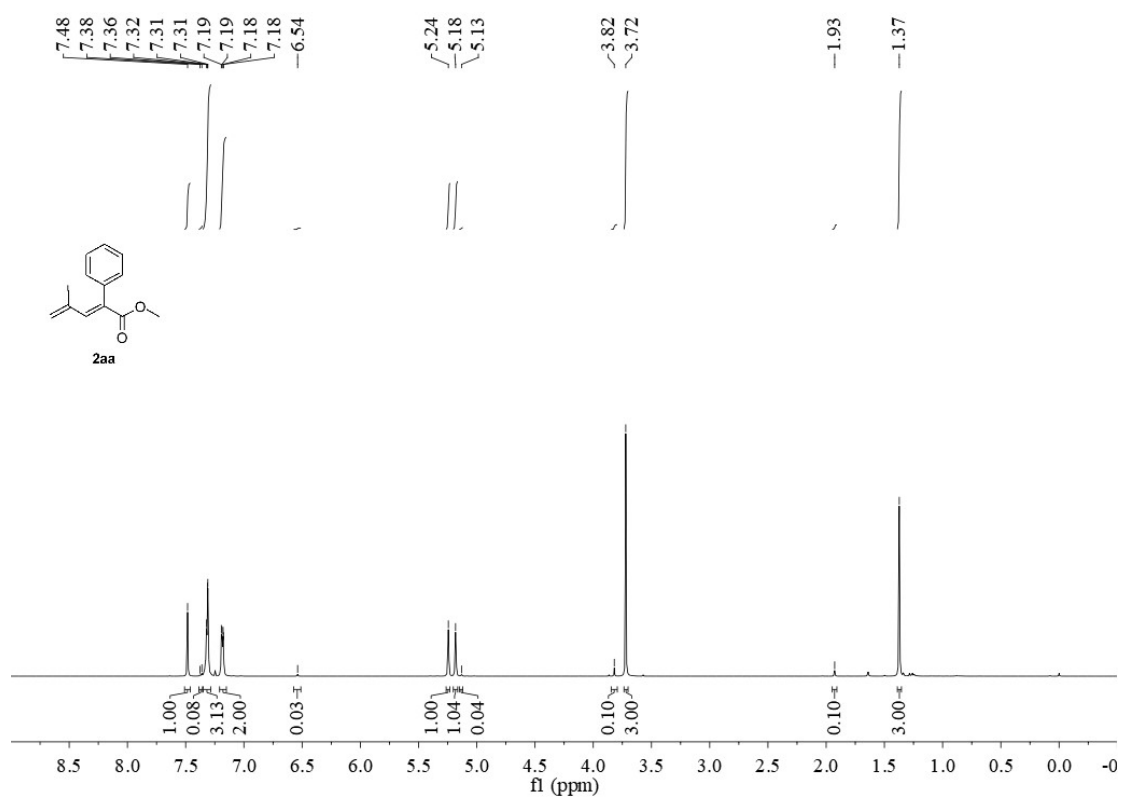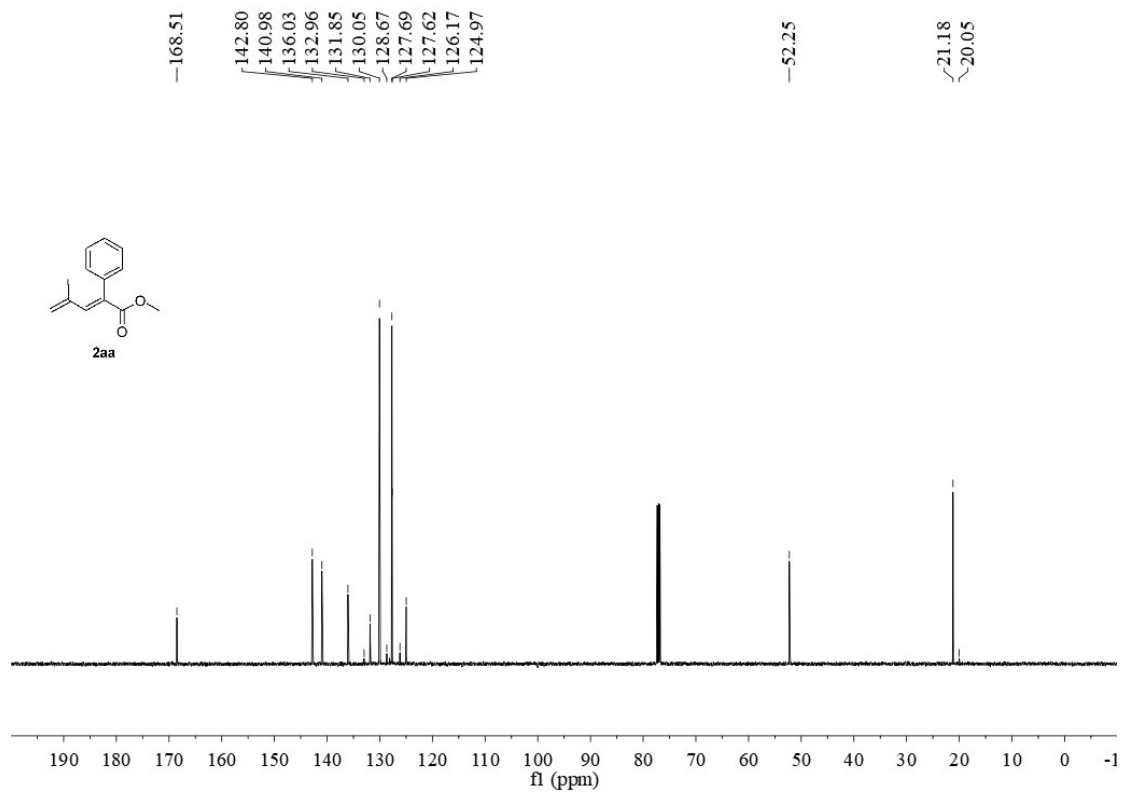

**2ab:**

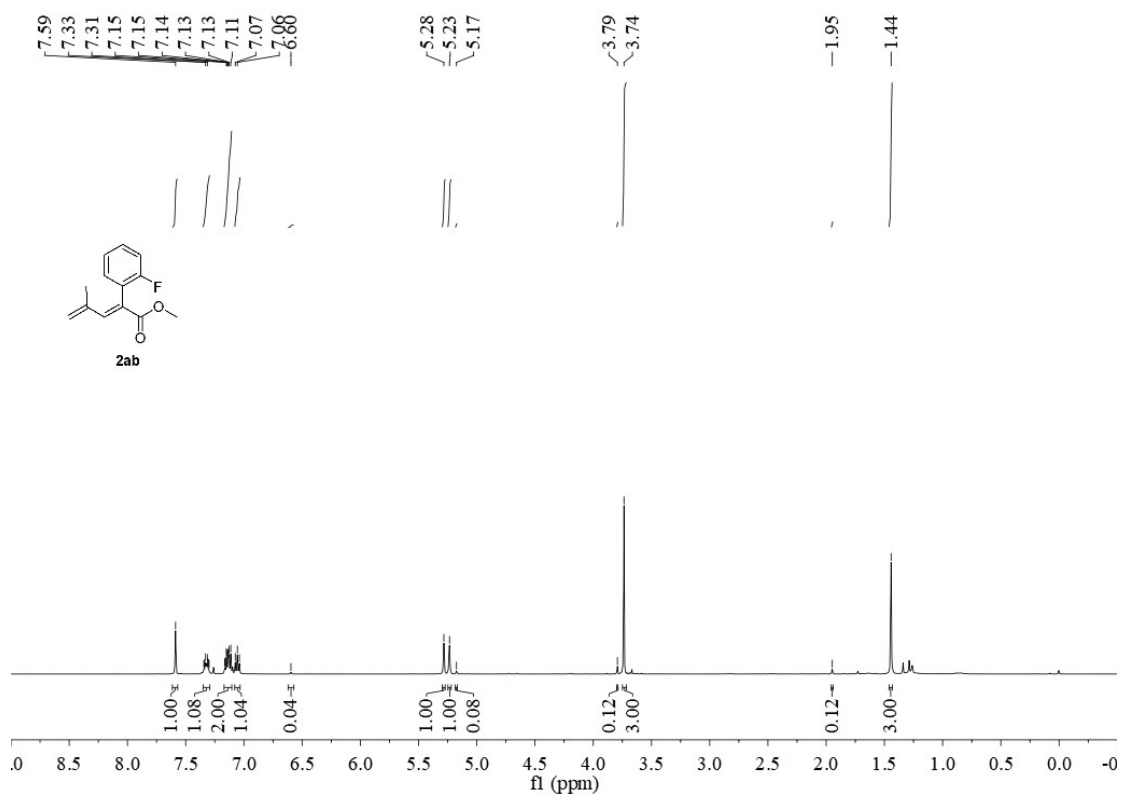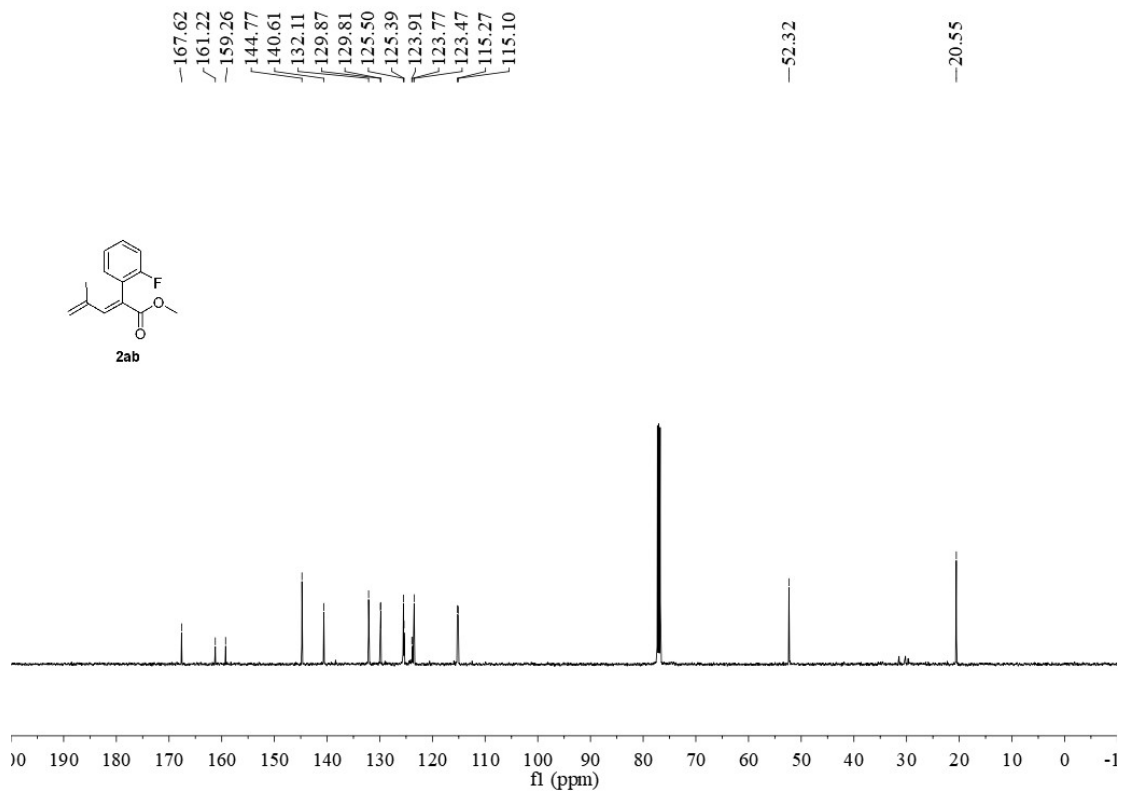

**2ac:**

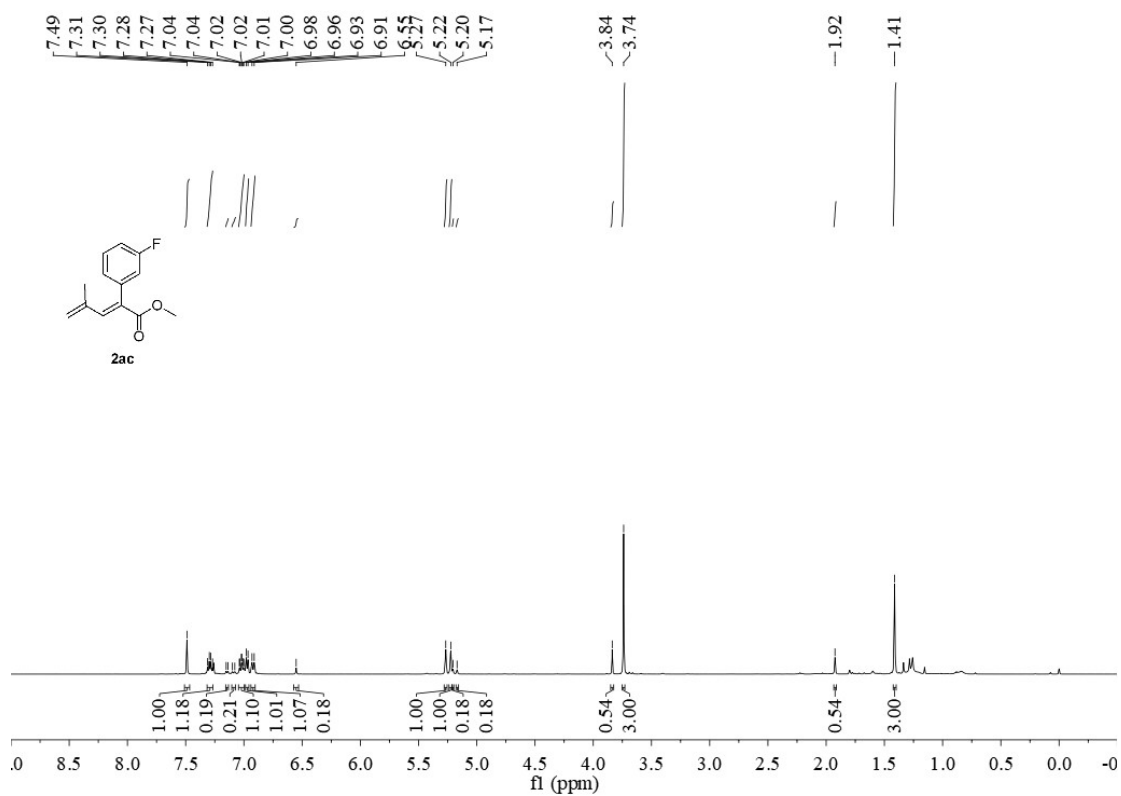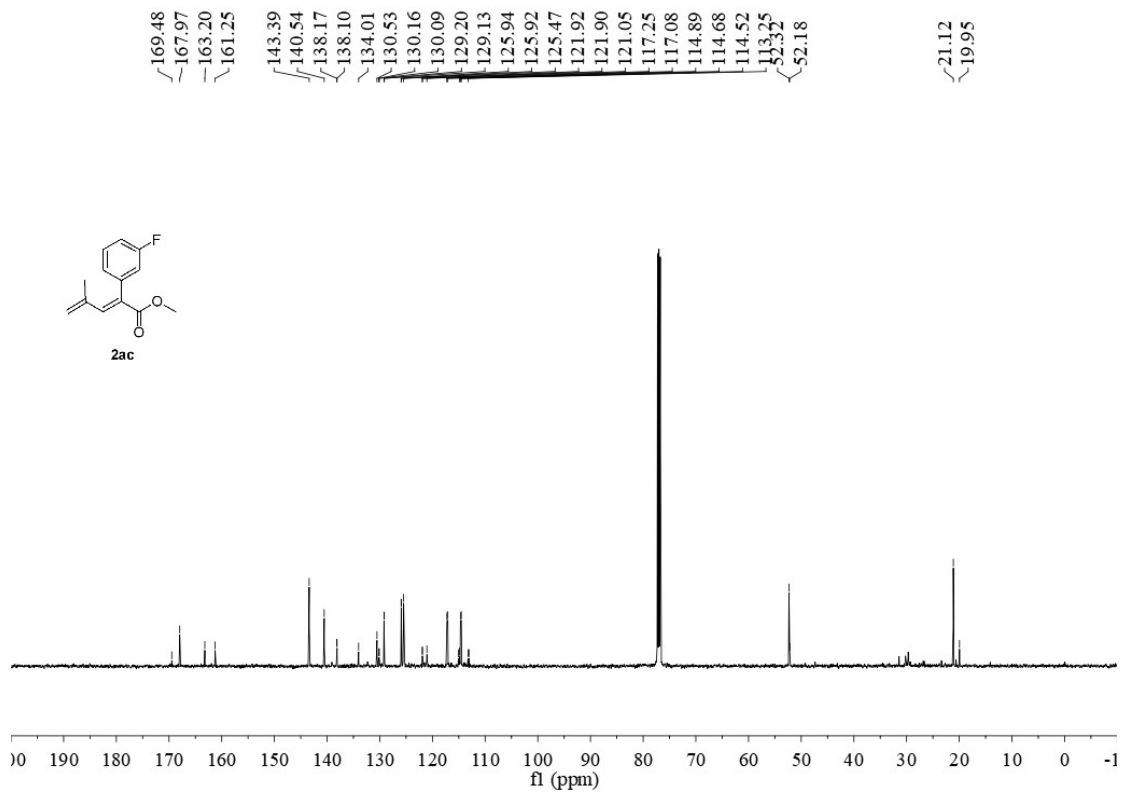

**2ad:**

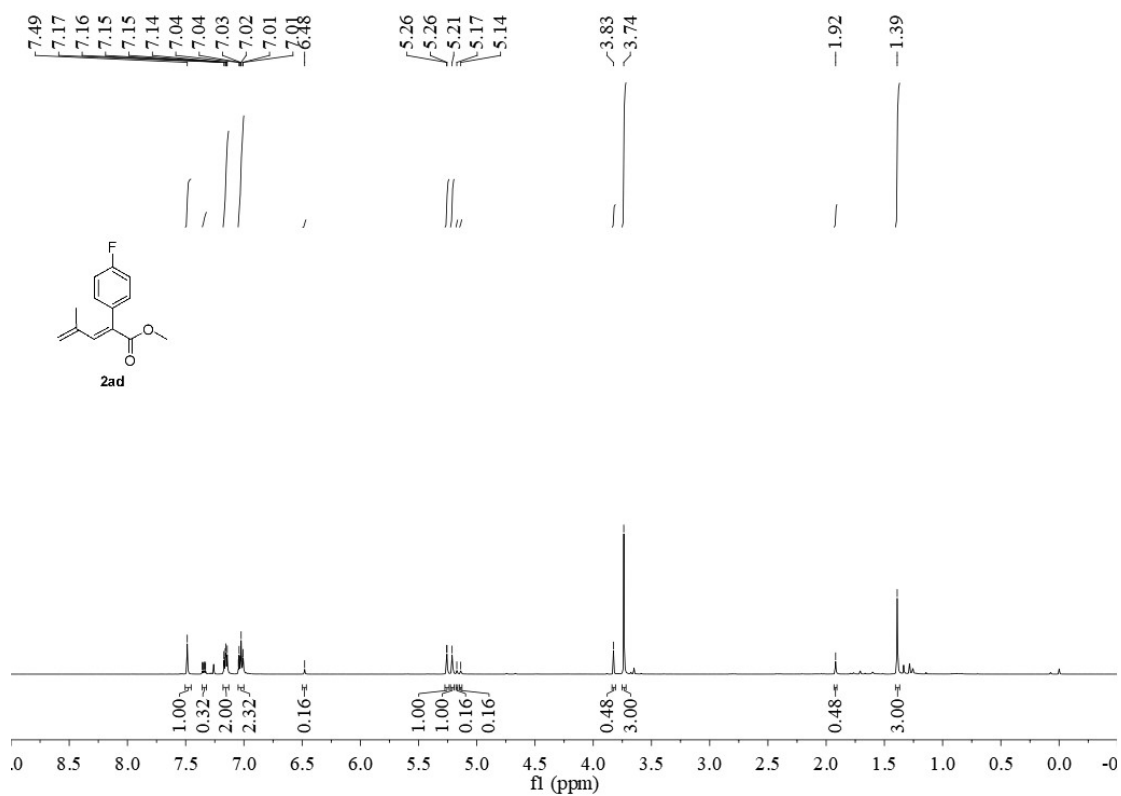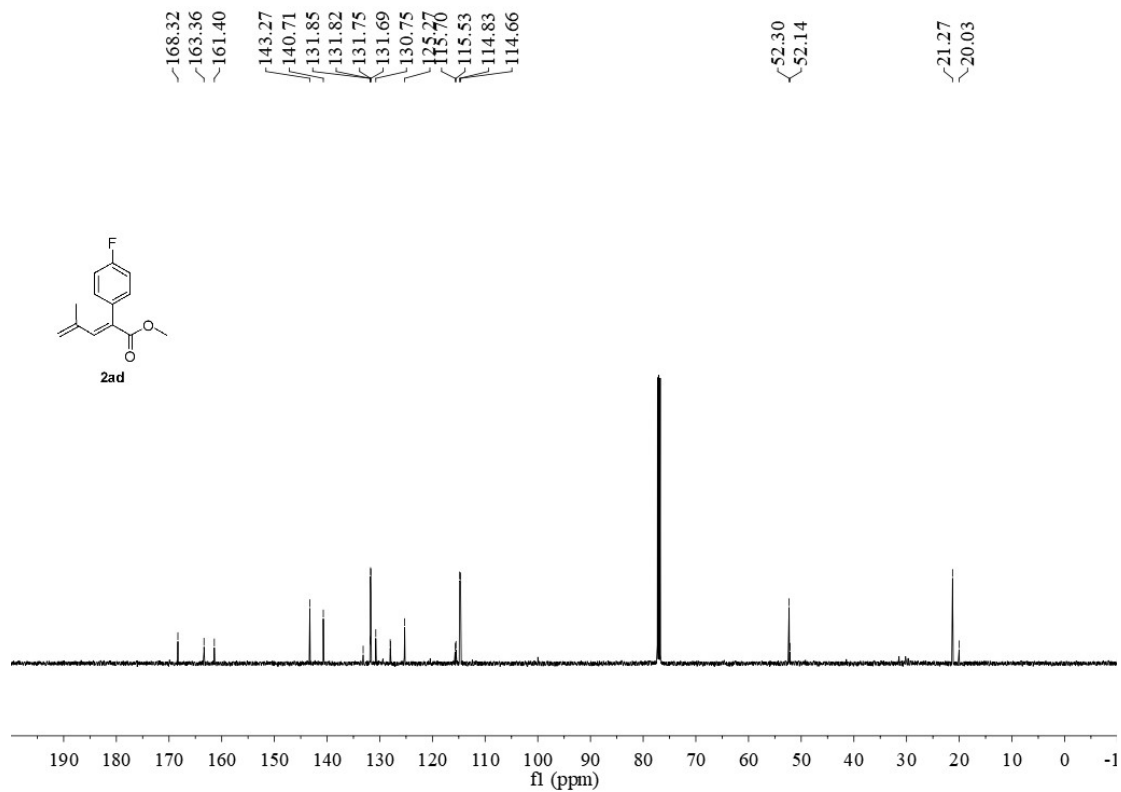

**2ae:**

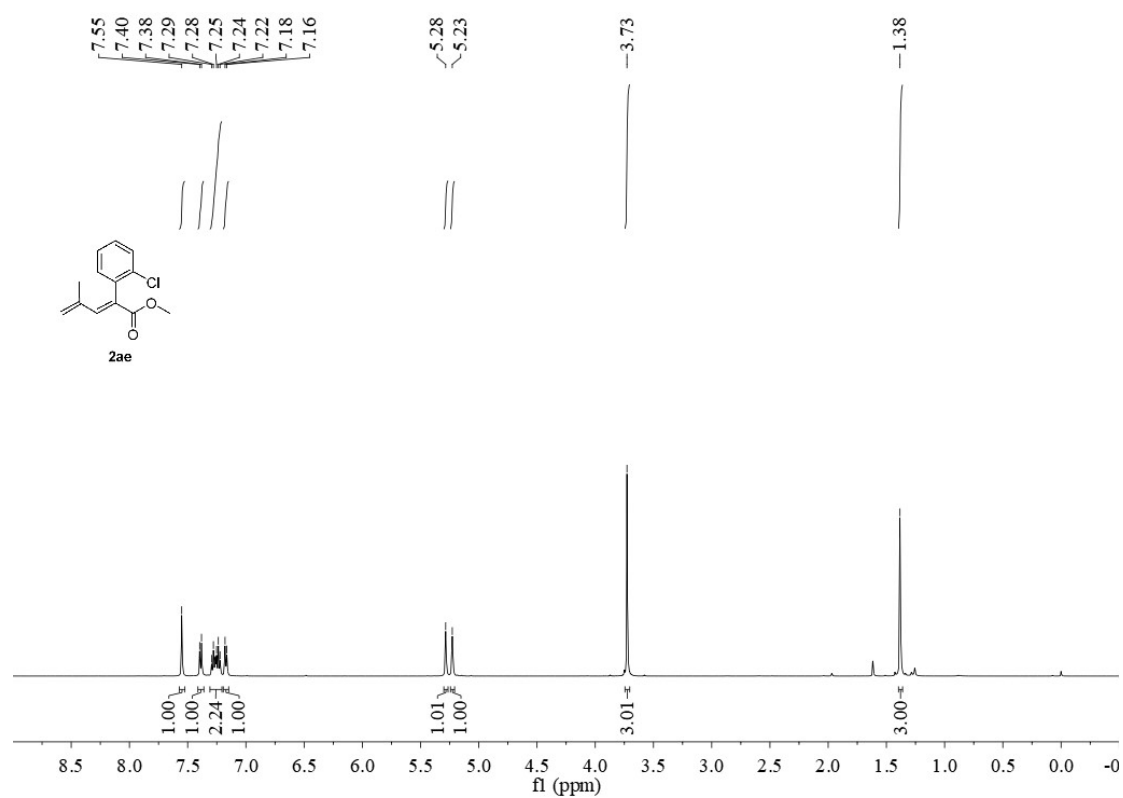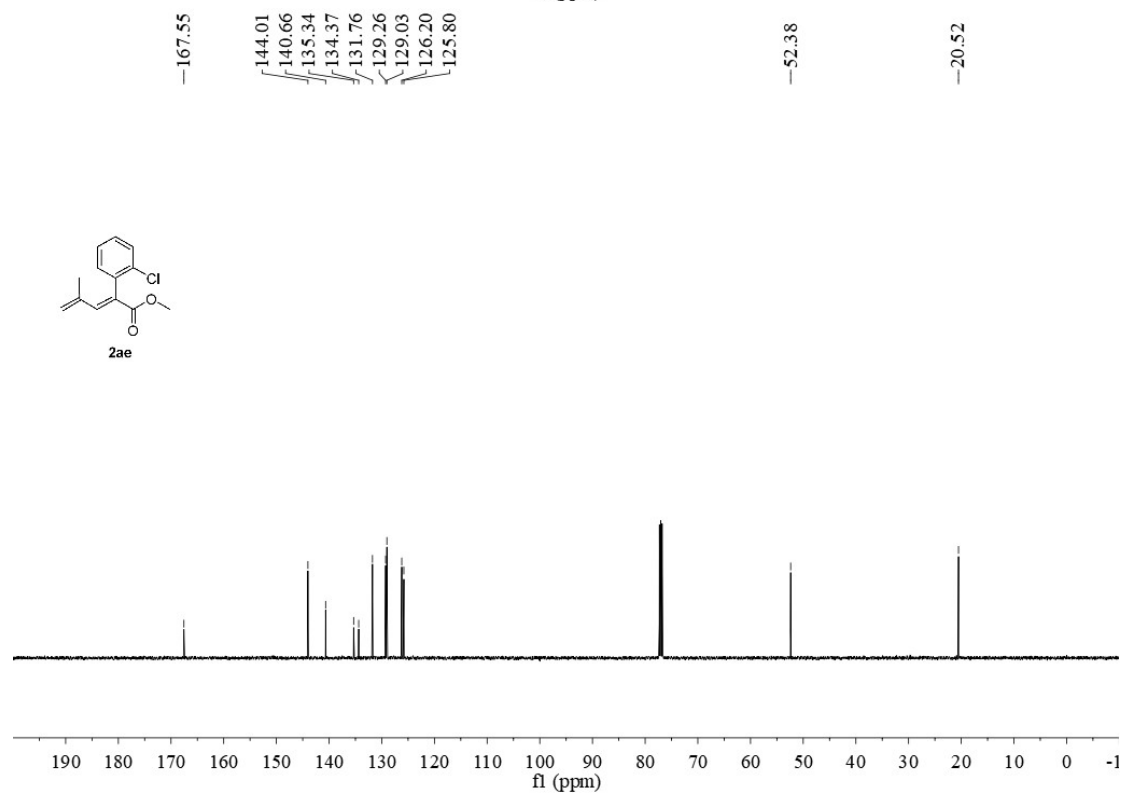

**2af:**

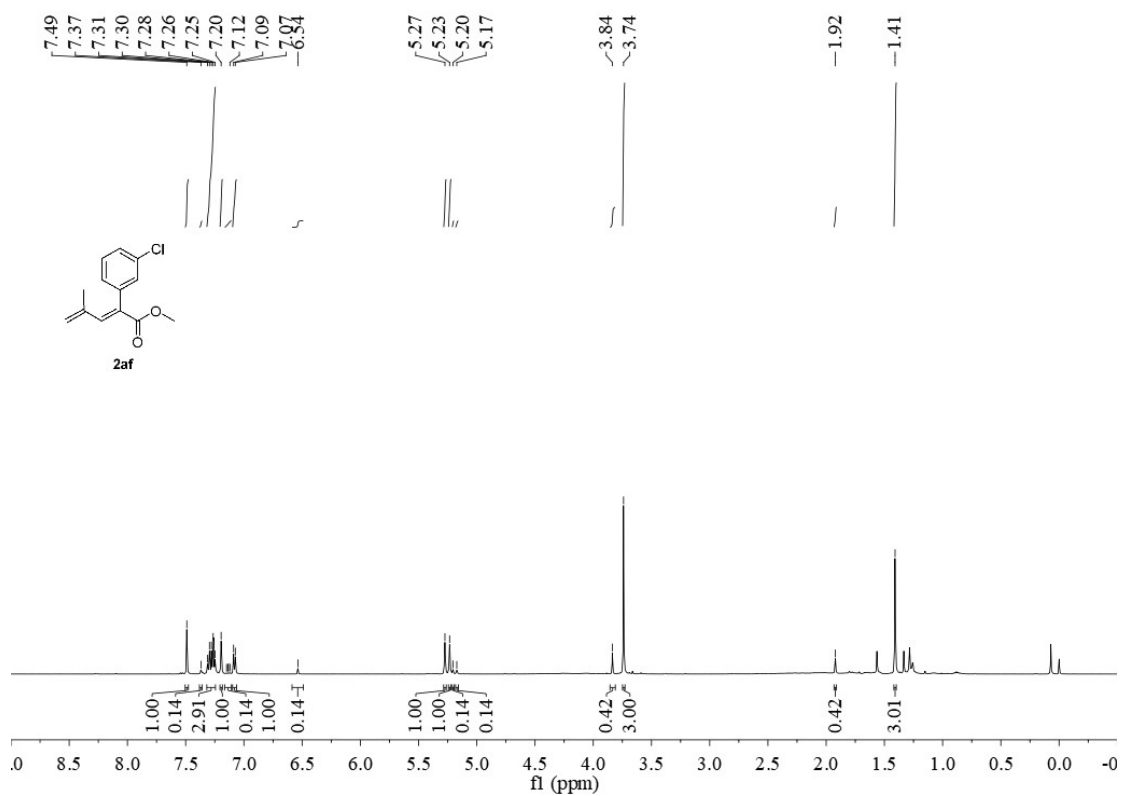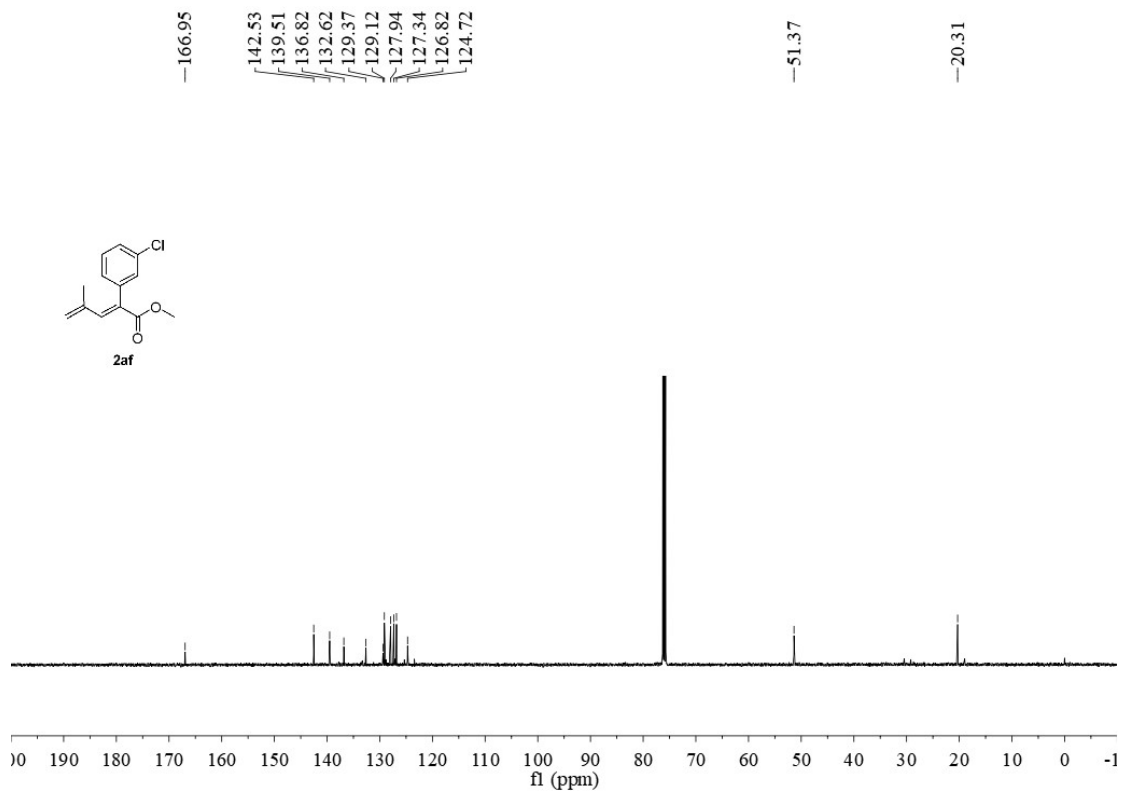

**2ag:**

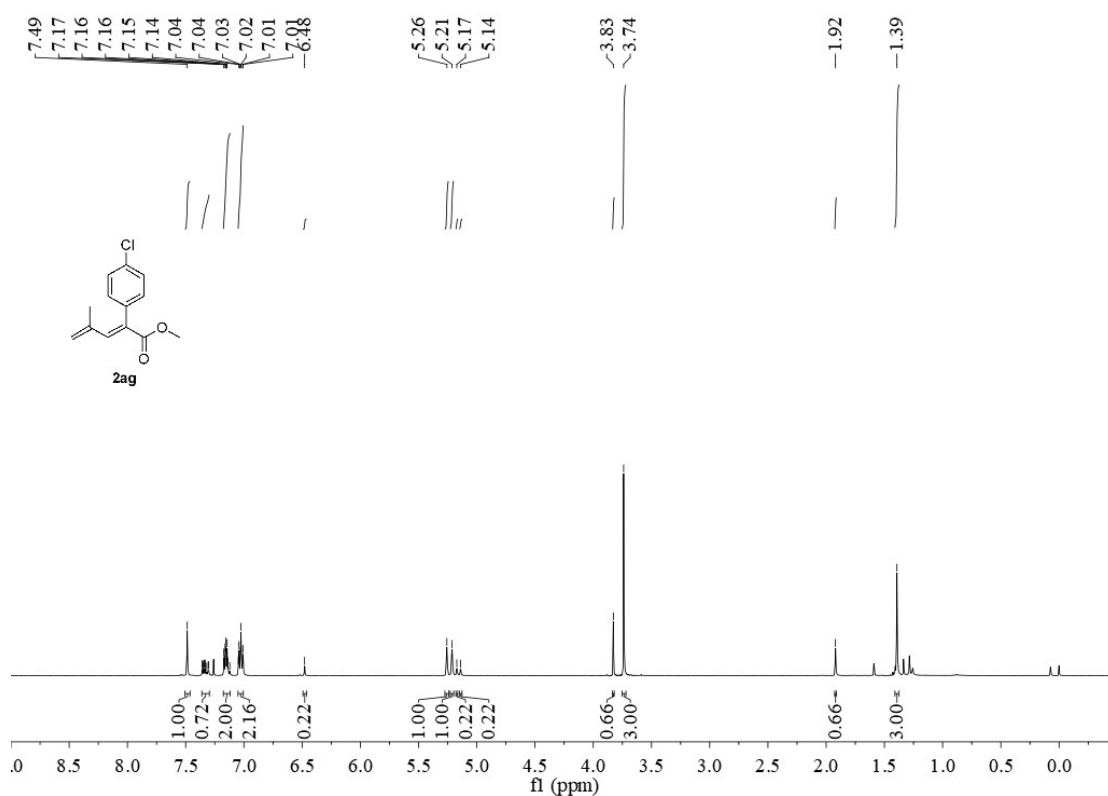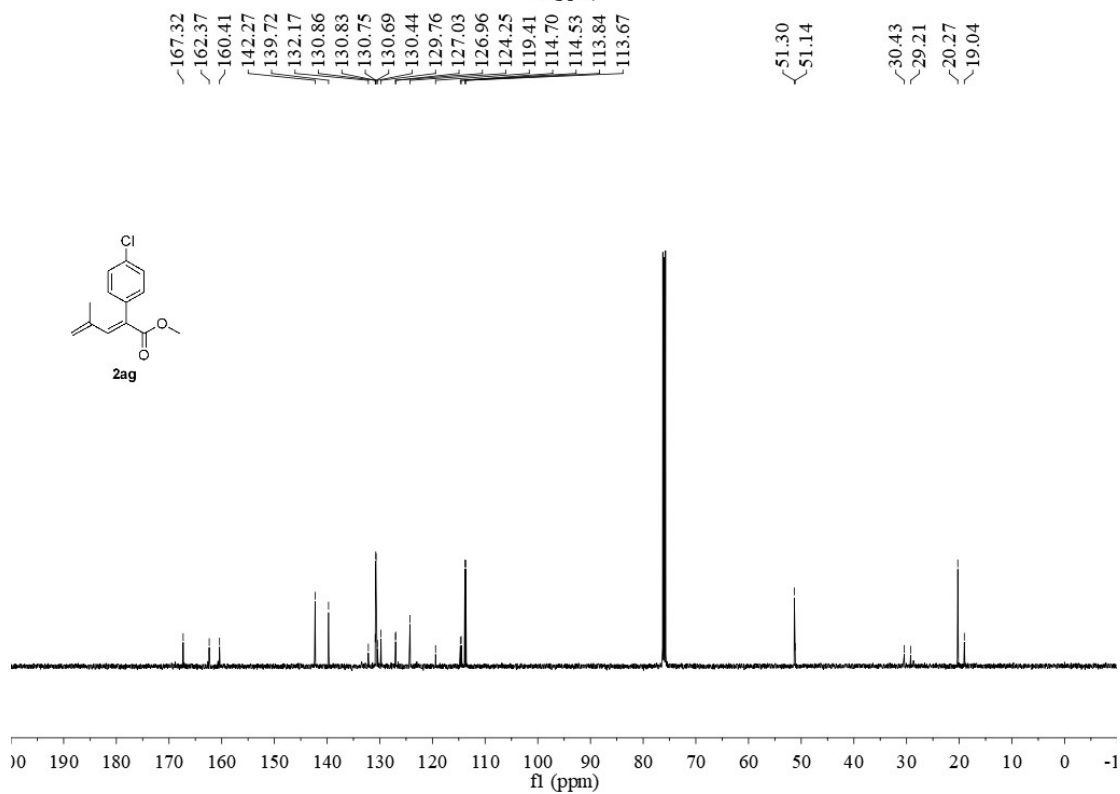

**2ah:**

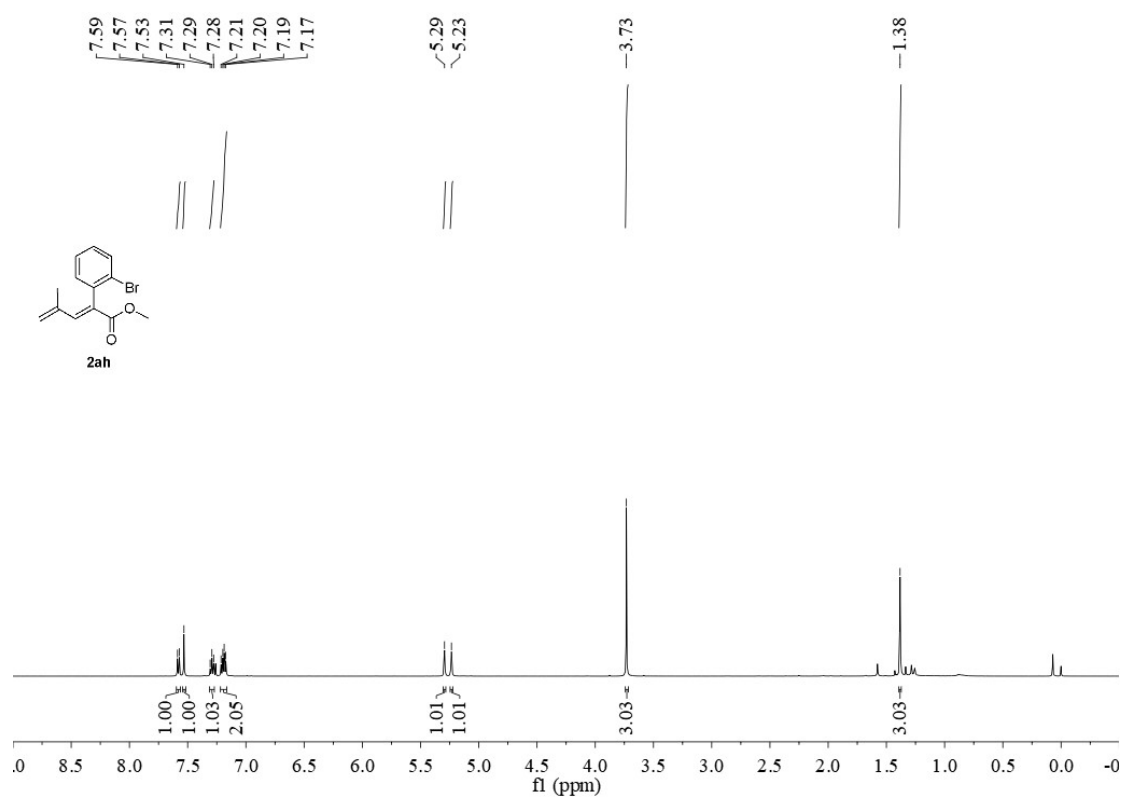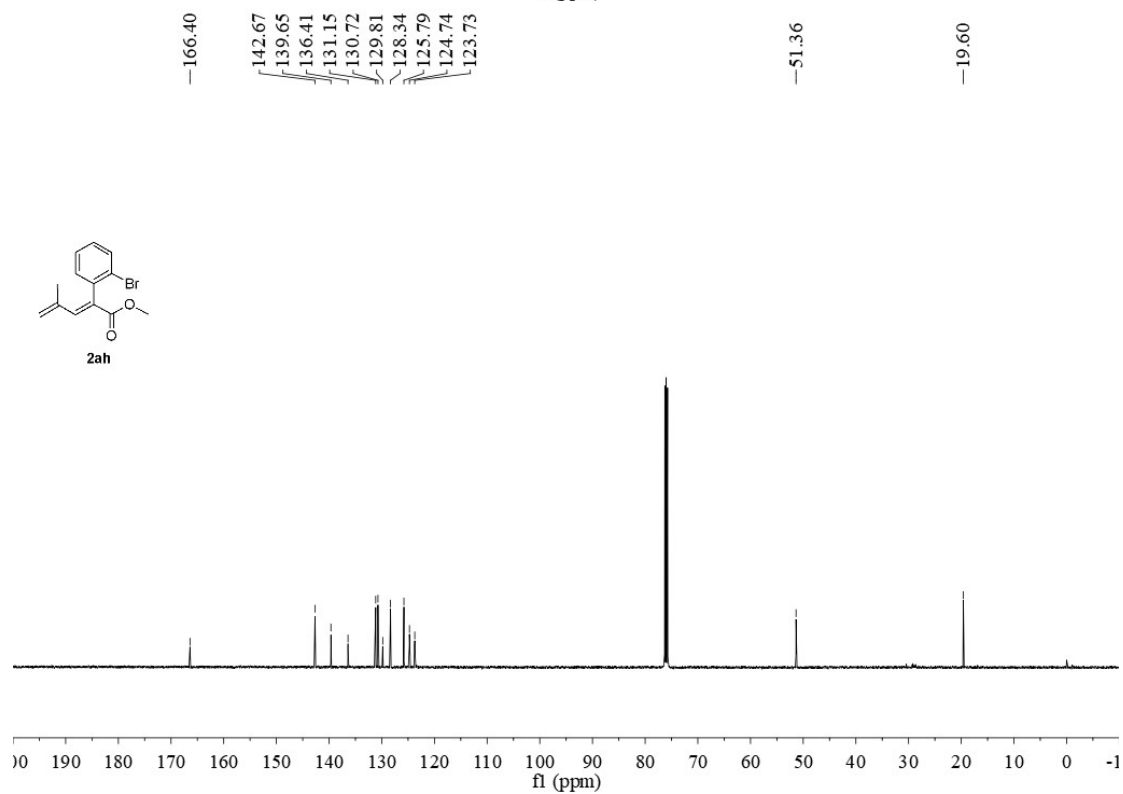

**2ai:**

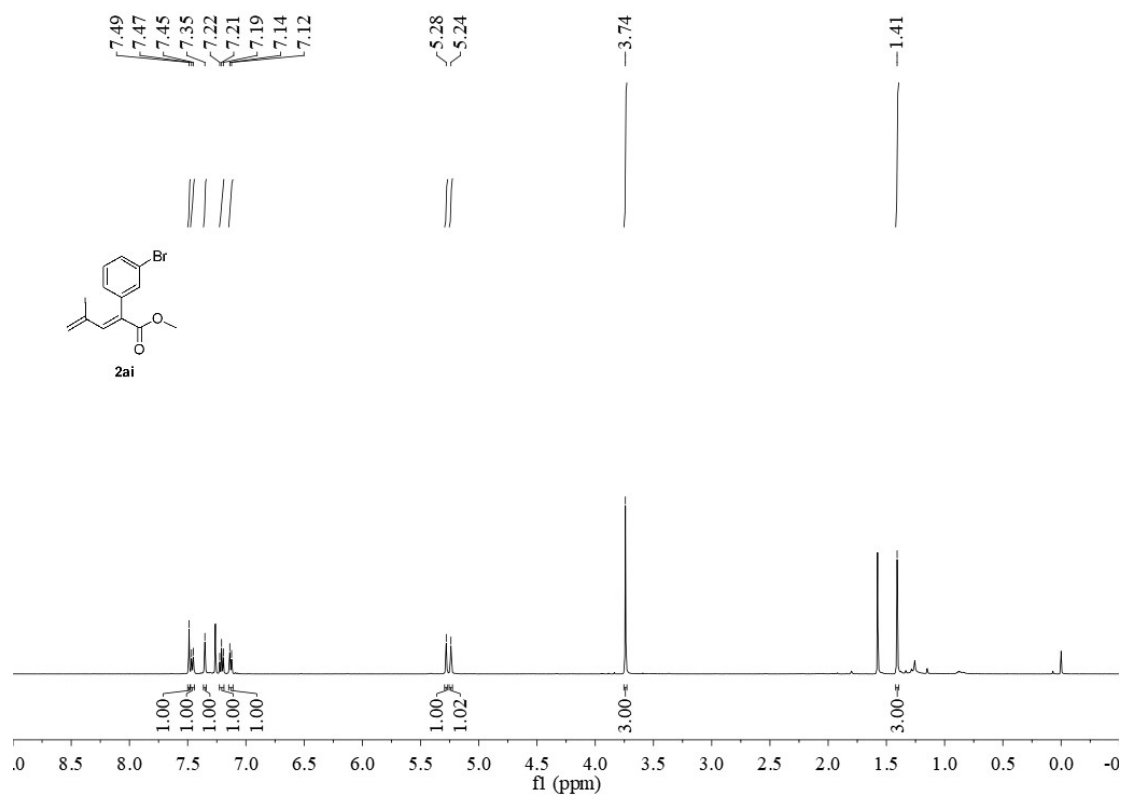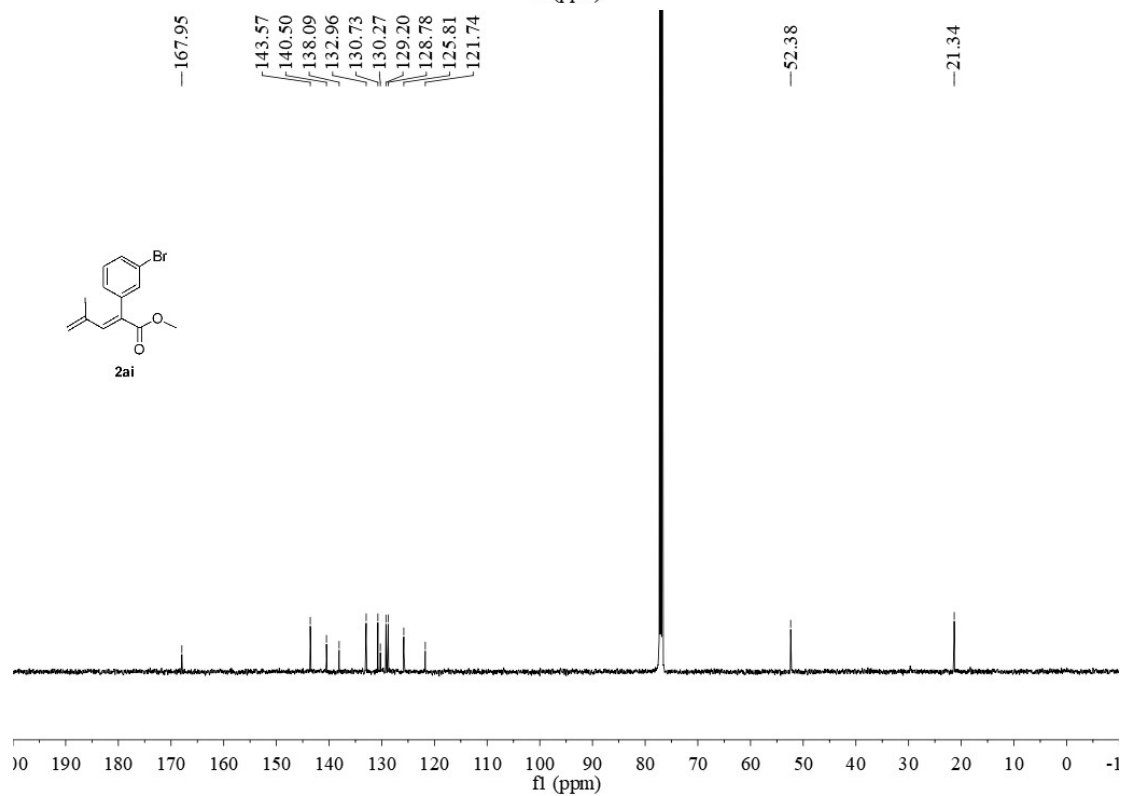

**2aj:**

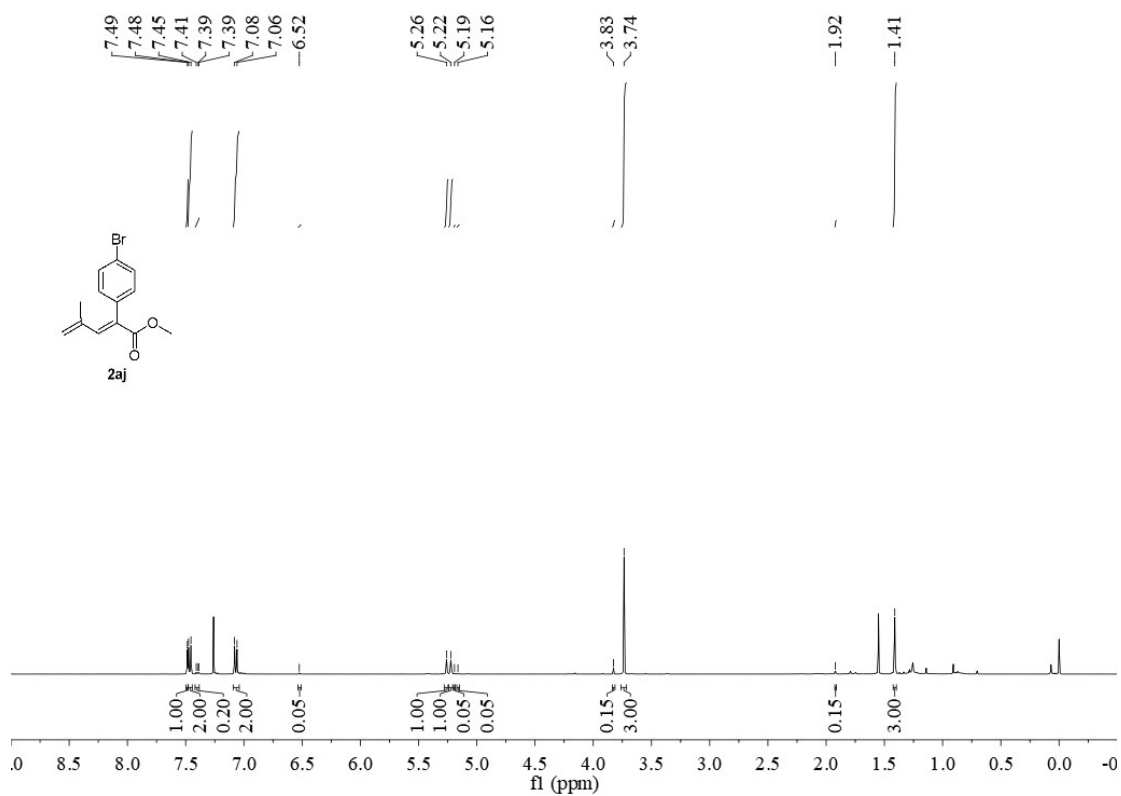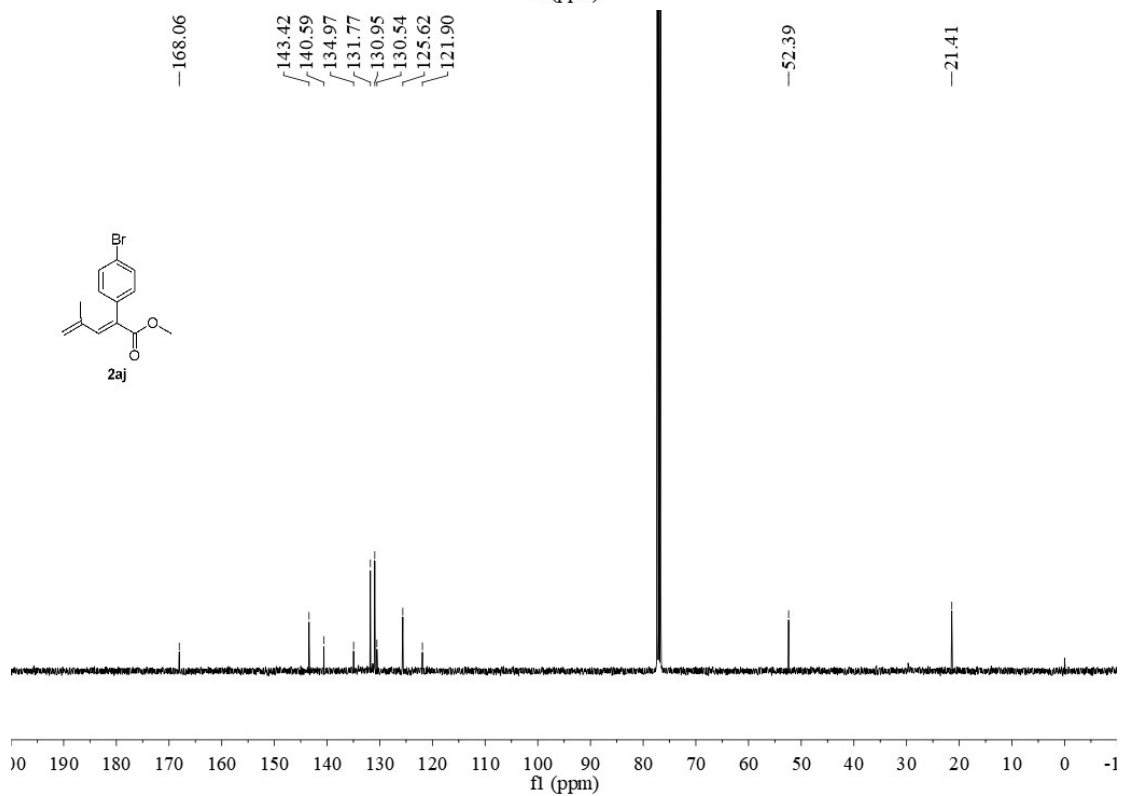

**2ak:**

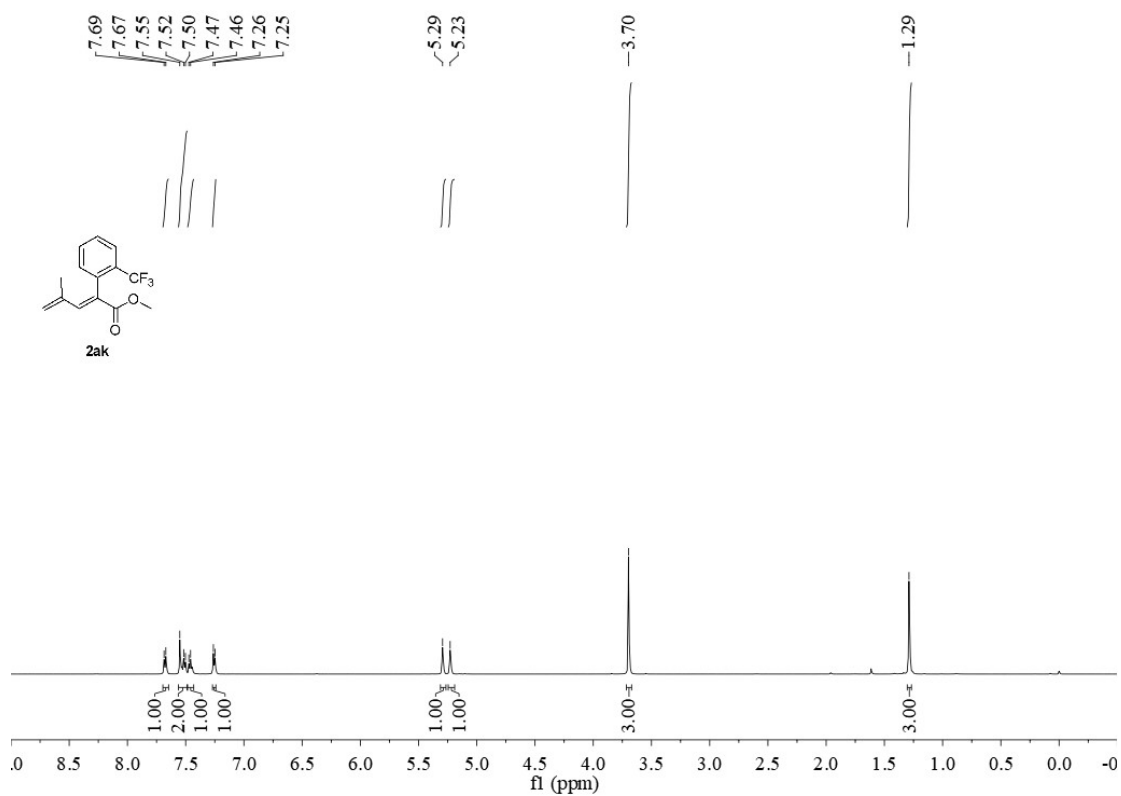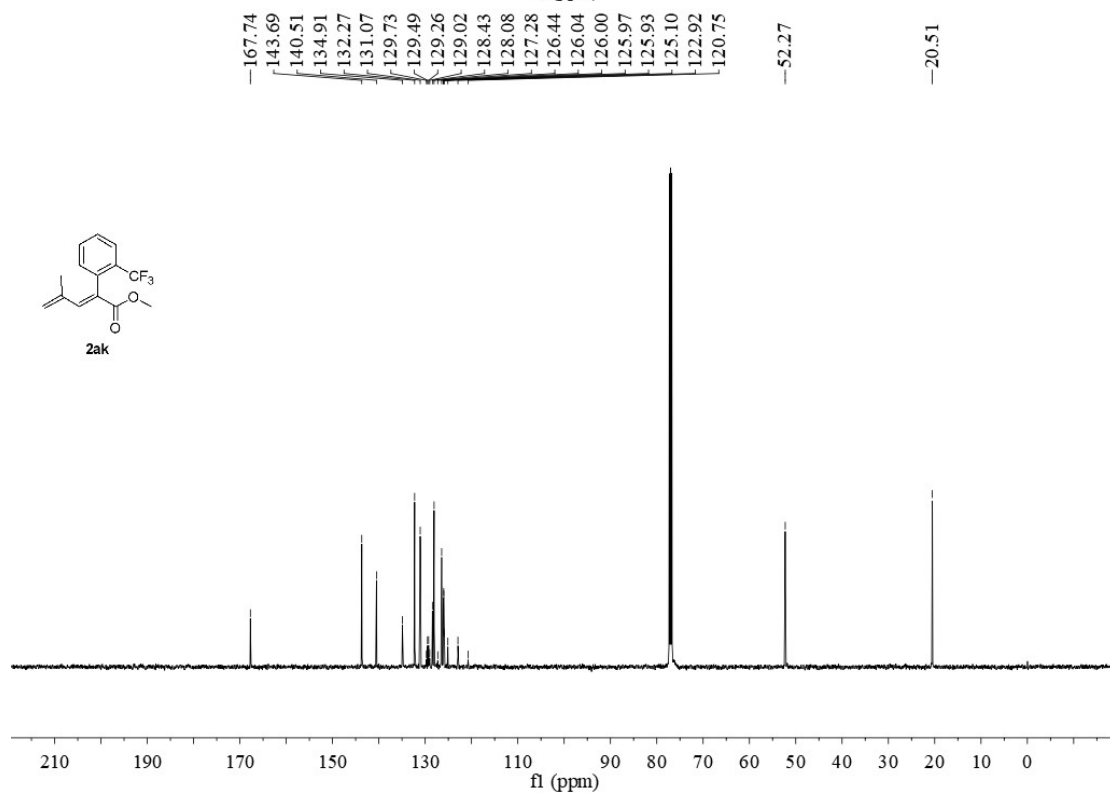

**2al:**

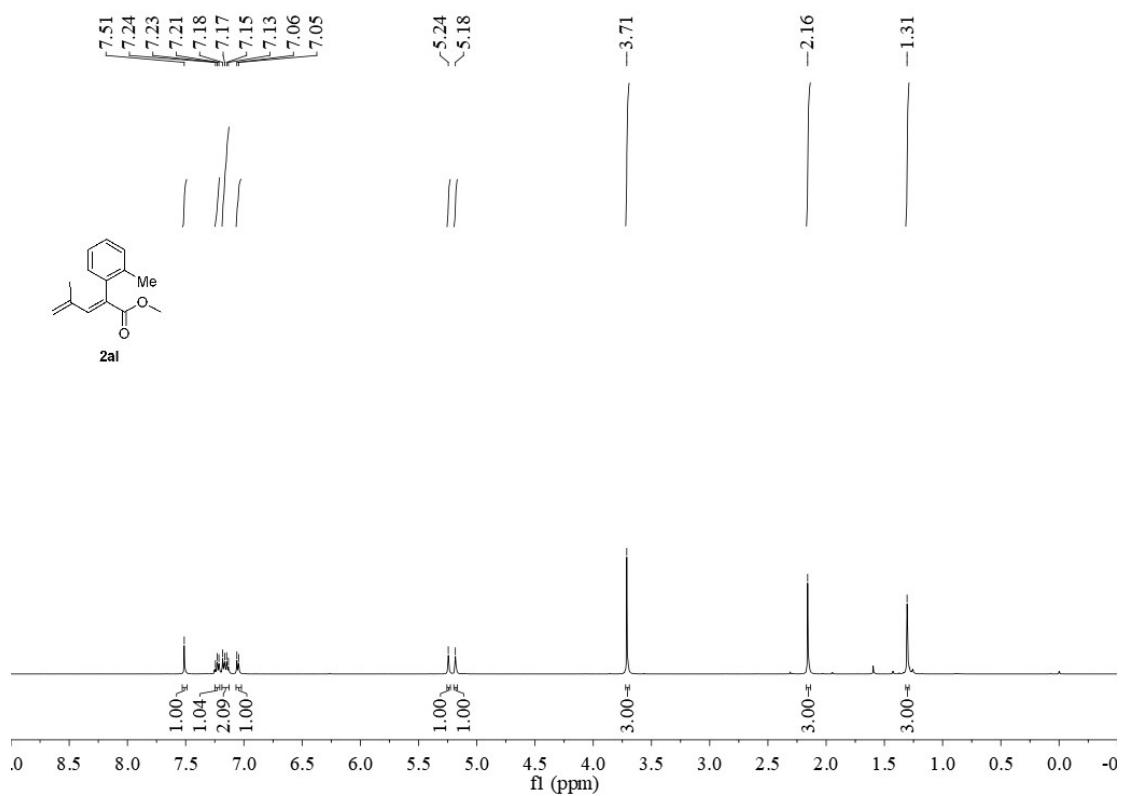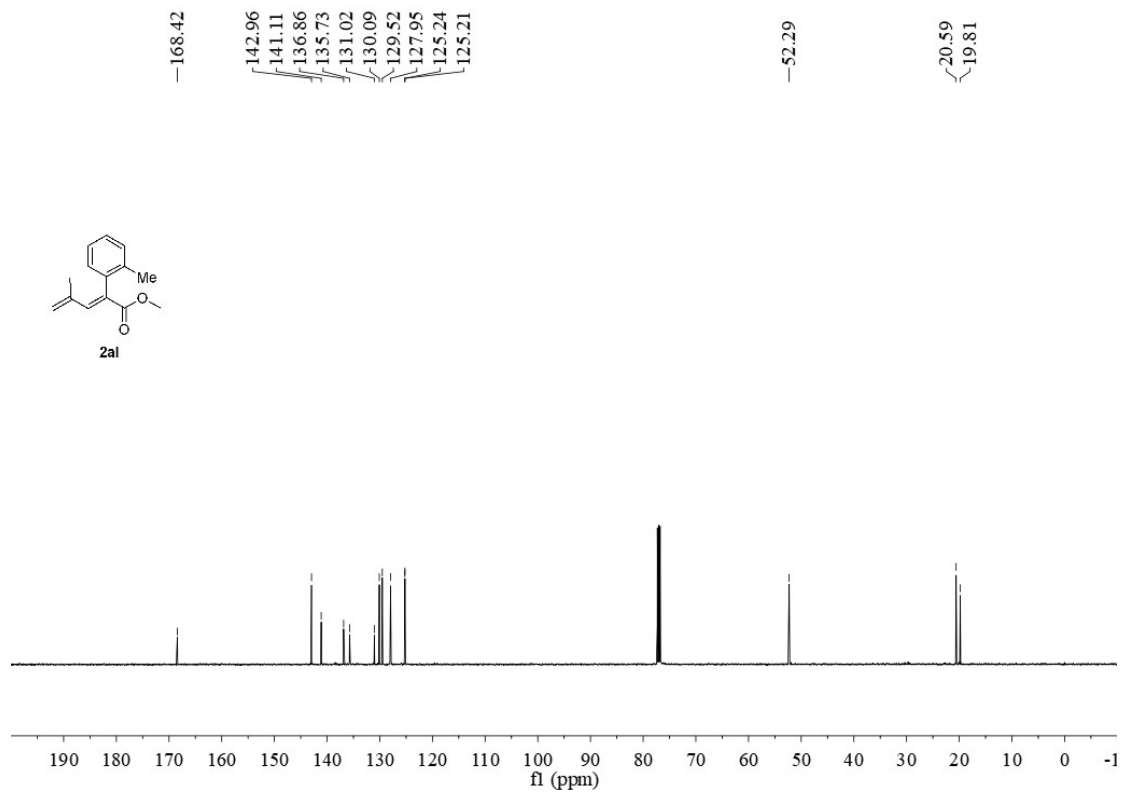

**2am:**

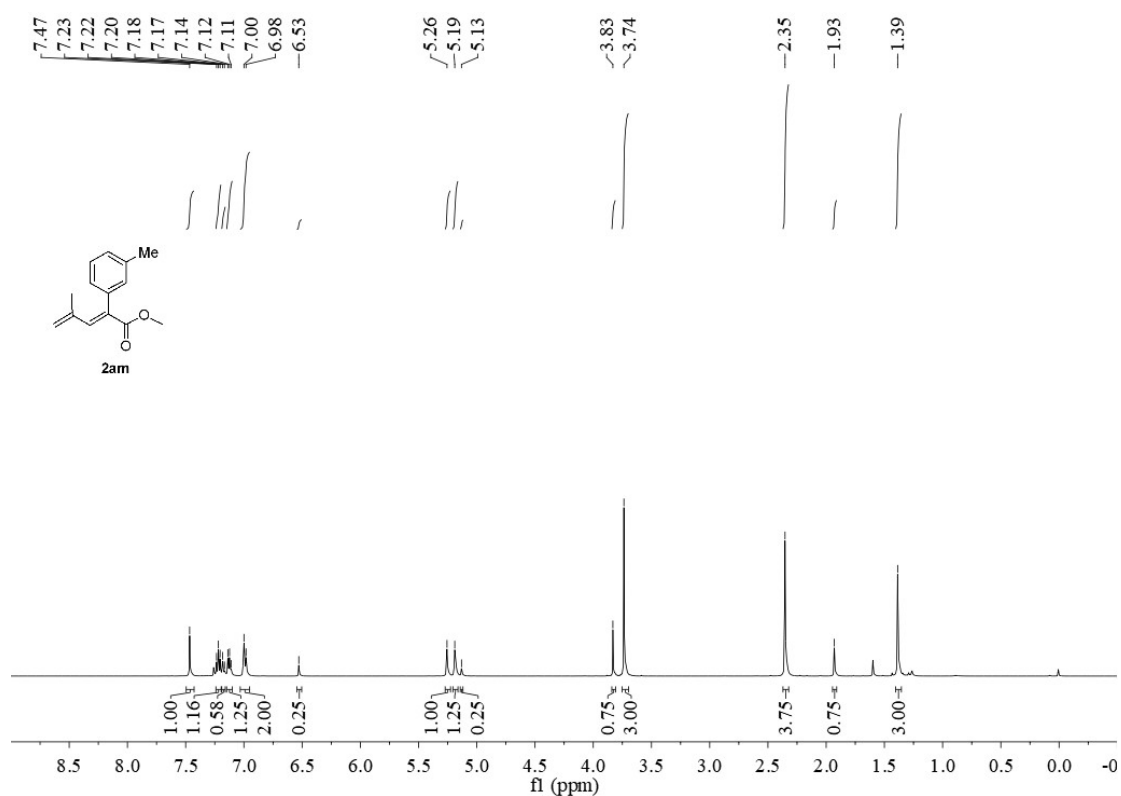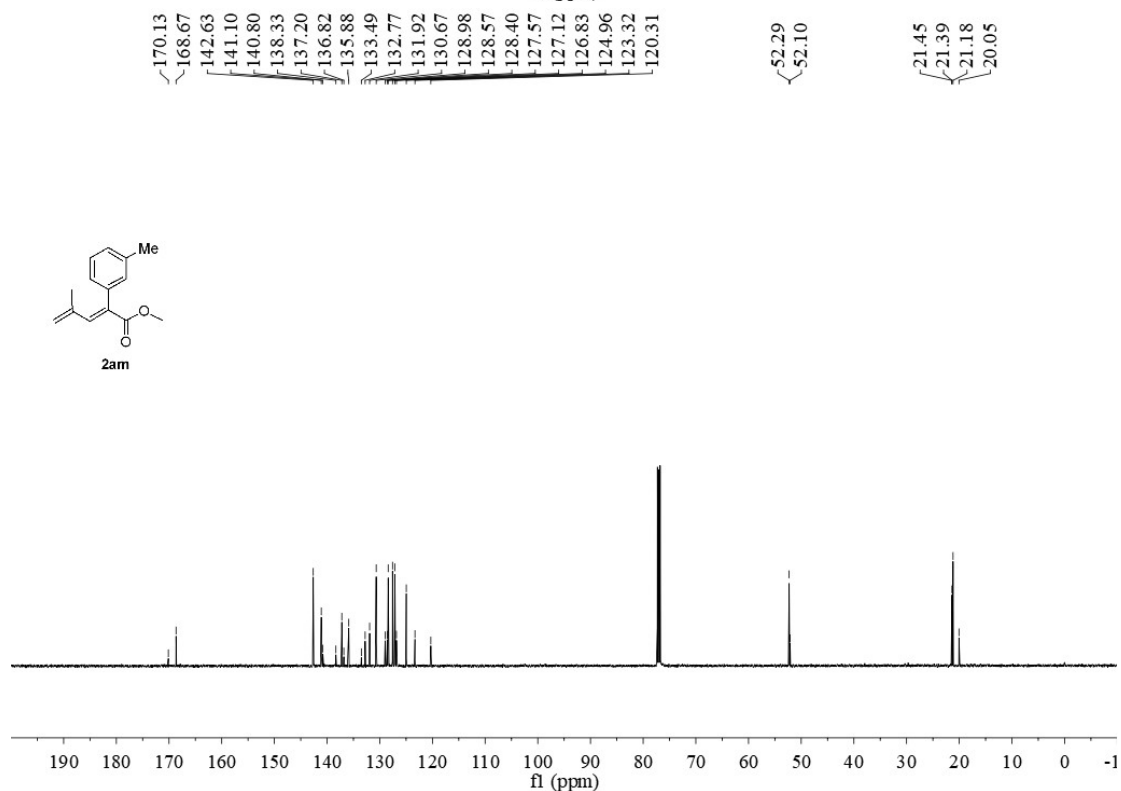

**2an:**

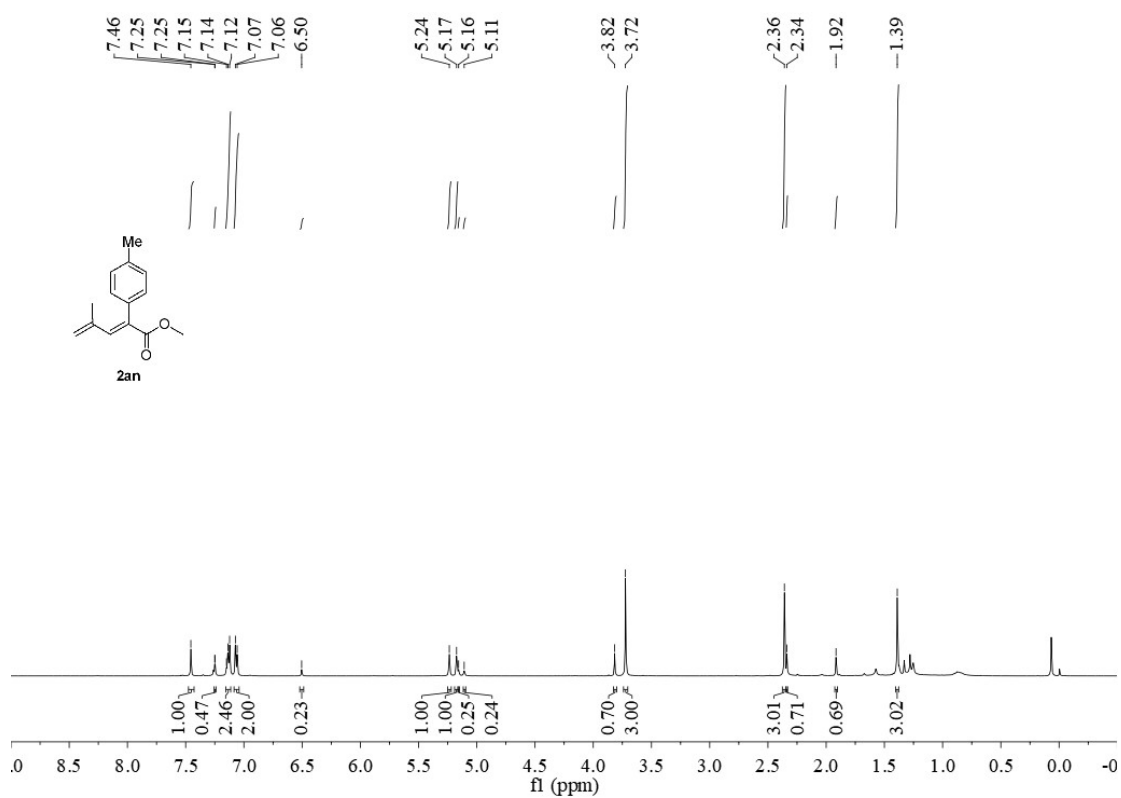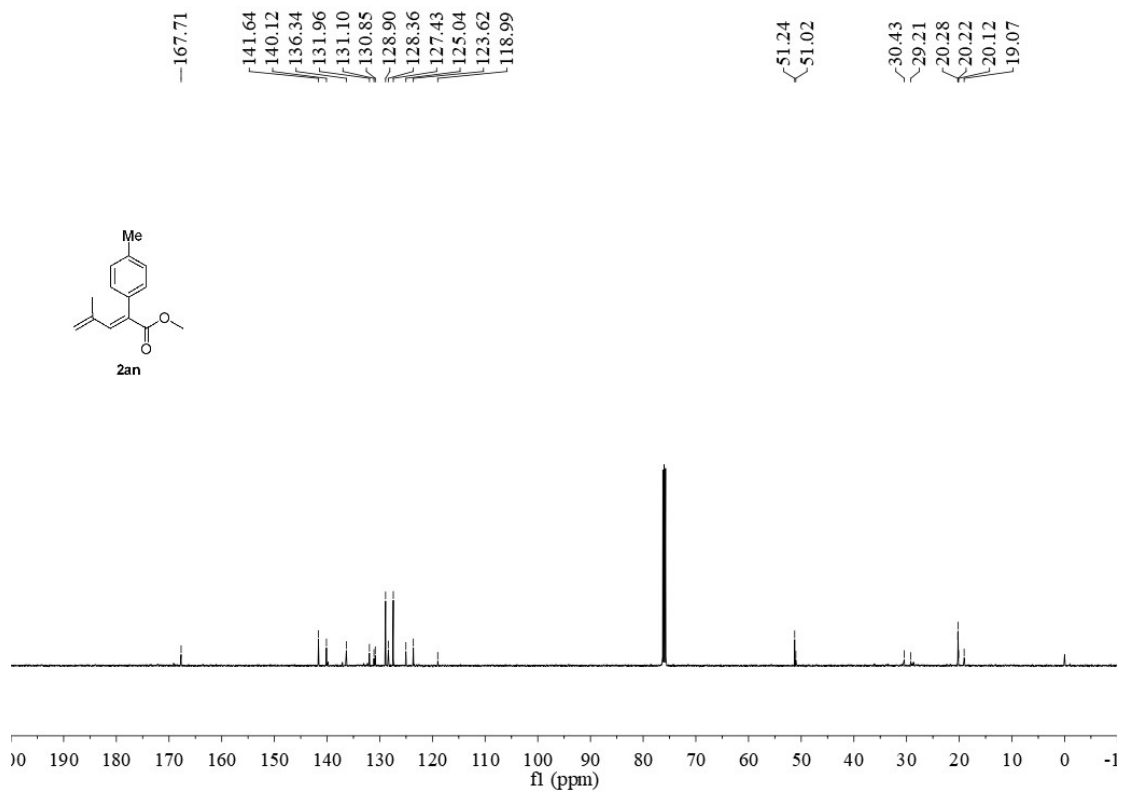

**2ao:**

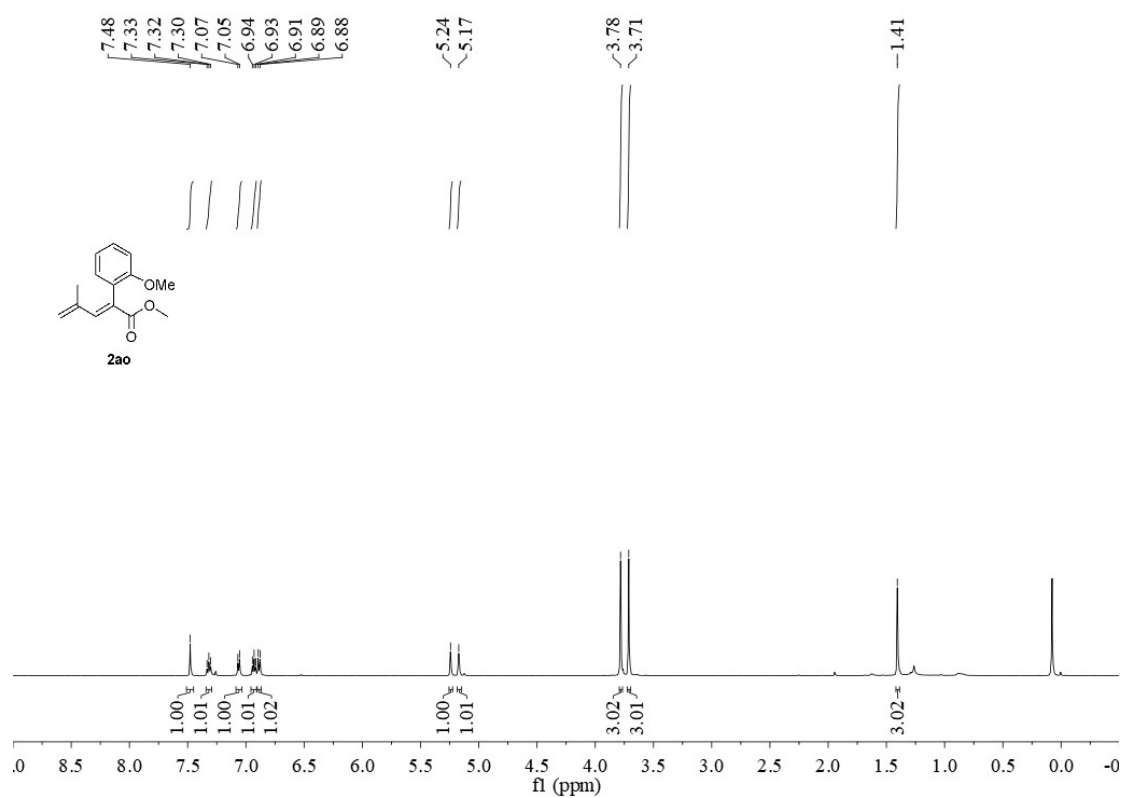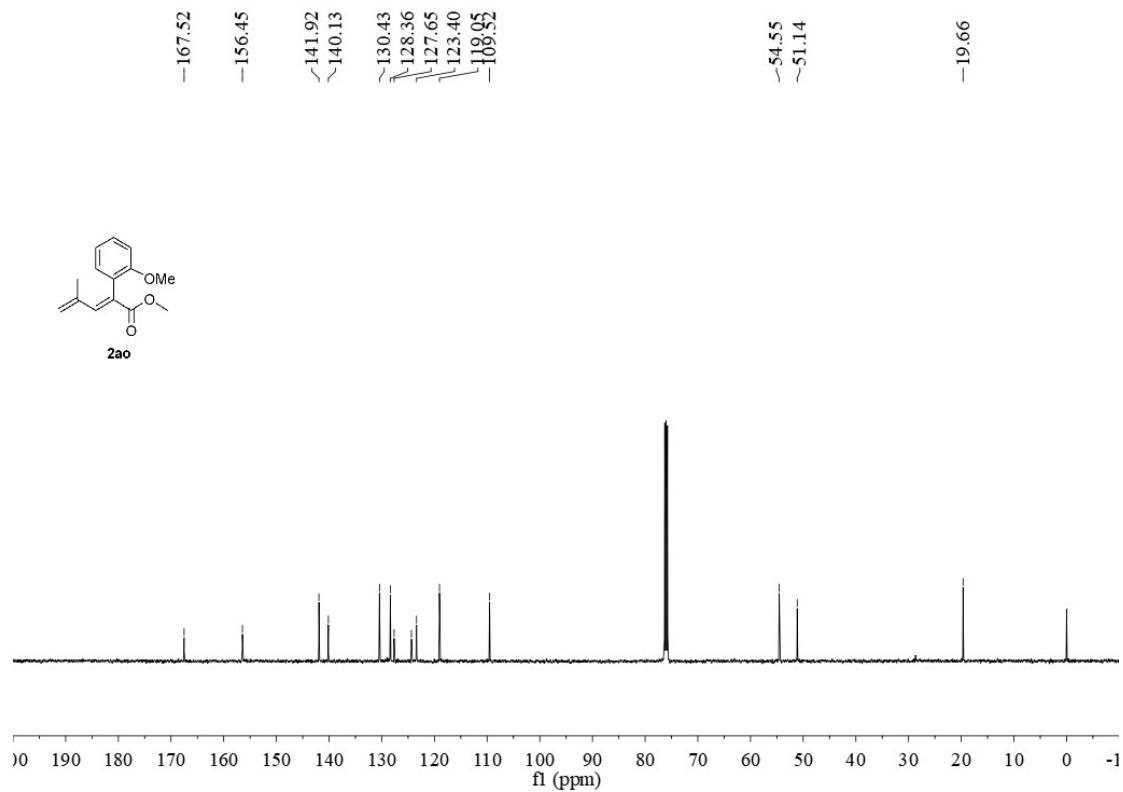

**2ap:**

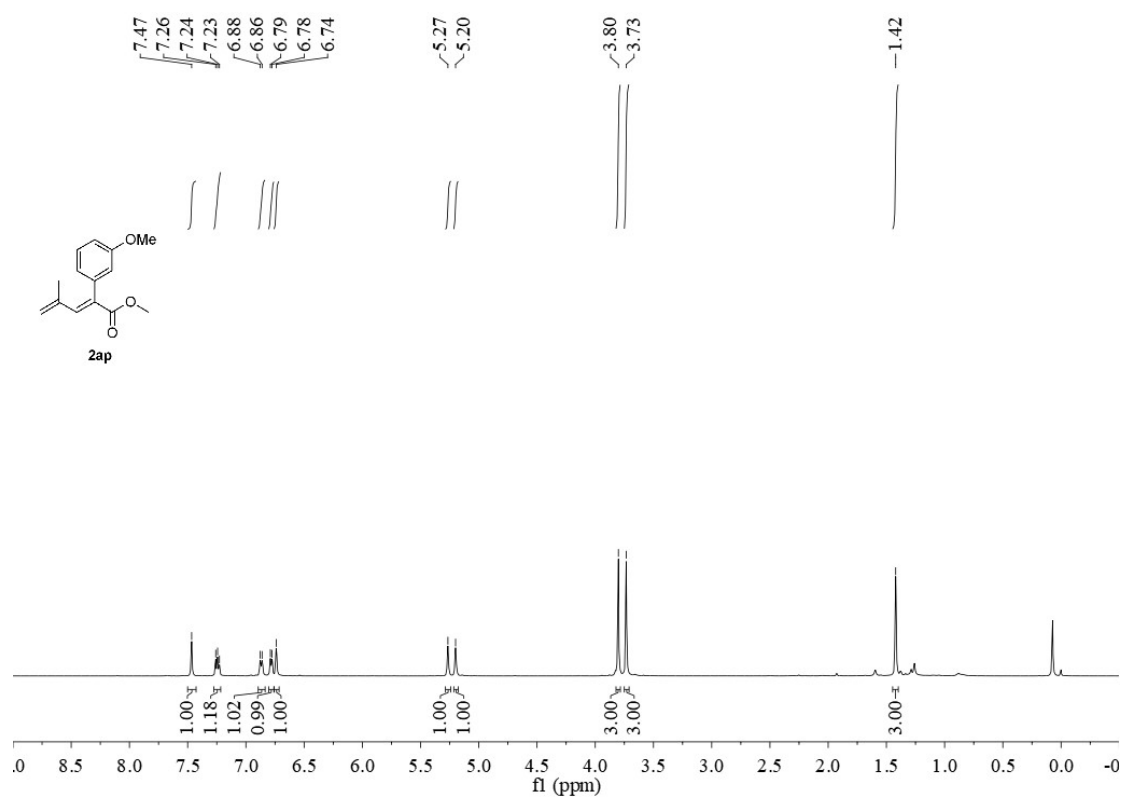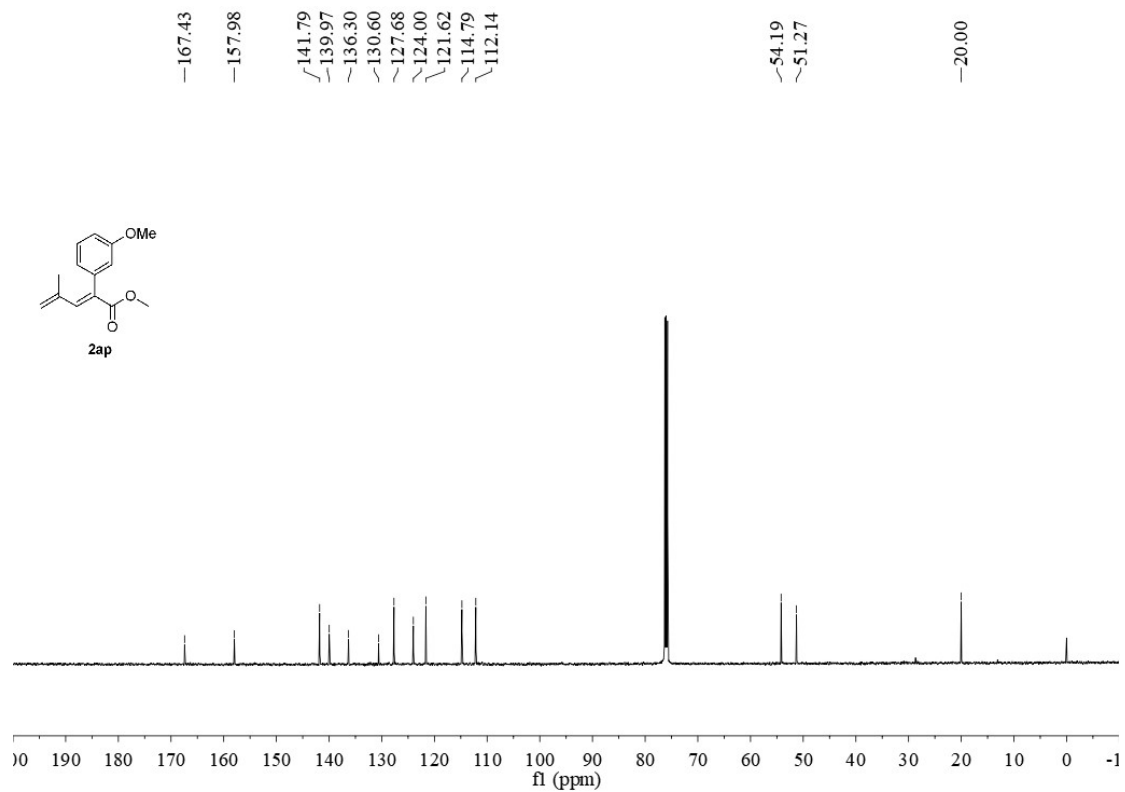

**2aq:**

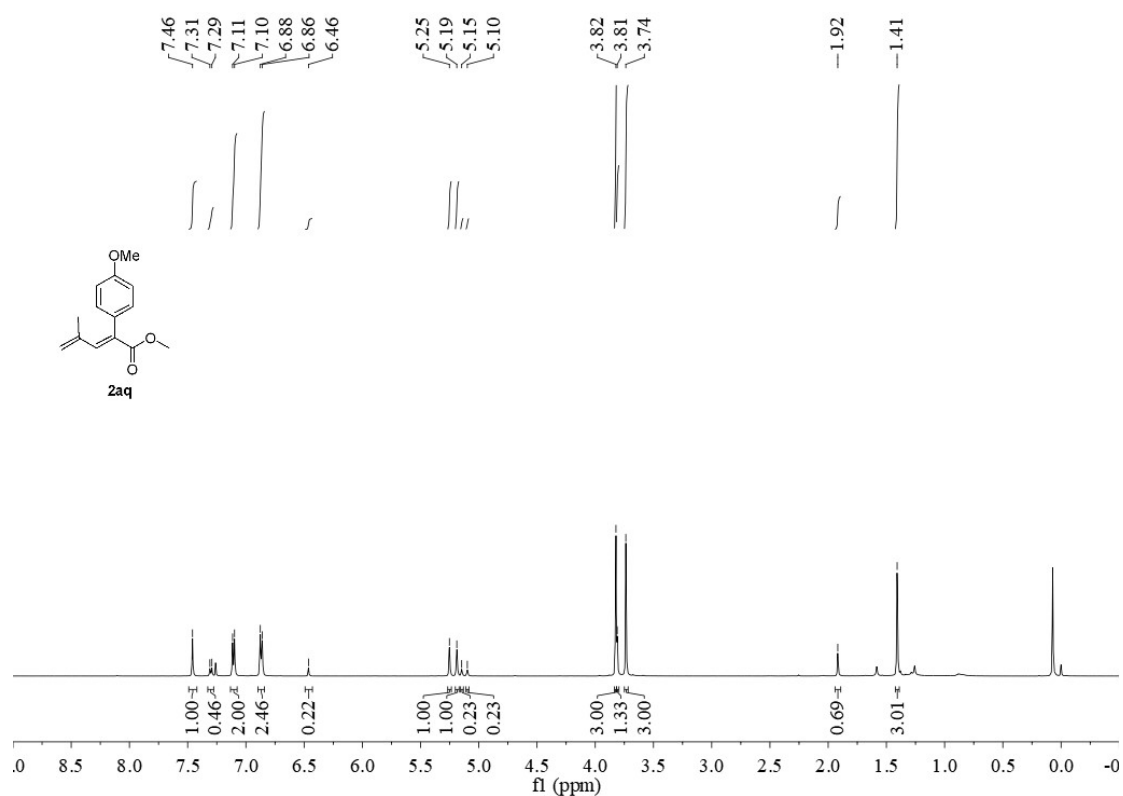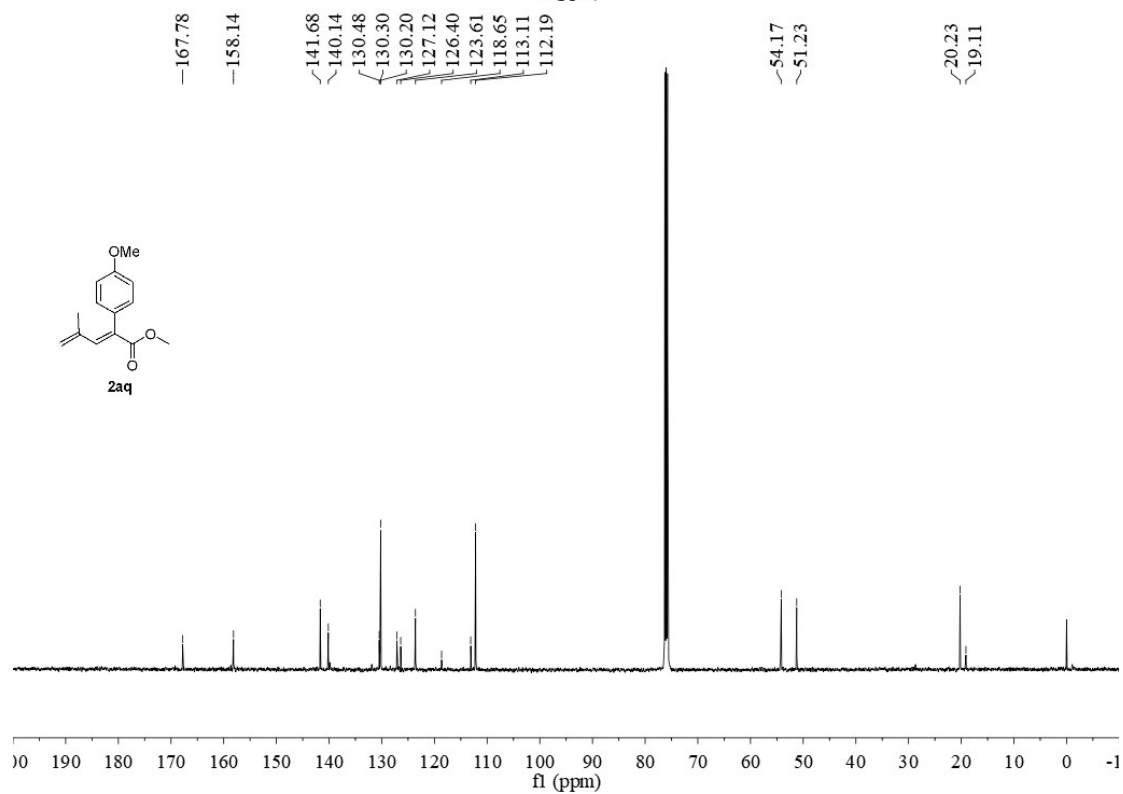

**2ar:**

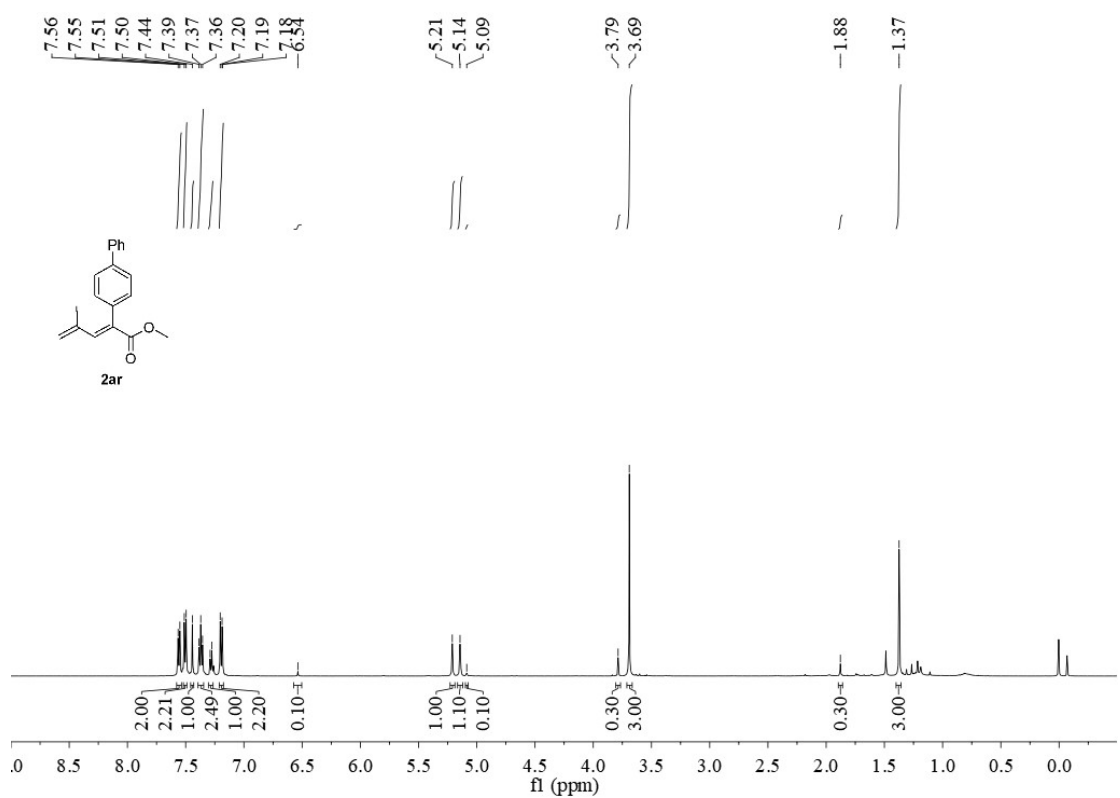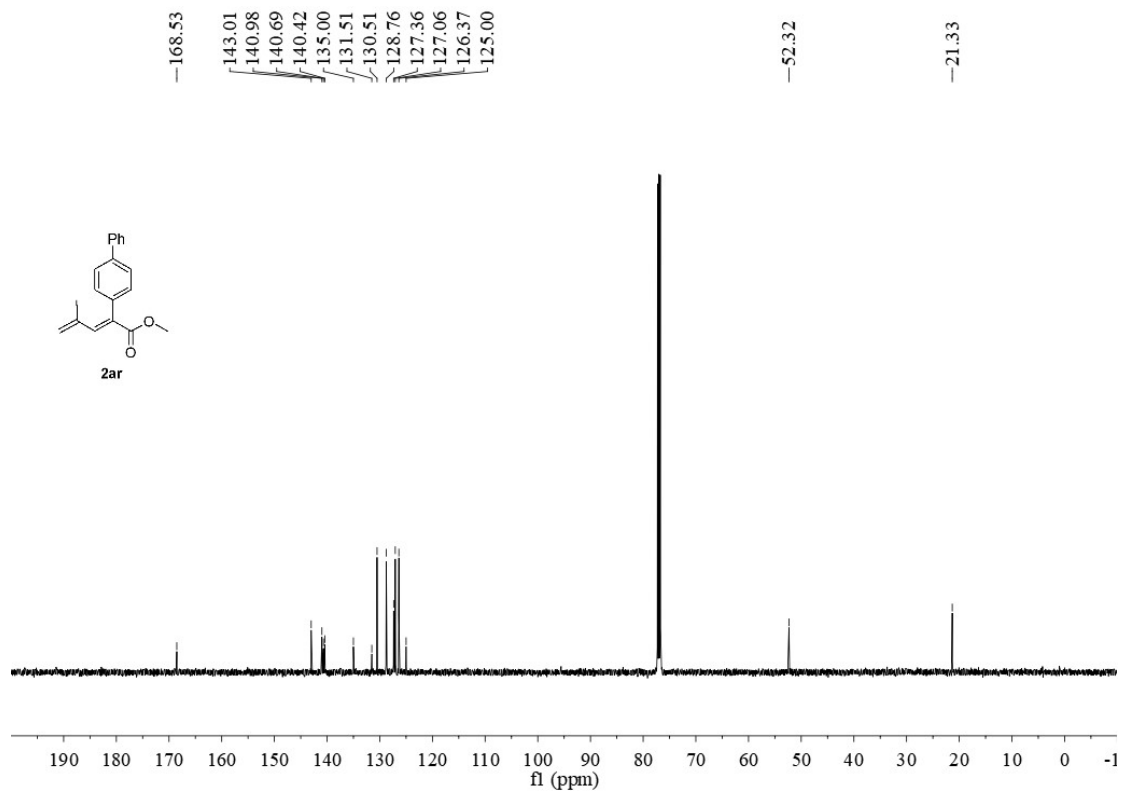

**2as:**

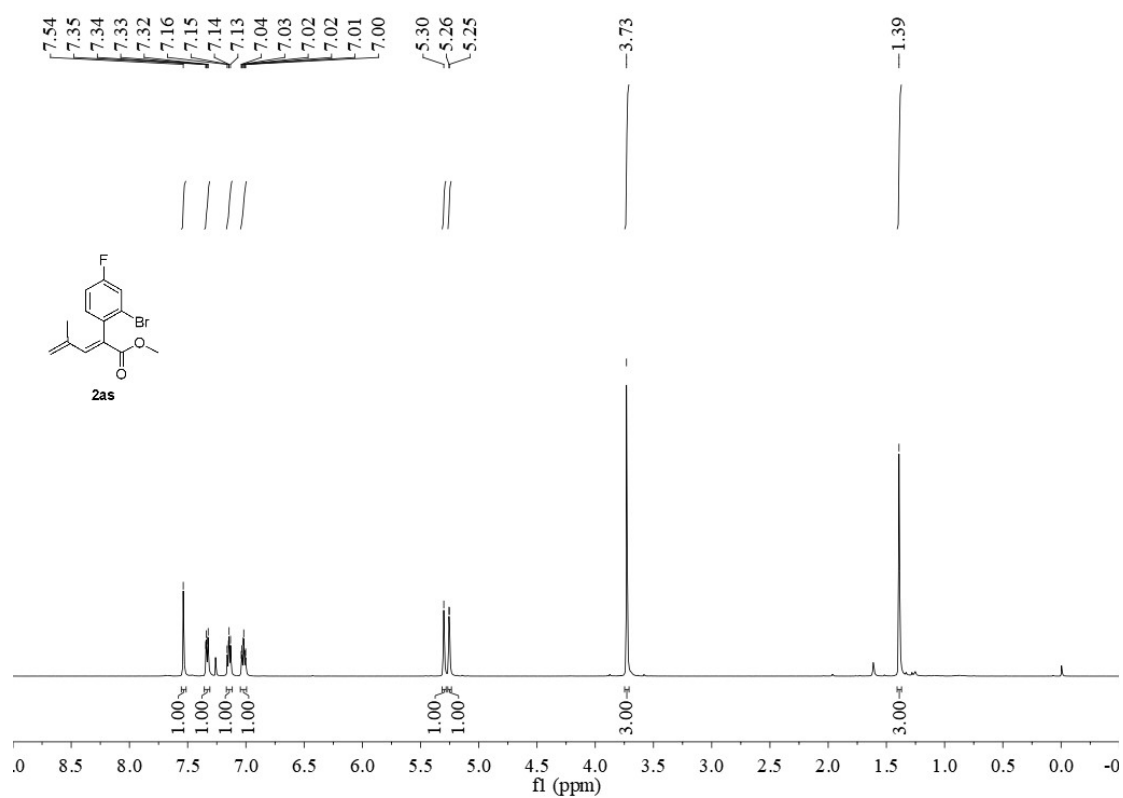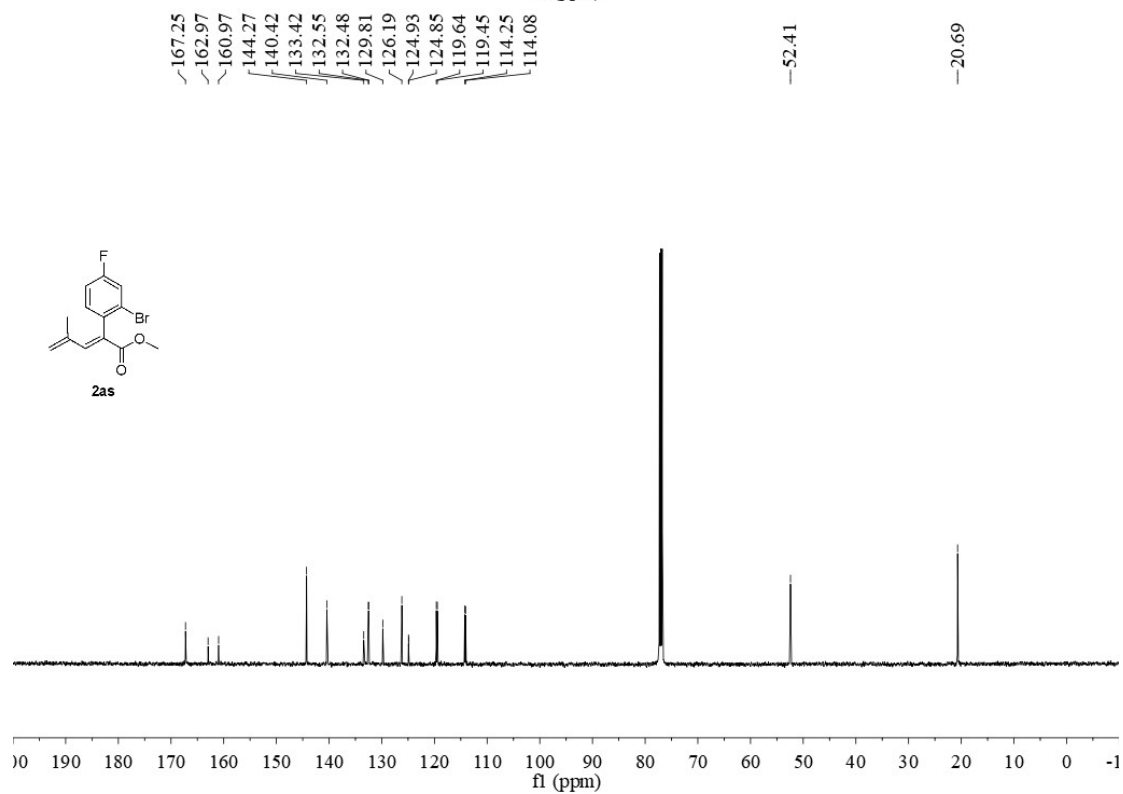

**2at:**

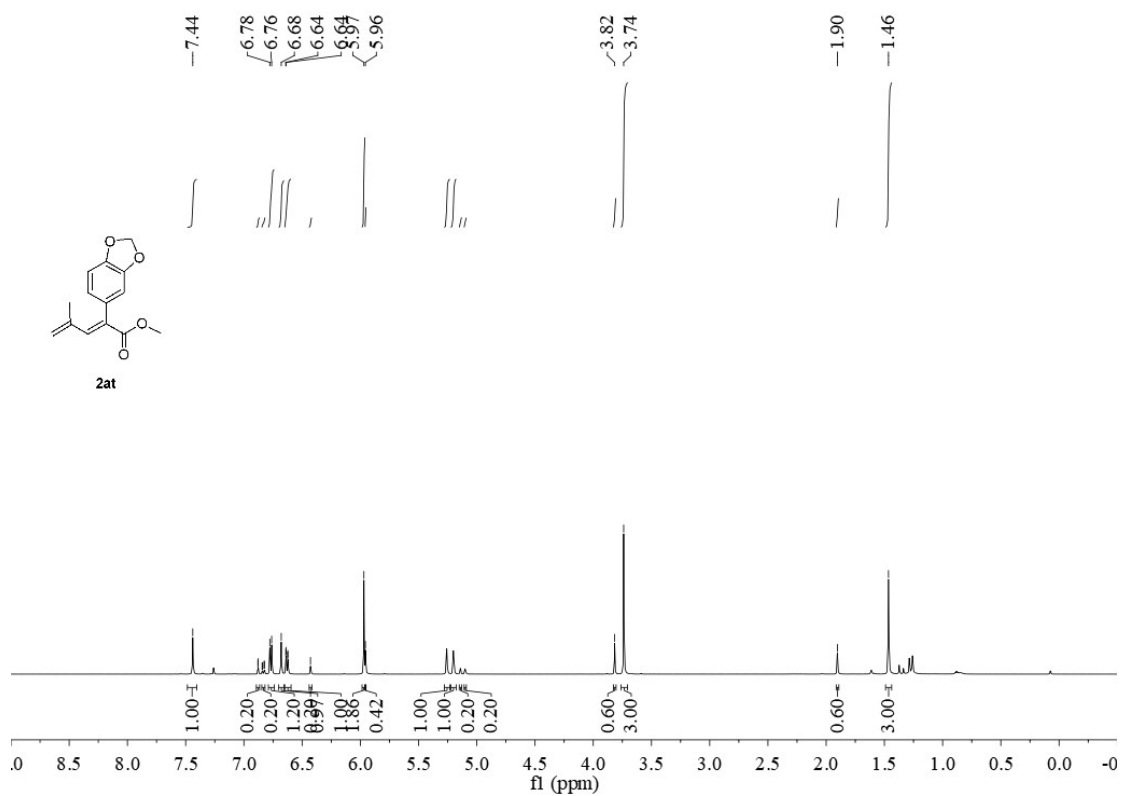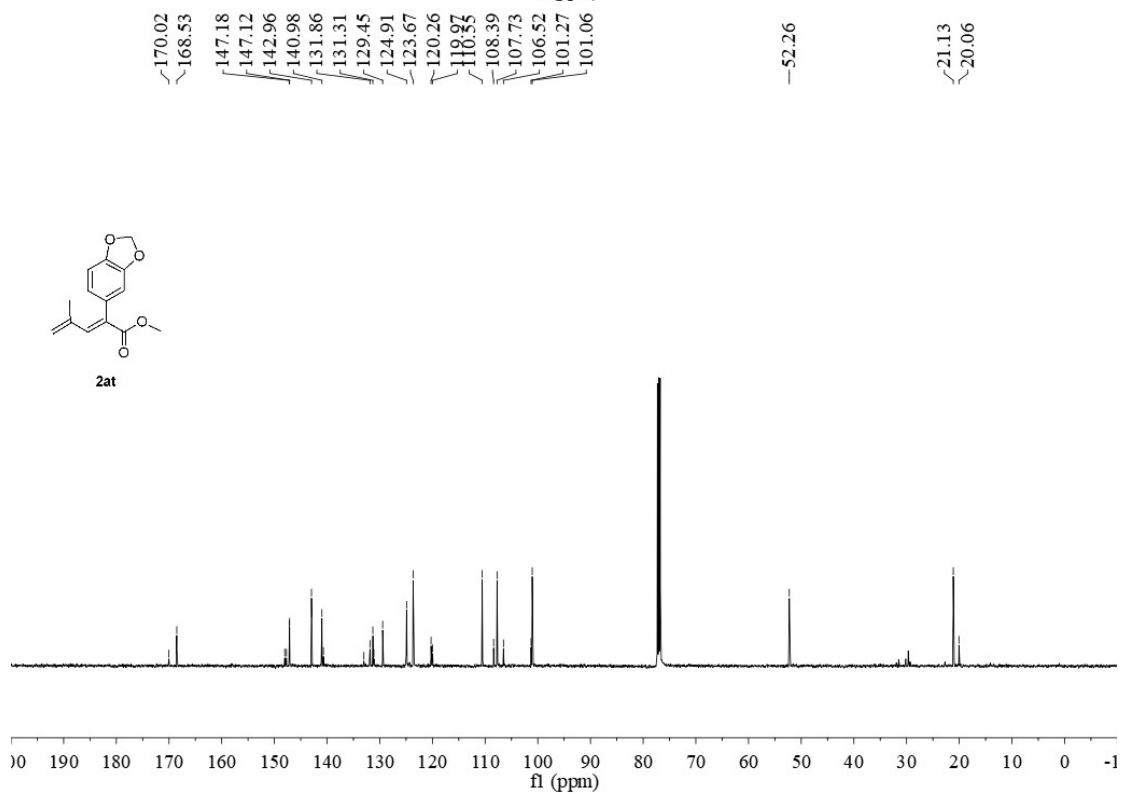

**2au:**

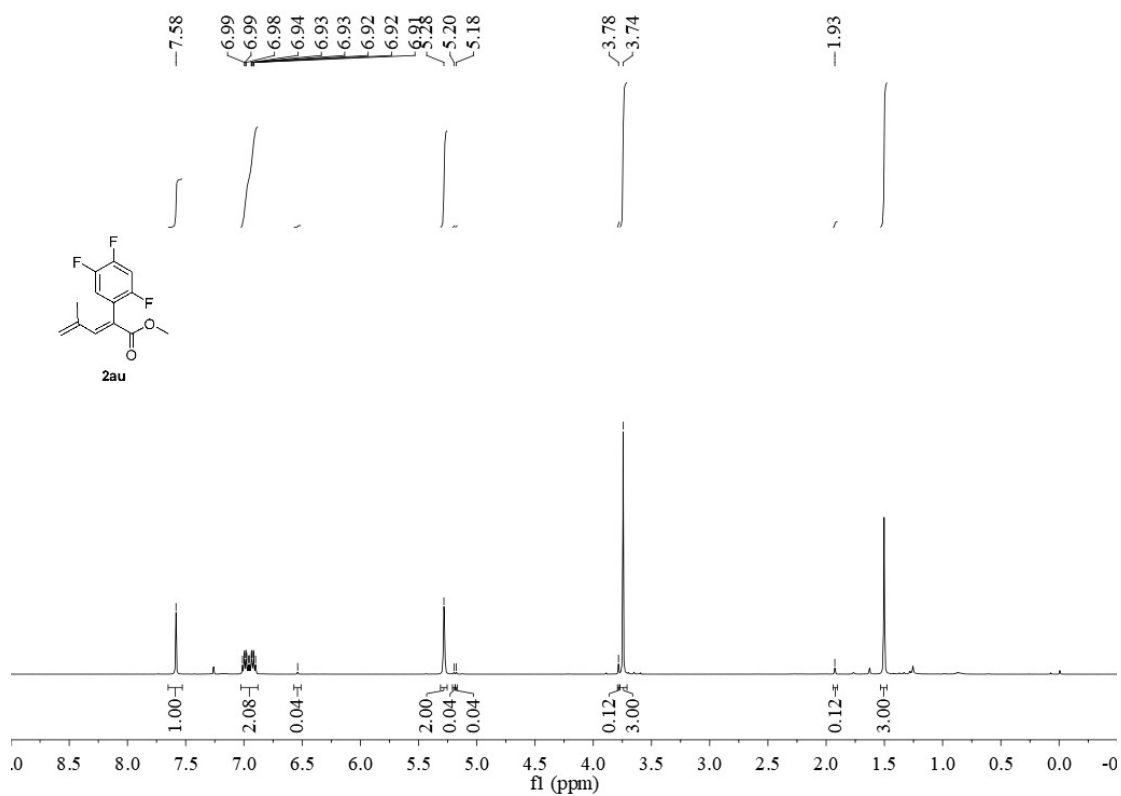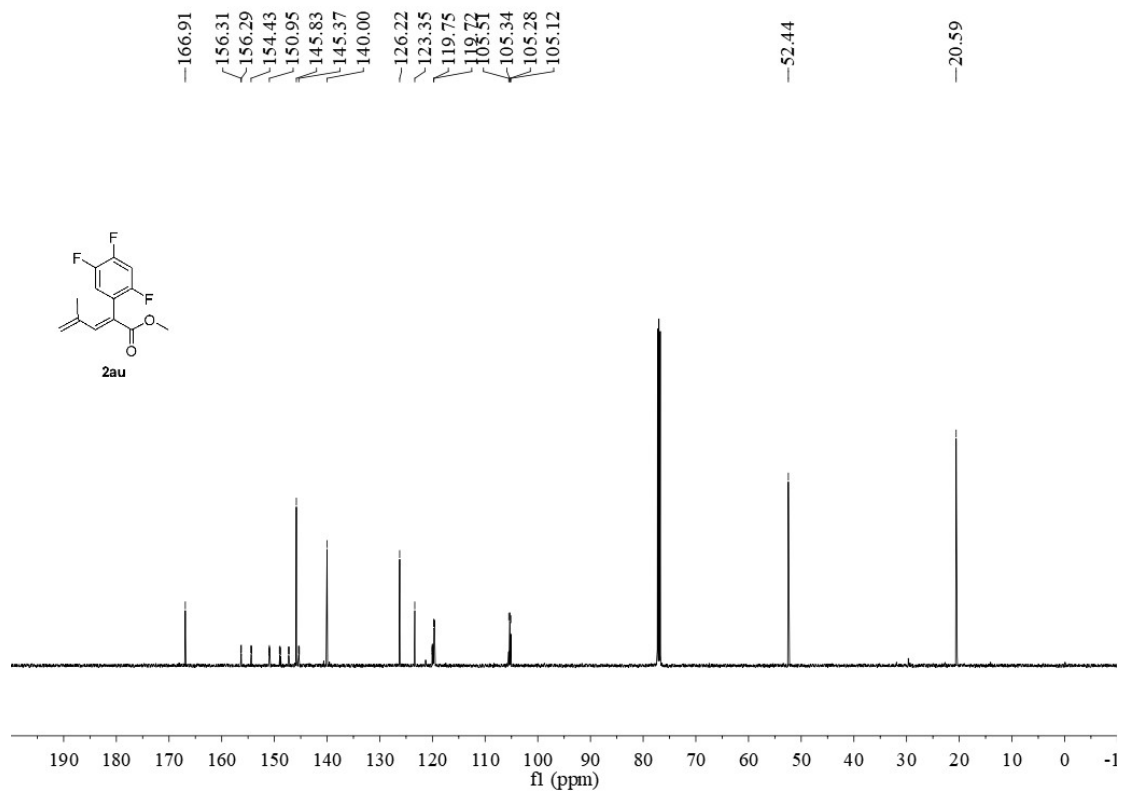

**2av:**

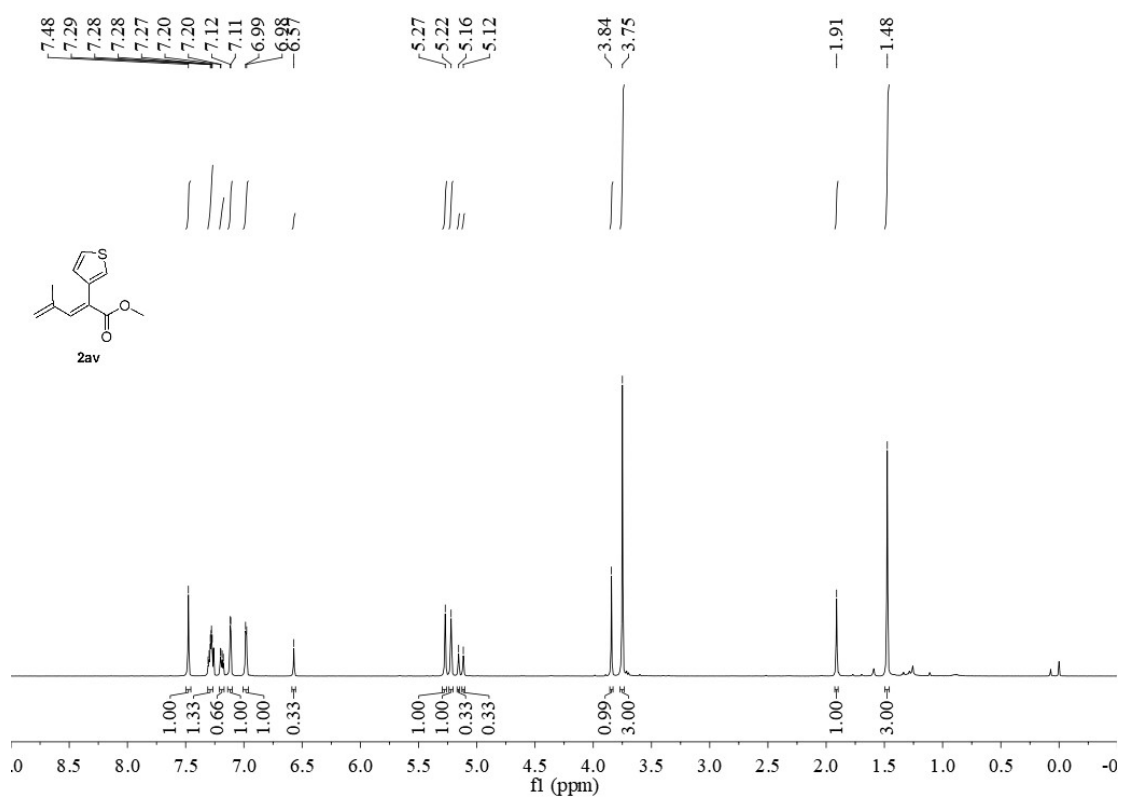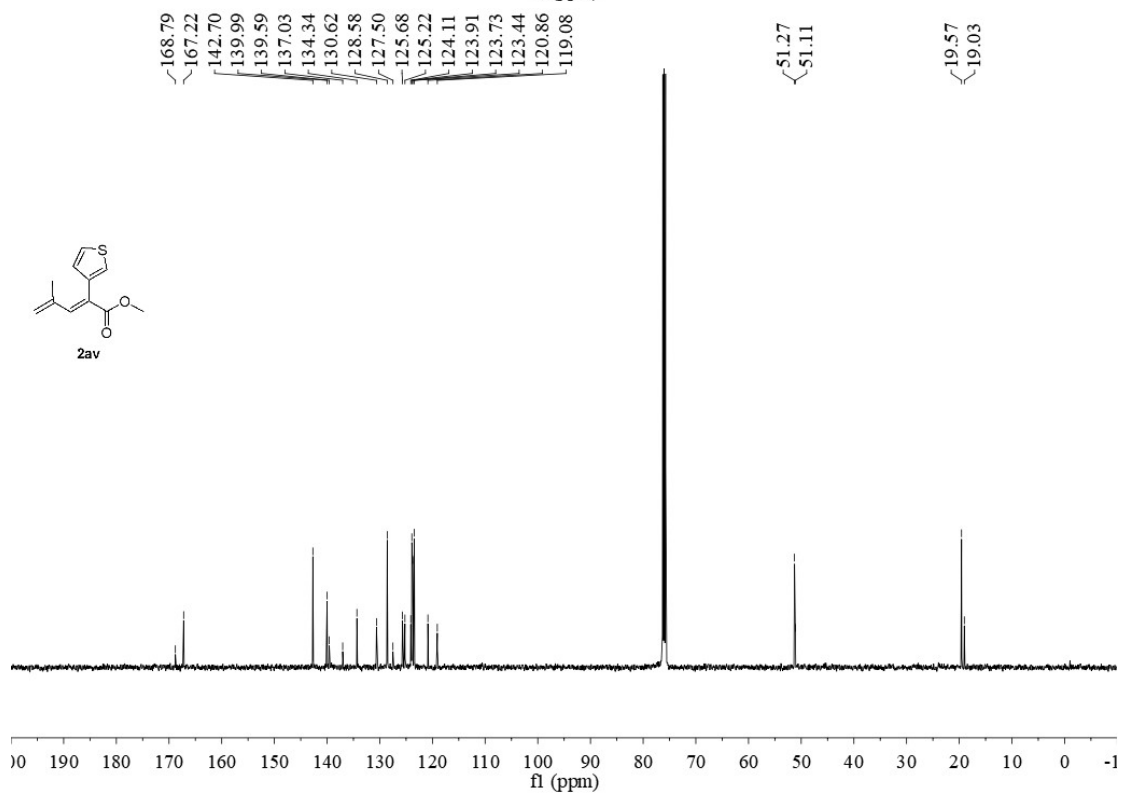

**2aw:**

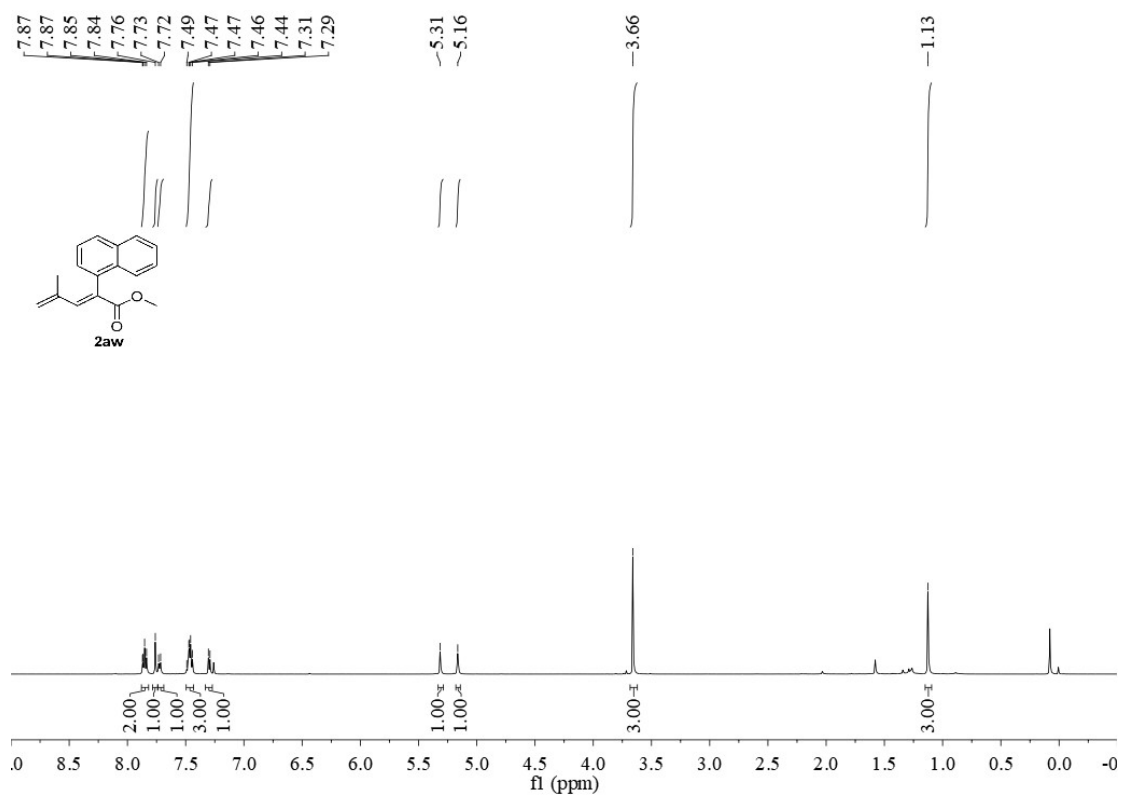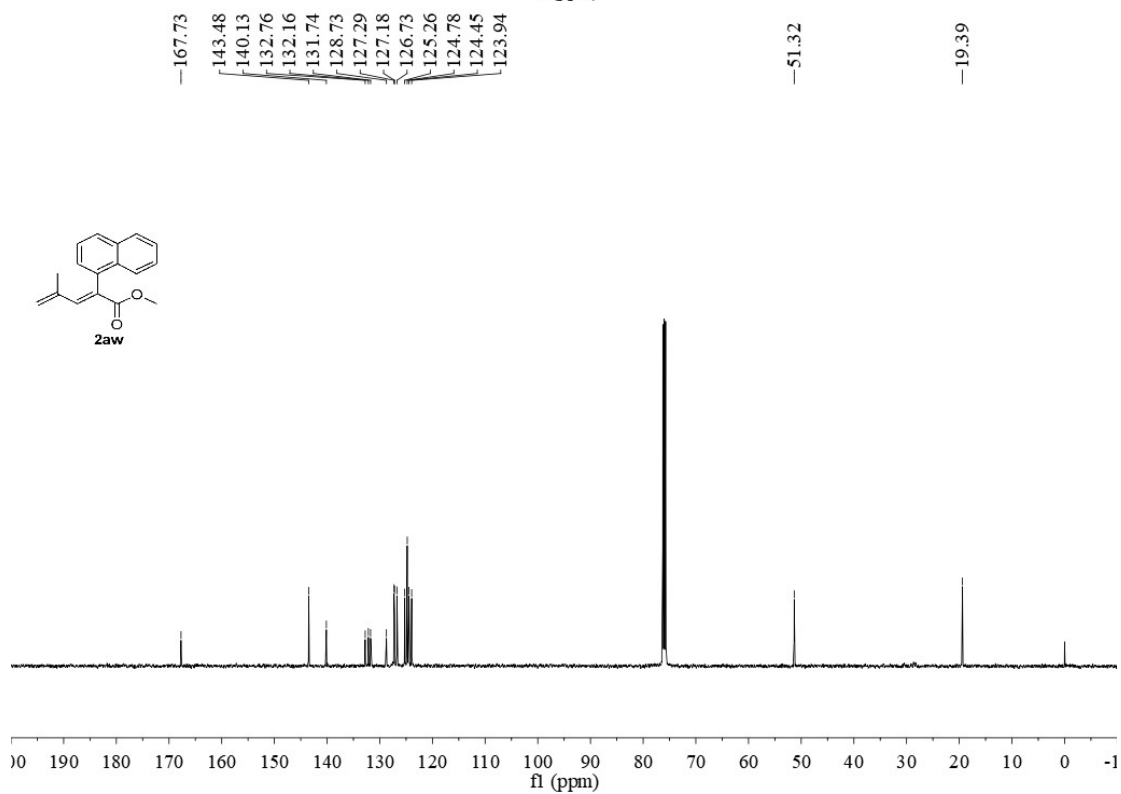

**2ax:**

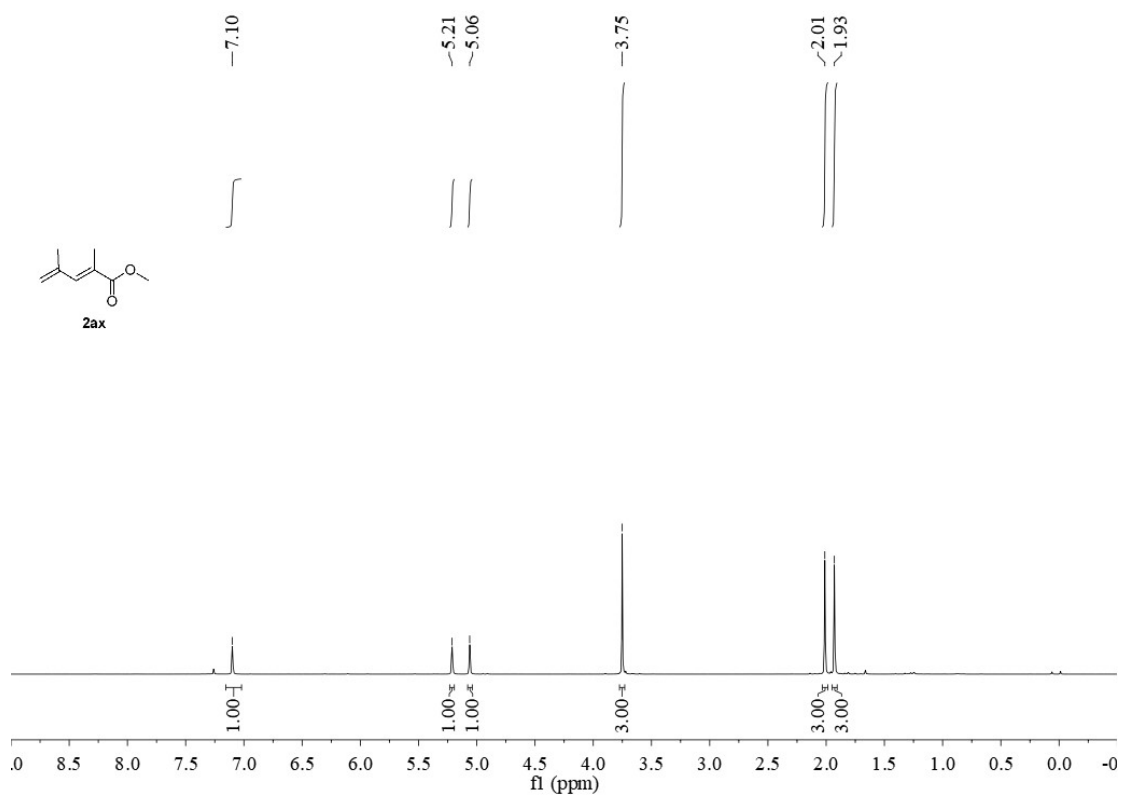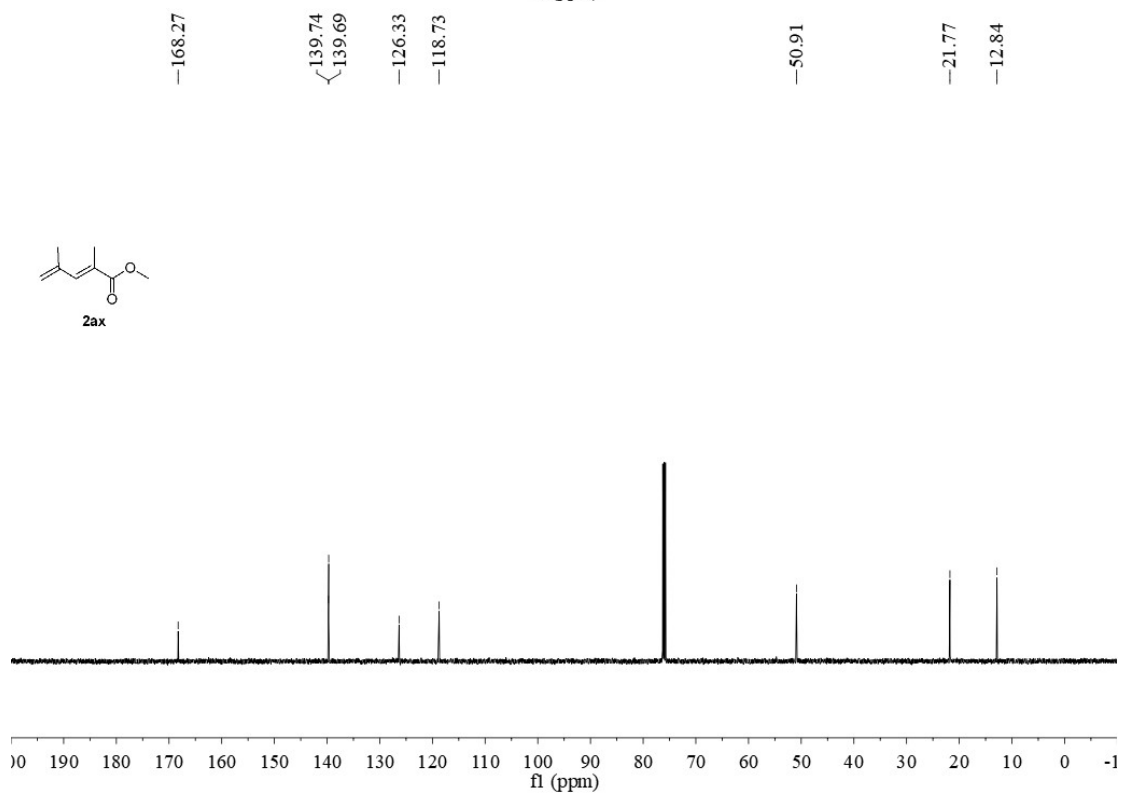

**2ay:**

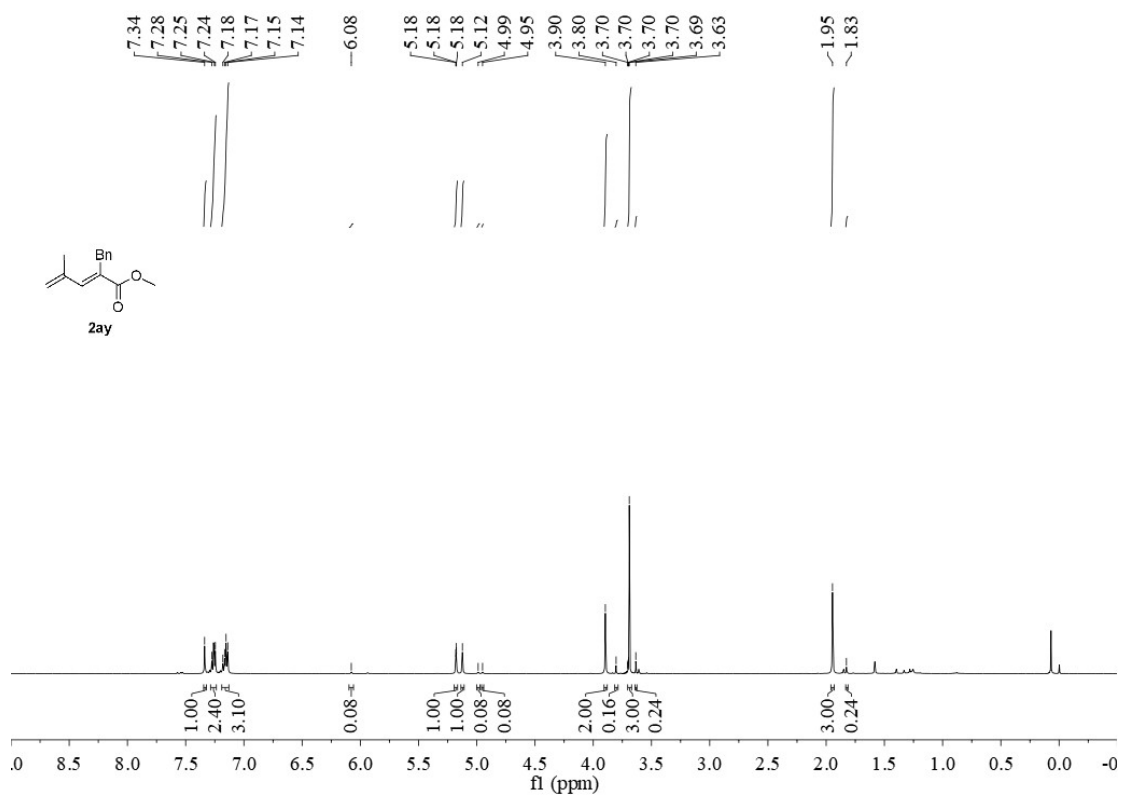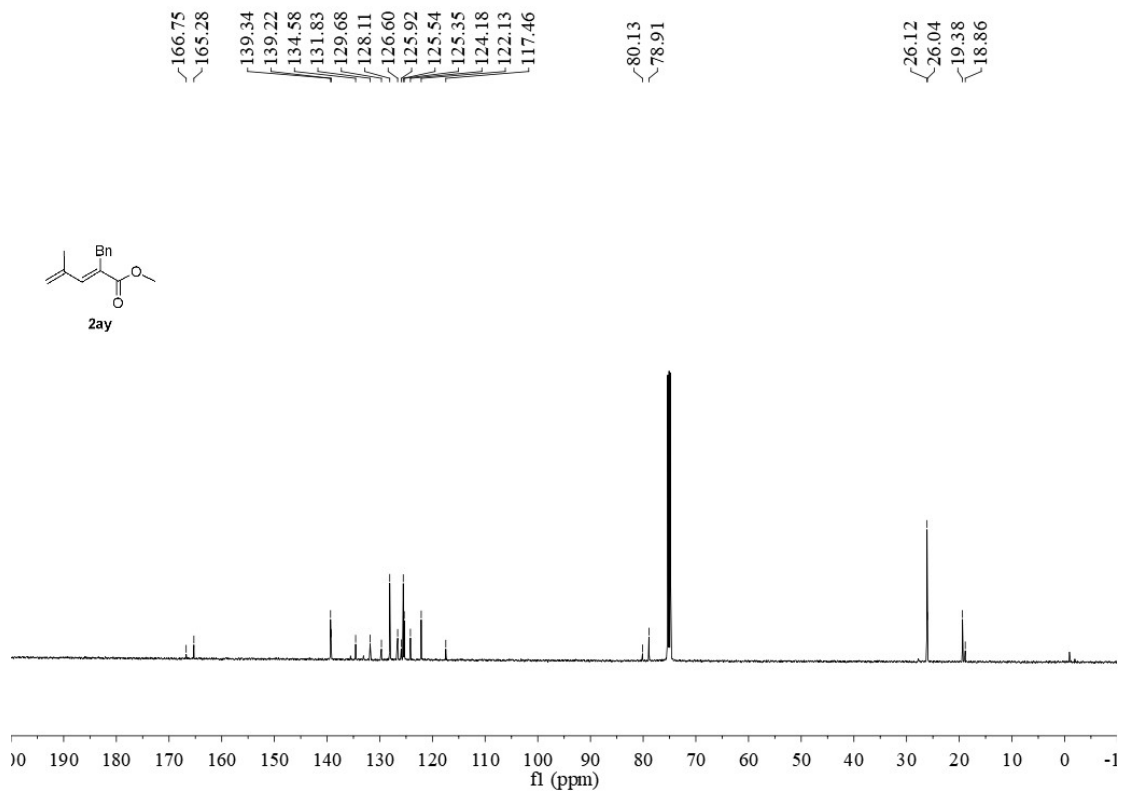

**2ba:**

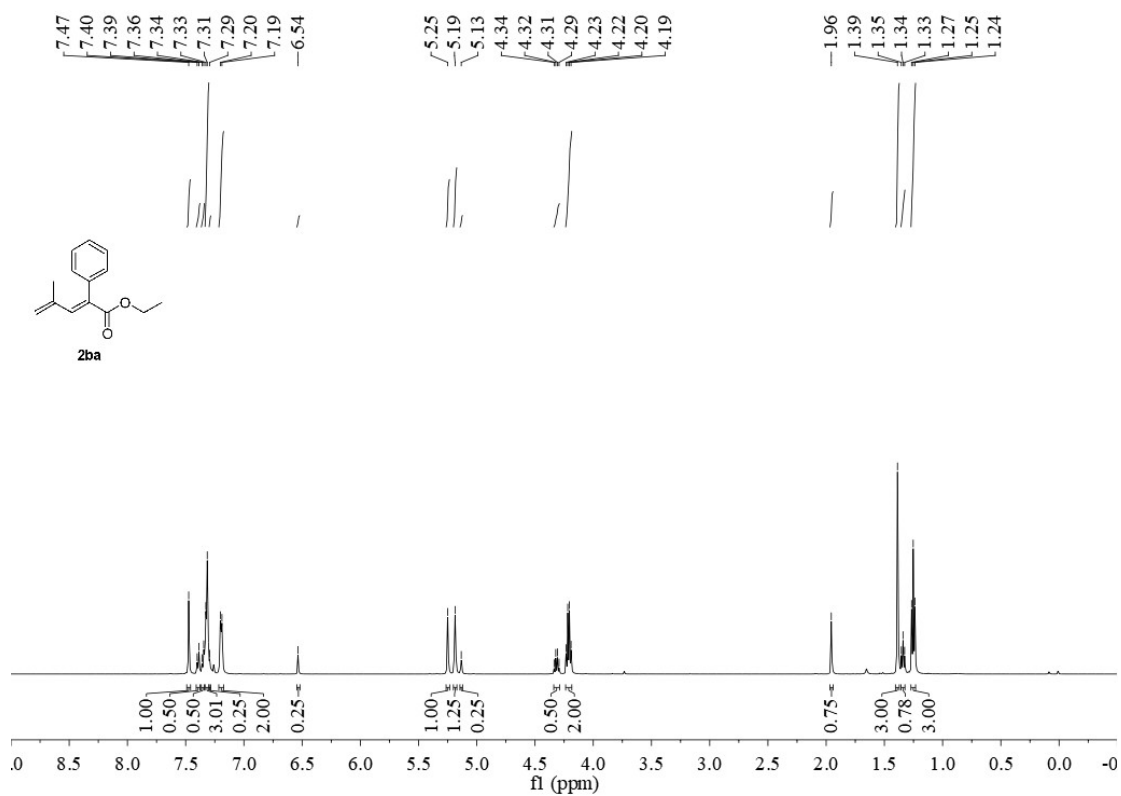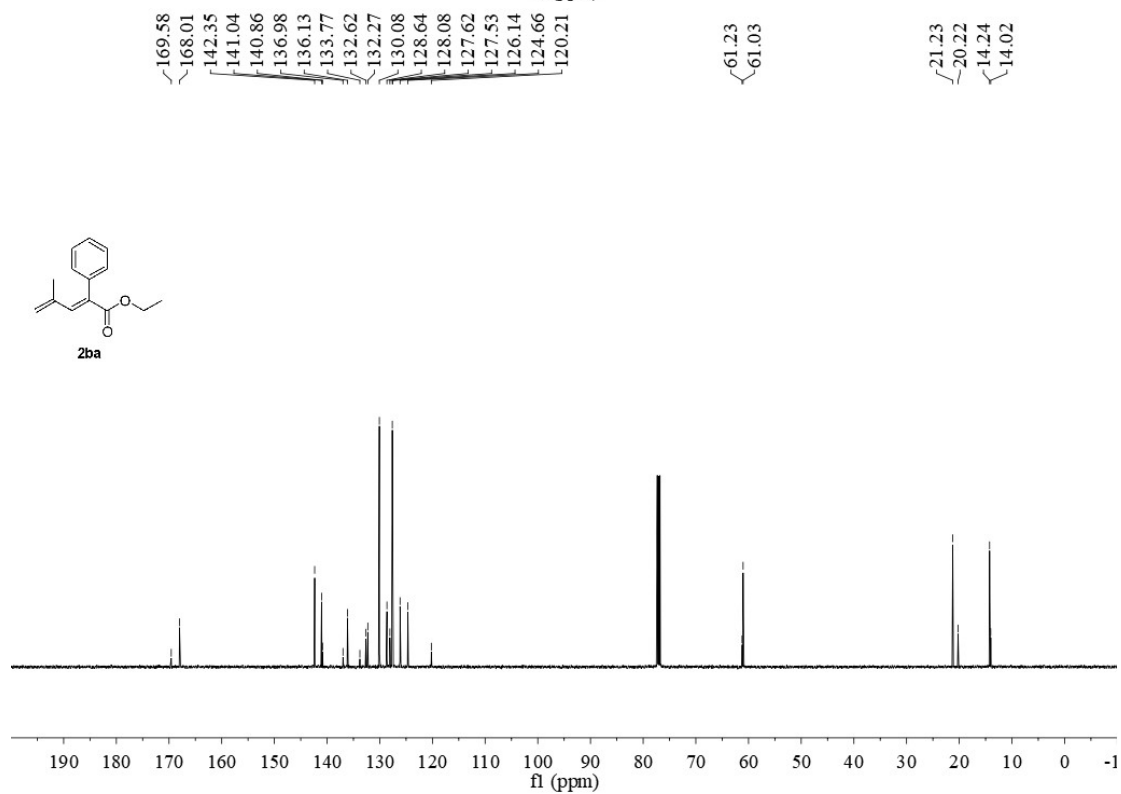

**2ca:**

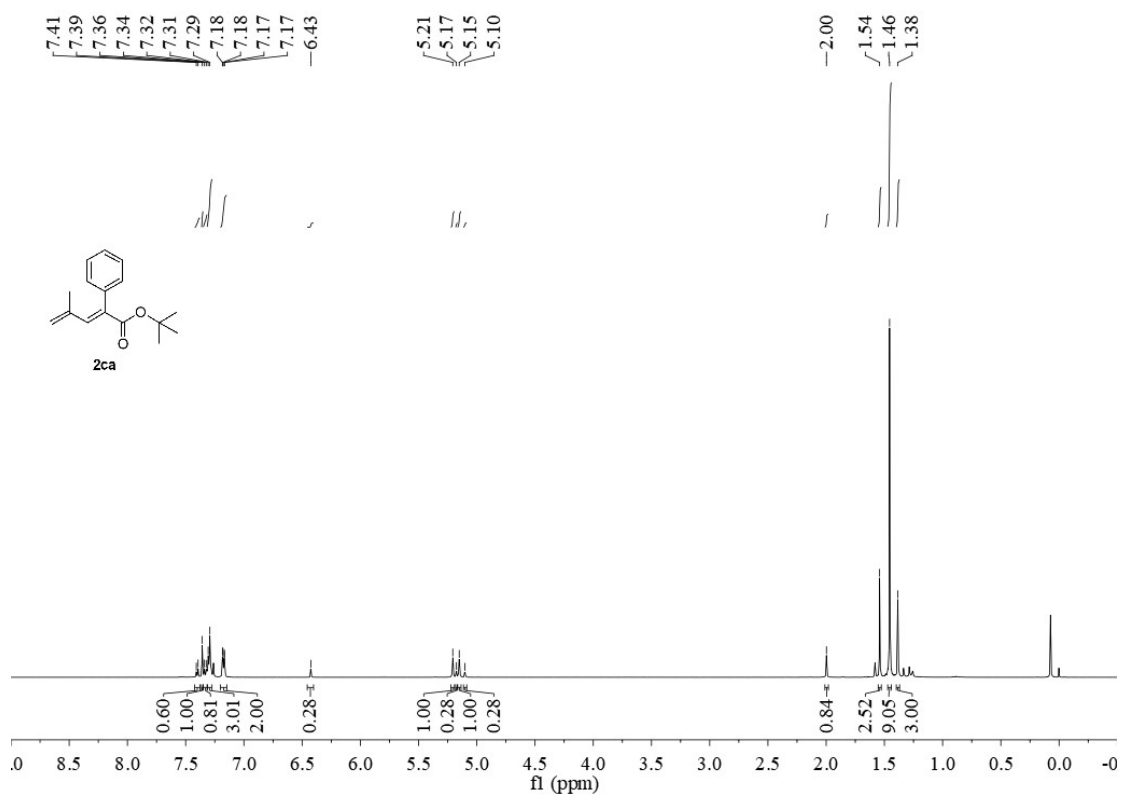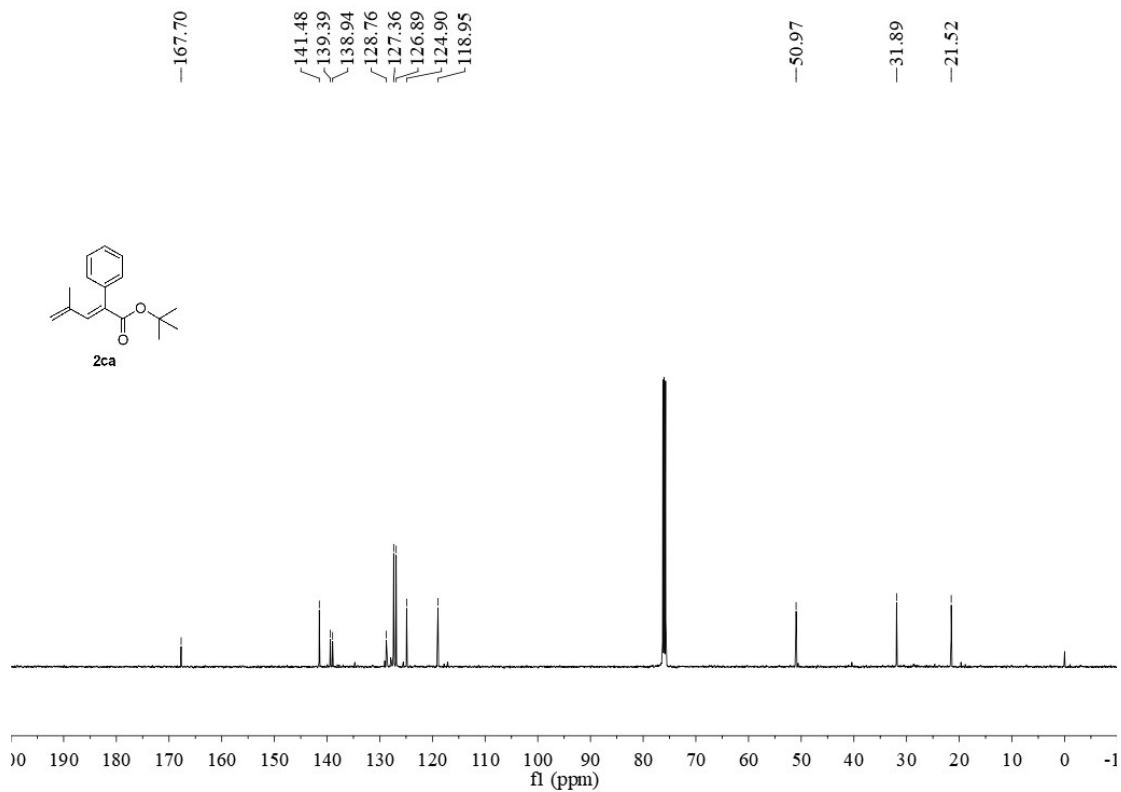

**2da:**

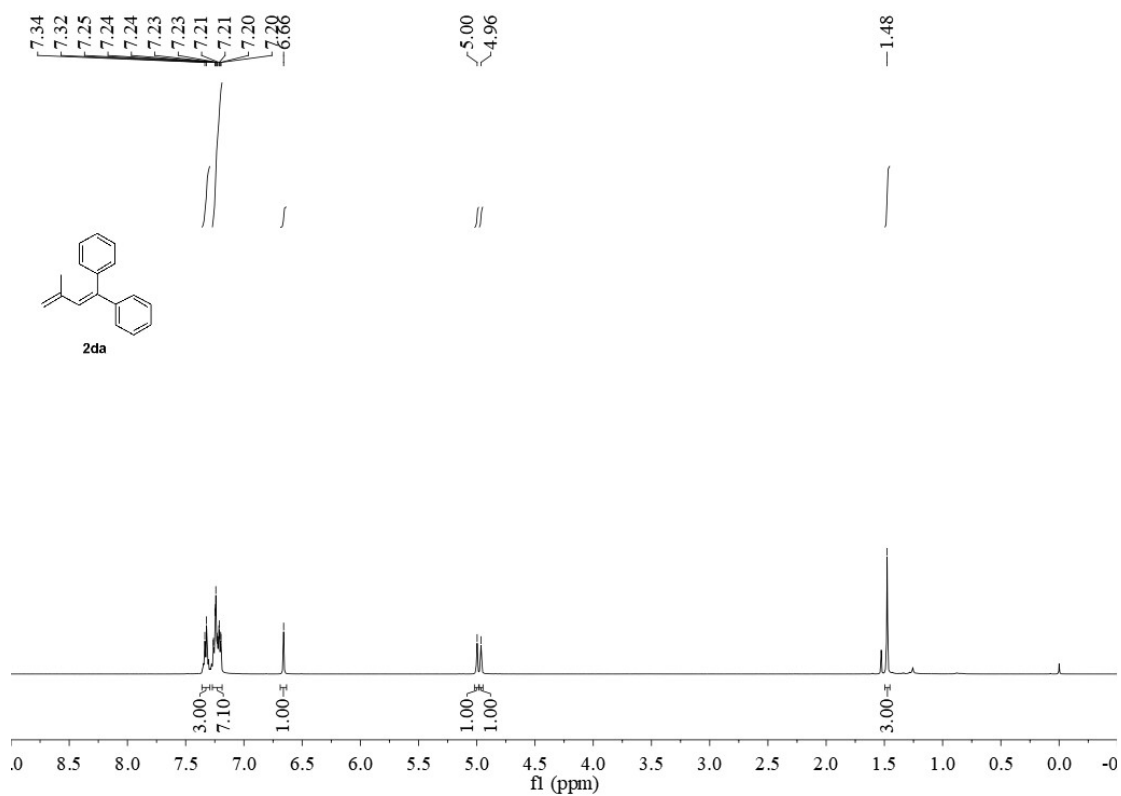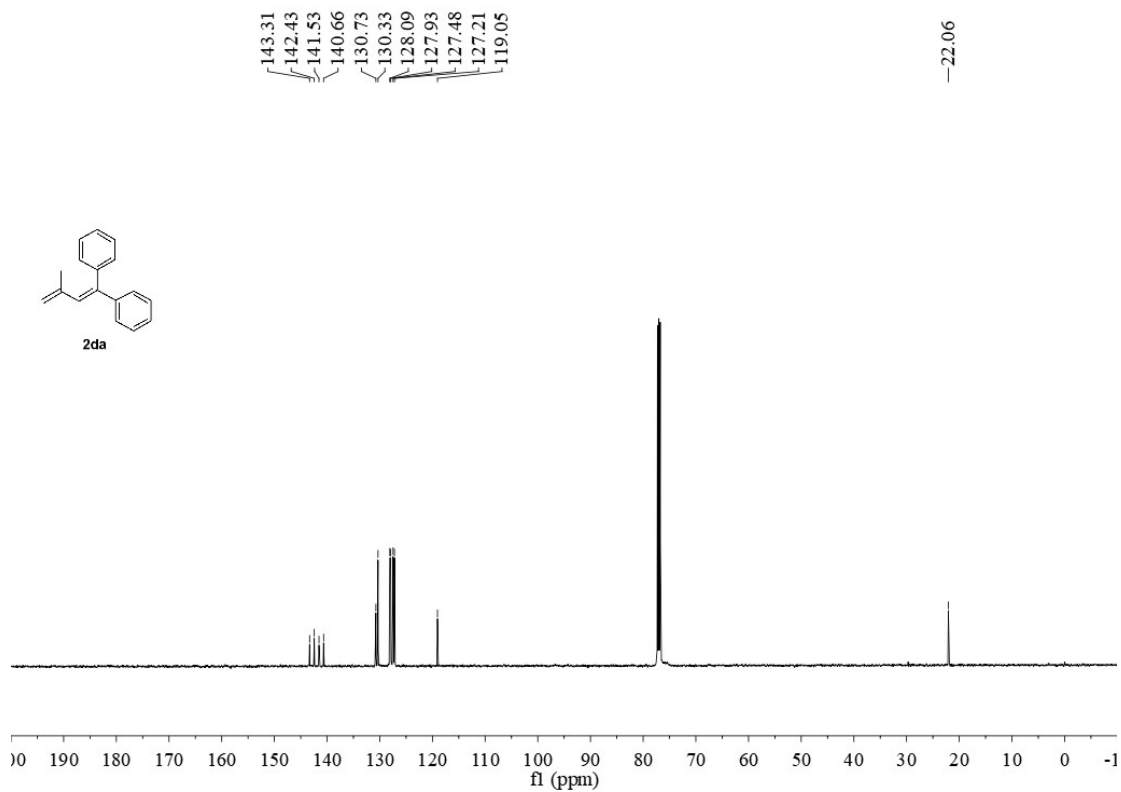

**2ea:**

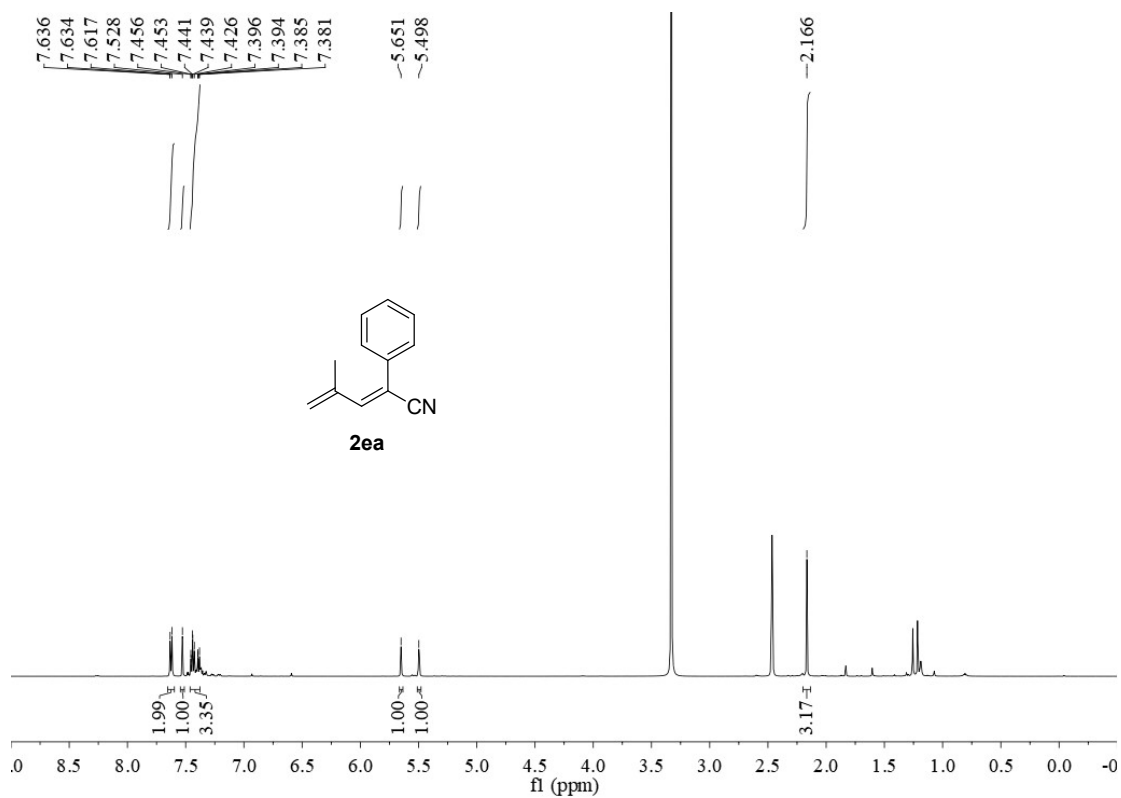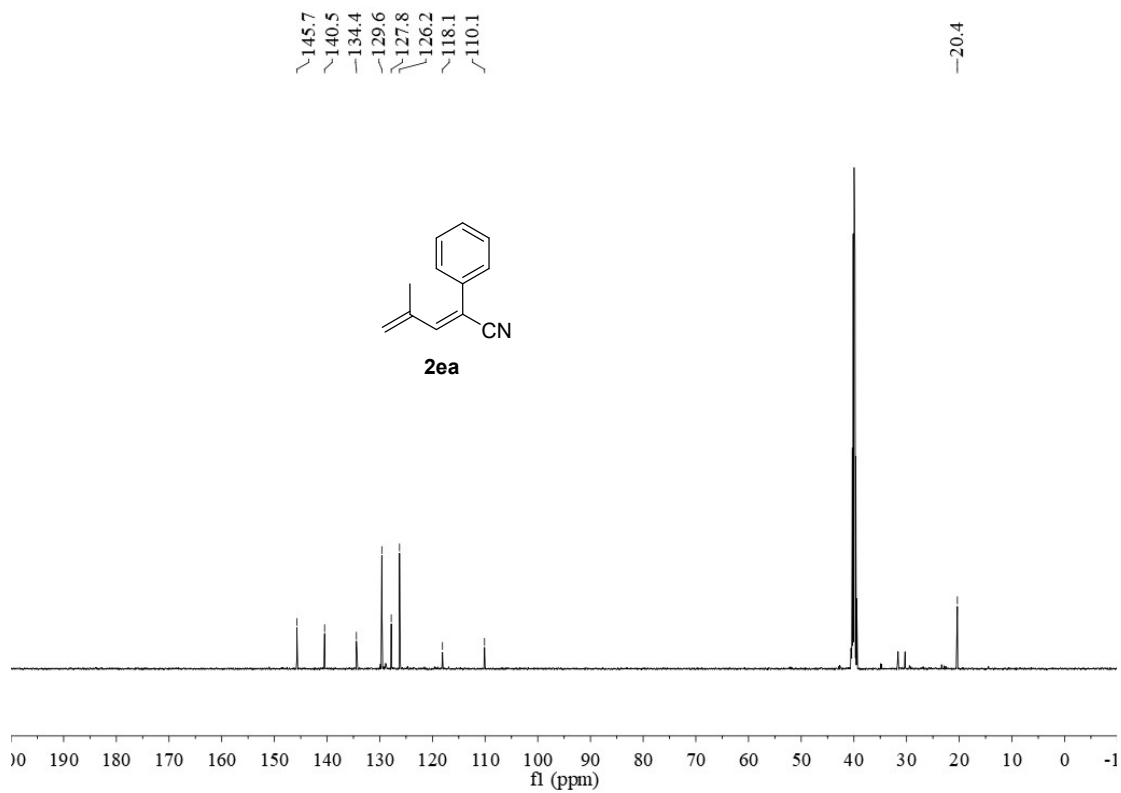

3:

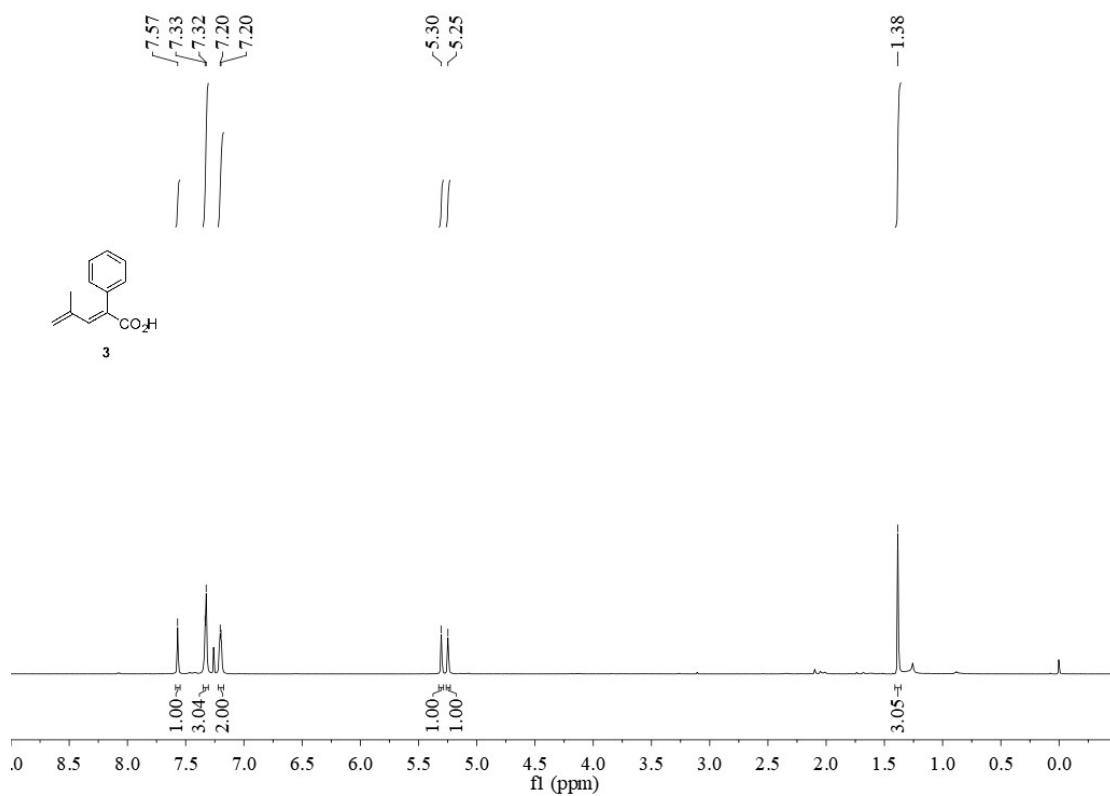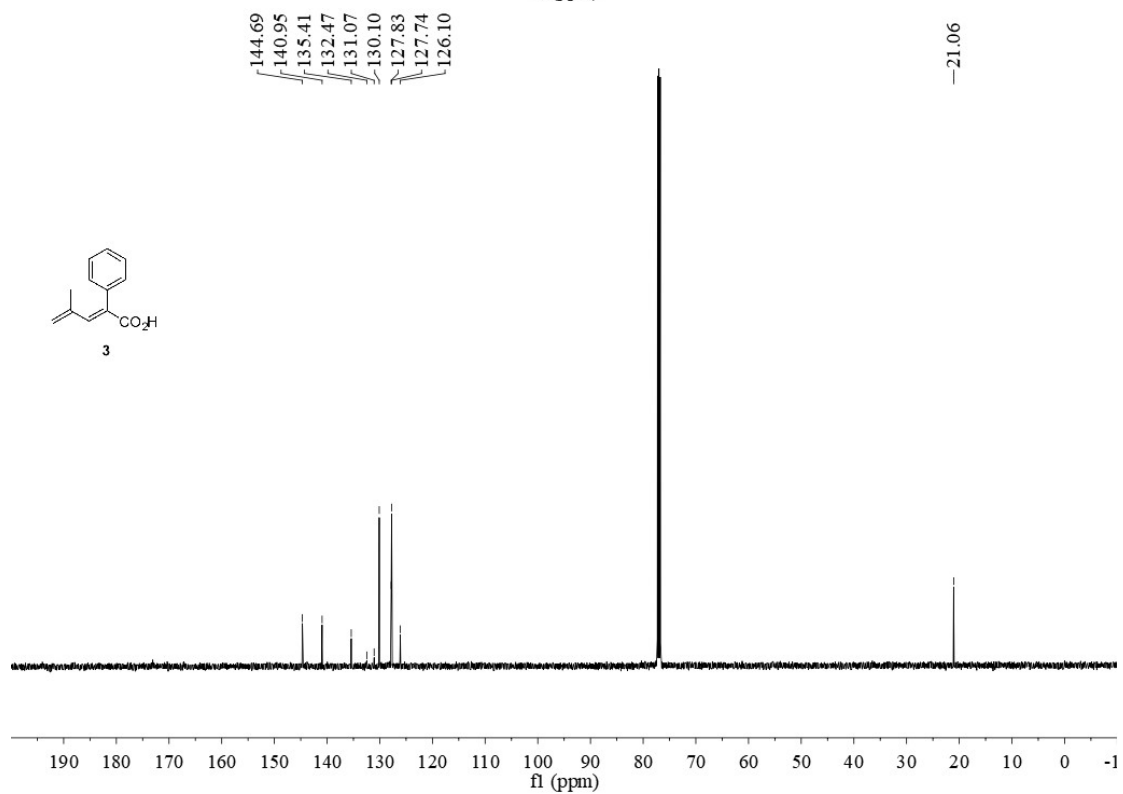

5:

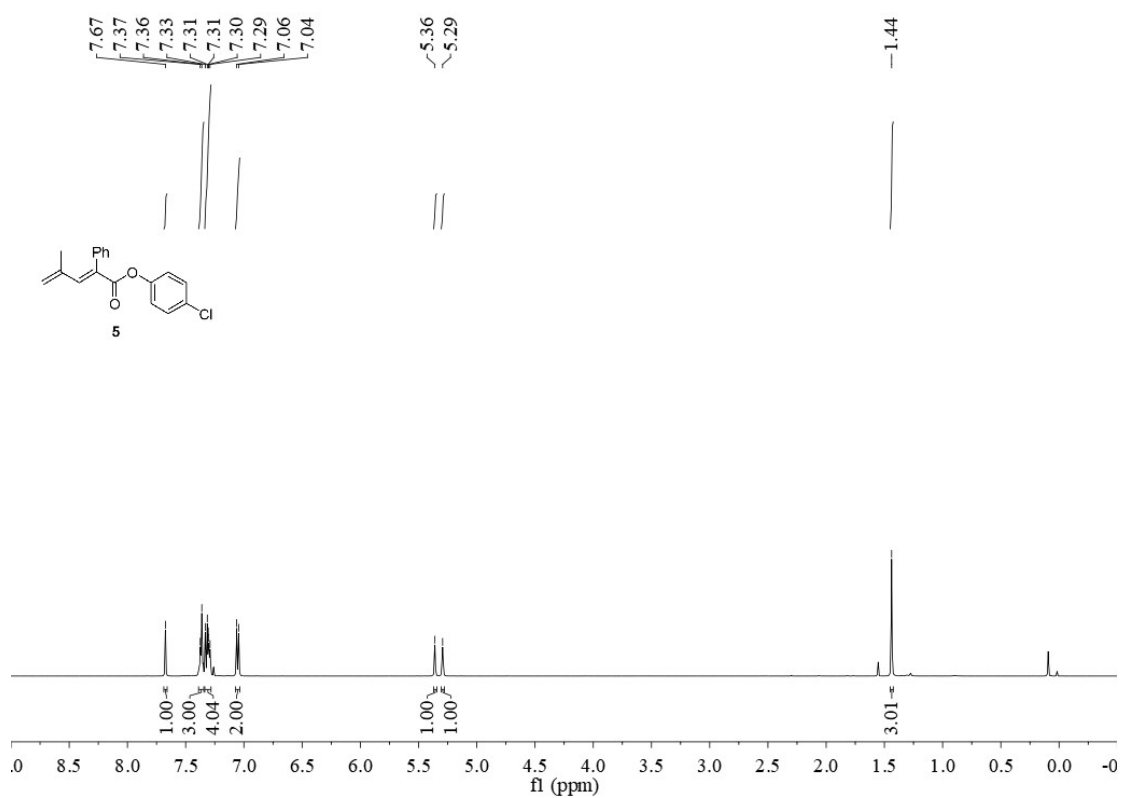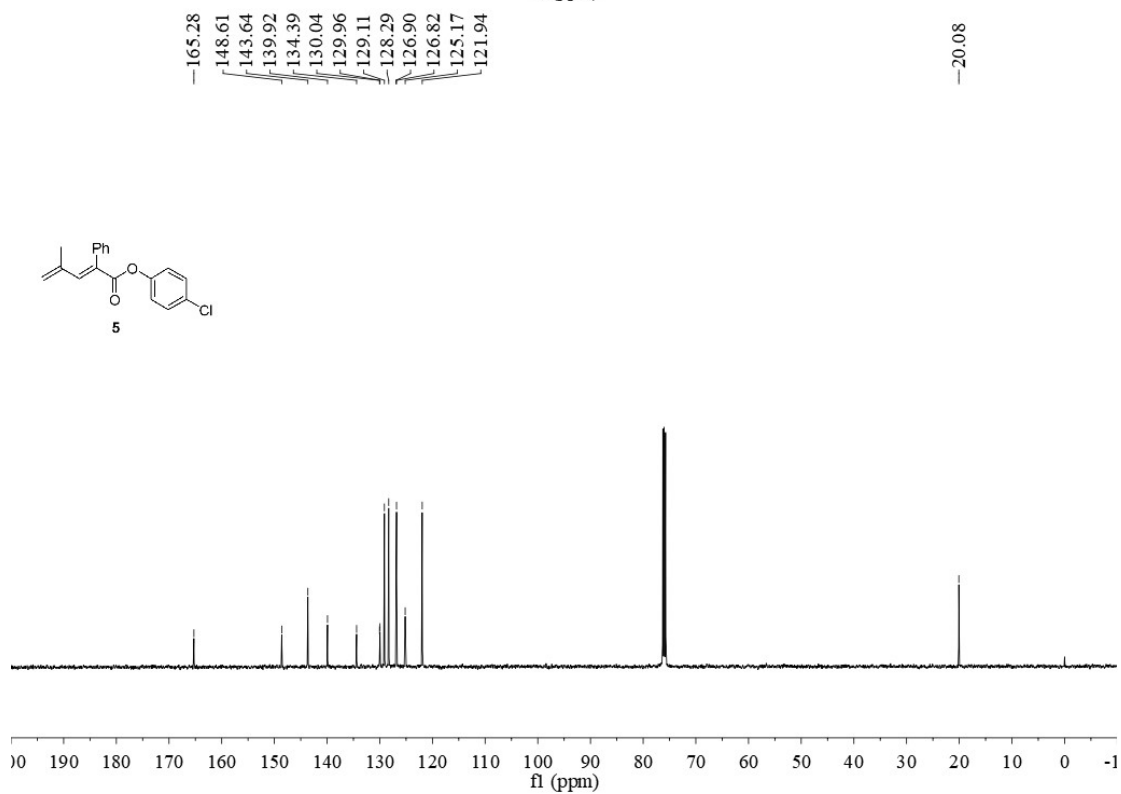

6:

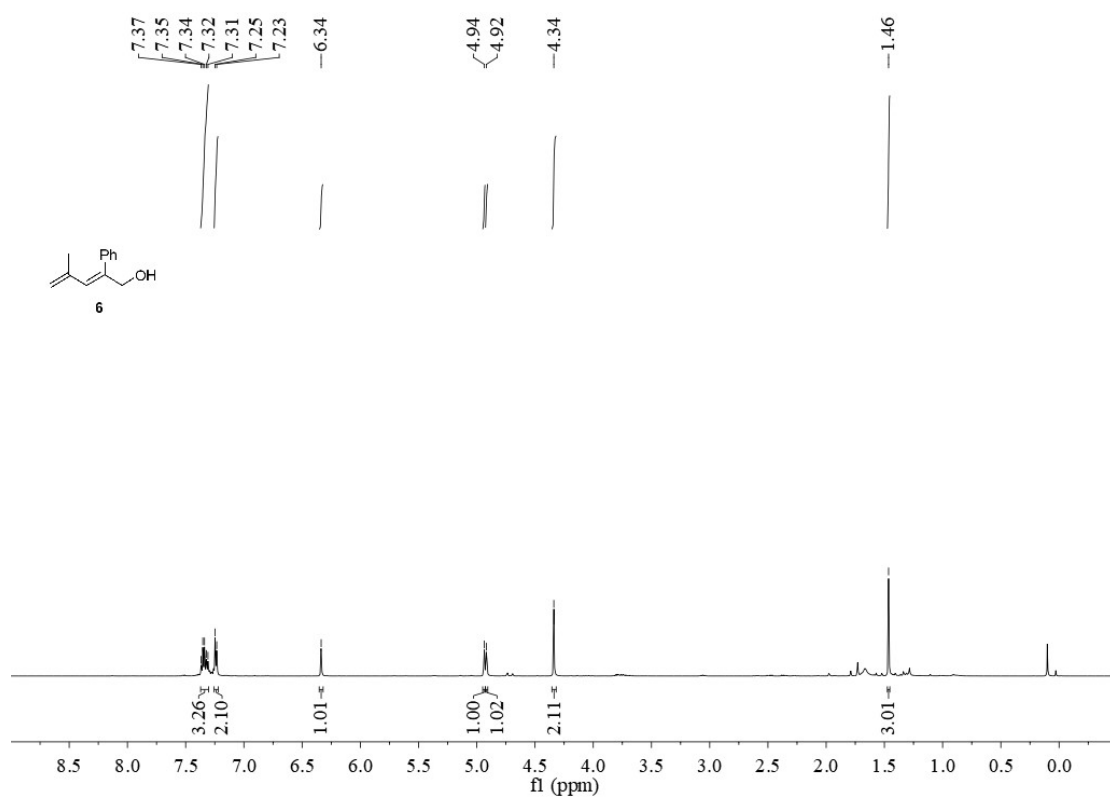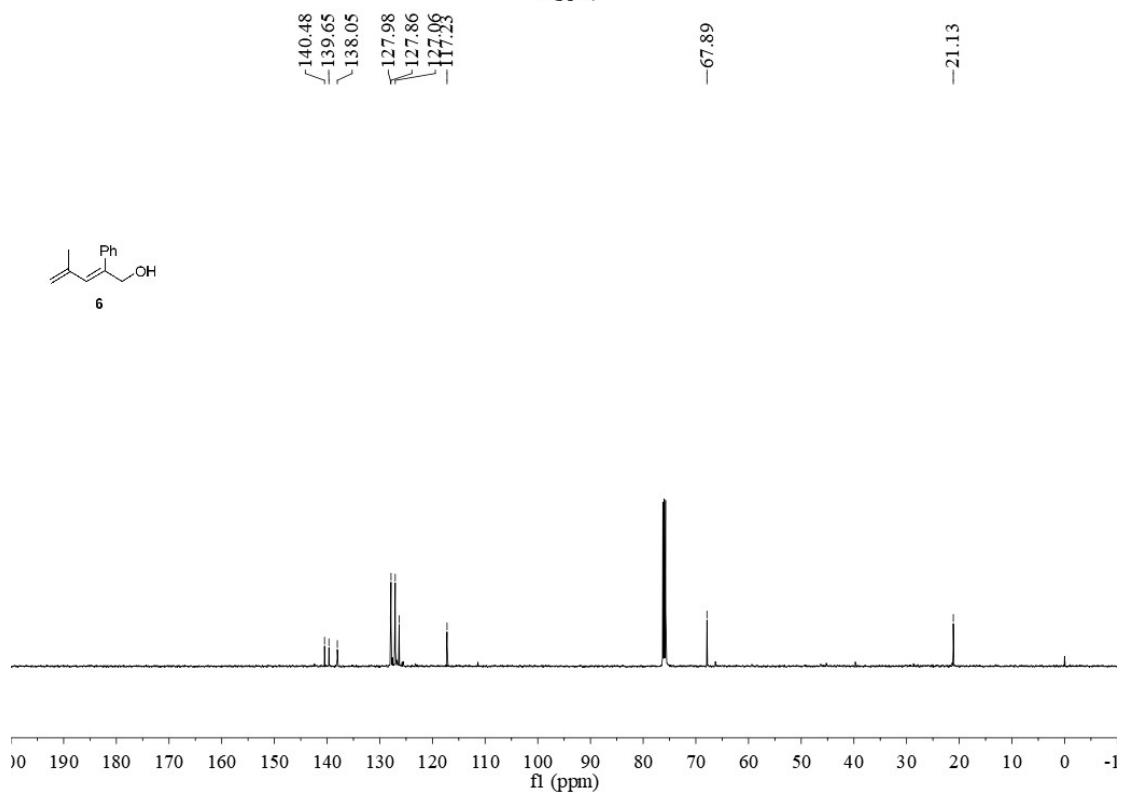

8:

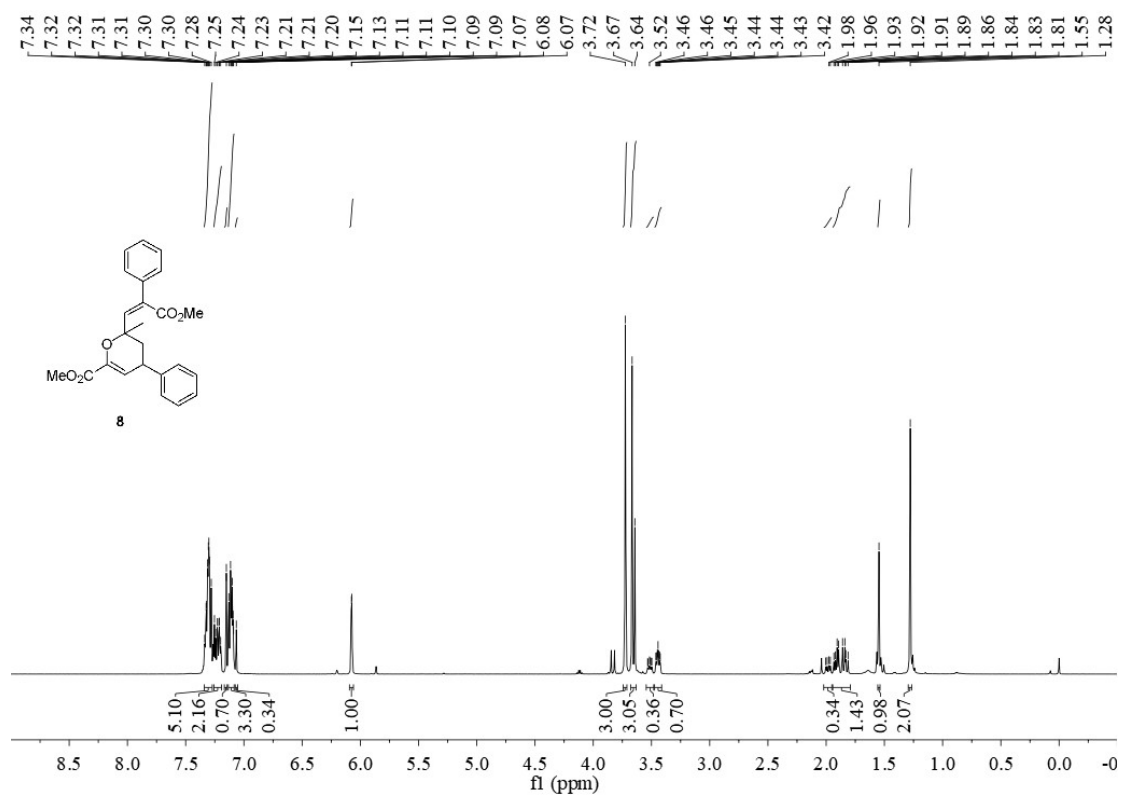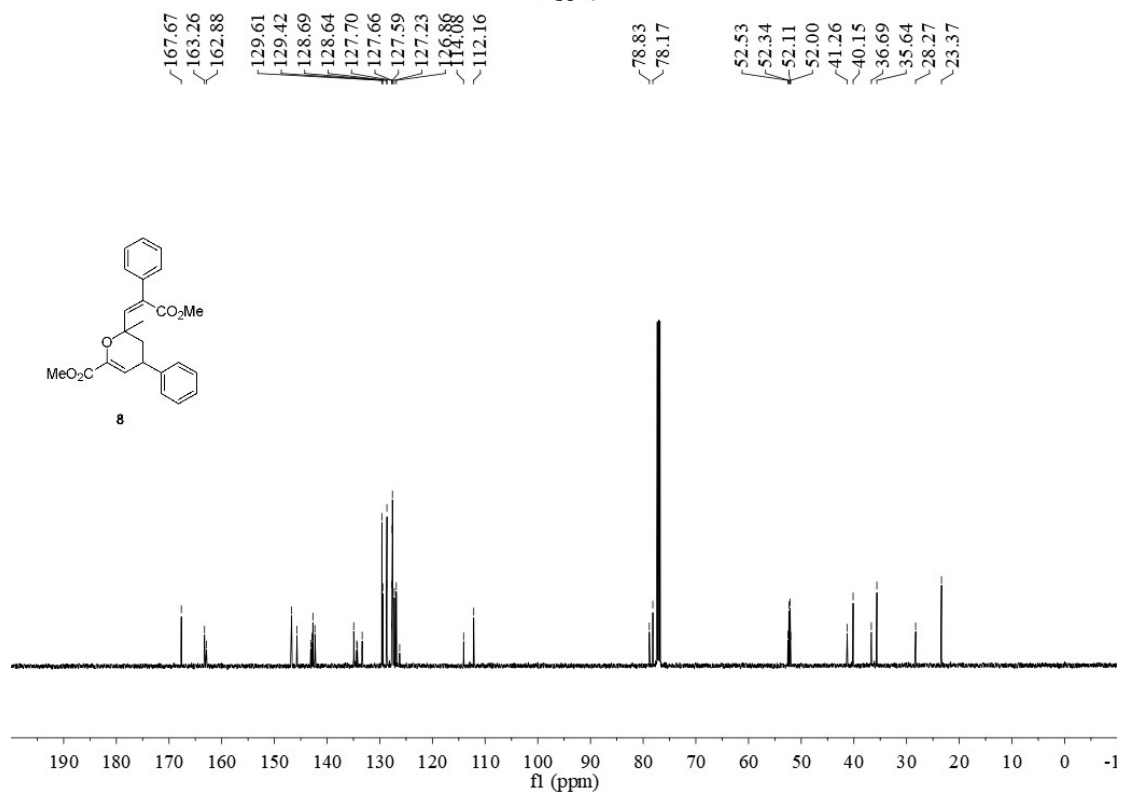

Supplement: d3qo01766d1.pdf [file d3qo01766d1.pdf]
